# Supplementary material for: Characteristics of the gut microbiome in patients with prediabetes and type 2 diabetes
Source: PeerJ journal article supplement (doi:10.7717/peerj.10952), 2021-03-24
Supplement: data.zip [file data.zip]

species	1	2	3	4	5	6	7	8	9	10	11	12	13	14	15	16	17	18	19	20	21	22	23	24	25	26	27	28	29	30	31	32	33	34	35	36	37	38	39	40	41	42	43	44	45	46	47	48	49
Unassigned	0.671487457307738	0.538947120480509	0.277305382169356	0.477258273466023	0.418937698739842	0.366694146743611	0.349899894005417	0.363773407136969	0.62963137439642	0.504180897420799	0.36356141797197	0.313955953362384	0.45759038982452	0.0604169120244965	0.574019550111883	0.275326816629372	0.410104816864916	0.580708985985161	0.525686020492286	0.324225650688965	0.337180544105524	0.492639265104228	0.355482275350371	0.57477328936521	0.225250264986456	0.538546696502179	0.493911200094217	0.306277234719114	0.409775055941585	0.332563891178895	0.523424802732305	0.335037098103875	0.394017194676717	0.389353433046755	0.639123778118007	0.487480862089271	0.468378282887764	0.533930043575551	0.432010363914733	0.48962430809092	0.526628194558945	0.63036155929808	0.157366623483689	0.283052643975975	0.569709103756919	0.580873866446826	0.452950182546225	0.418702155223177	0.377152278883524
uncultured_organism	0.096596396184195	0.071558120362737	0.259333411847839	0.160993993640325	0.175668354728536	0.368507831821929	0.149523024378754	0.155741373218702	0.0716758921210694	0.148321752443764	0.238393593216347	0.157696384407019	0.204640207278295	0.023837003886468	0.105900365092451	0.269932870097751	0.121352019785655	0.052526204216229	0.0933458956542221	0.233046755388058	0.128253444823931	0.128606760098928	0.202567424331645	0.242939583087976	0.222541514544812	0.133882934872218	0.051277823577906	0.181556942645154	0.173878224001884	0.154846307855376	0.042115180779649	0.050877399599576	0.258297020374514	0.0892709928159227	0.143234012483806	0.160169591331999	0.143752208220469	0.152325992227064	0.0921210693675657	0.134189141443882	0.148062654575433	0.0979861029325168	0.0997055706041691	0.151760687787069	0.234530679543046	0.136238370038865	0.178965963961842	0.240725474031327	0.11918501943234
Escherichia_coli_K-12	0.0147685784948769	0.0099399364032505	0.114403486044047	0.00760805558826993	0.000329760923330585	0.102602755859145	0.138311152985514	0.00105994582499117	0.0622070427511483	0.000376869626663526	0.029395830879755	0.00143681545165469	0.00845601224826287	0.460275585914498	0.00176657637498528	0.00372158756330232	0.0500529972912496	0.278695088917678	0.00162525026498646	0.00402779413496644	0.0044517724649629	0.000730184901660582	0.00268519608997762	0.0604875750794959	0.00461665292662819	0.0196443292898363	0.0924508302908962	0.00148392415498763	0.0673183370627723	0.0006359674949947	0.0826993287009775	0.00202567424331645	0.000164880461665293	0.0689435873277588	0.00252031562831233	0.0663761629961135	0.0236014603698033	0.00134259804498881	0.0491343775762572	0.0121540454598987	0.00751383818160405	0.0363443646213638	0.0798728065010011	0.00774938169826875	0.016676480979861	0.000895065363325874	0.00188434813331763	0.00188434813331763	0.000777293604993523
Eubacterium_rectale_ATCC_33656	0.0313272877164056	0.00207278294664939	0.0484277470262631	0.00904487103992463	0.113414203274055	0.000423978329996467	0.0468731598162761	0.0419267459663173	0.000141326109998822	0.0607702272994936	0.00058885879166176	0.0778471322576846	0.0123660346248969	0.000683076198327641	0.0151925568248734	0.00522906606995642	0.0233659168531386	0.000141326109998822	0.0163702744081969	0.00285007655164292	9.42174066658815e-05	0.014674361088211	0.0176186550465198	0.042562713461312	0.0276528088564362	0.00131904369332234	9.42174066658815e-05	0.0161818395948652	0.00494641384995878	0.0136144152632199	0.0302202331880815	0.0510893887645743	0.0727122835943941	0.00968083853491933	0.027040395713108	9.42174066658815e-05	0.0990931574608409	0.0351430926863738	0.000211989164998233	0.0768814038393593	0.00353315274997056	0.0707101637027441	0.0382993758096808	0.0199976445648334	0.00977505594158521	0.0424449417029796	0.00525262042162289	0.0545989871628783	0.0931810151925568
uncultured_bacterium	0.0287363090330939	0.0140619479448828	0.0058885879166176	0.00320339182663997	0.0123895889765634	0.00617124013661524	0.0185608291131787	0.0191261335531739	0.186126486868449	0.0309033093864091	0.0048521964432929	0.0371452125780238	0.0268048521964433	0.000730184901660582	0.0105759038982452	0.0114945236132375	0.0539159109645507	0.000494641384995878	0.000259097868331174	0.0382993758096808	0.00343893534330468	0.000423978329996467	0.0144152632198799	0.00348604404663762	0.043763985396302	0.0249911671181251	0.000518195736662348	0.0184195030031798	0.010764338711577	0.0772582734660228	0.0808856436226593	0.276692969026028	0.00409845718996585	0.00925686020492286	0.0105994582499117	0.0364150276763632	0.0122482628665646	0.011164762689907	0.000353315274997056	0.0193381227181722	0.0363443646213638	0.0220704275114827	0.0176186550465198	0.00527617477328937	0.0462843010246143	0.00770227299493581	0.000282652219997645	0.00362737015663644	0.011164762689907
Bacteroides_uniformis	9.42174066658815e-05	0.000871511011659404	0.0194558944765045	0.0116358497232364	0.0849605464609587	0.00598280532328348	0.0268990696031092	0.0389117889530091	7.06630549994111e-05	0.00386291367330114	0.0844187963726298	0.0341302555647156	0.0124131433282299	0.000259097868331174	0.0325050052997291	0.00685431633494288	0.00918619714992345	0.000423978329996467	0.144765045342127	0.0371216582263573	0.0322459074313979	0.0399246260746673	0.00772582734660228	4.71087033329408e-05	0.0175951006948534	0.00473442468496055	0.0294664939347544	0.213849958779885	0.0314215051230715	0.0608879990578259	0.0140855022965493	0.0233423625014721	0.0334471793663879	0.00708985985160758	0.00666588152161112	2.35543516664704e-05	0.0338240489930515	0.0473678012012719	0.0608173360028265	0.0683782828877635	0.0260746672947827	0.000895065363325874	0.00581792486161818	0.0713932399010717	4.71087033329408e-05	0.00176657637498528	0.0152867742315393	9.42174066658815e-05	0.0331409727947238
Bacteroides_stercoris	0.000188434813331763	0.00631256624661406	4.71087033329408e-05	0.00209633729831586	0.0146508067365446	0.0919326345542339	0.0777058061476858	0.127240607702273	7.06630549994111e-05	0.0006359674949947	2.35543516664704e-05	0.0108114474149099	0.0891532210575904	0.000117771758332352	0.000117771758332352	7.06630549994111e-05	0.000141326109998822	0.000188434813331763	7.06630549994111e-05	0.0140148392415499	0.0344600164880462	4.71087033329408e-05	0.0185137204098457	4.71087033329408e-05	0.0183959486515134	0.0374749735013544	2.35543516664704e-05	0.0496290189612531	9.42174066658815e-05	0.000117771758332352	0.000117771758332352	0.00329760923330585	0.0853845247909551	0.0136615239665528	0.00961017547991991	0.0133788717465552	0.0561535743728654	0.0141797197032152	4.71087033329408e-05	9.42174066658815e-05	0.0703332940760805	0.00452243551996231	0.011918501943234	0.101990342715817	0.0207278294664939	0.000706630549994111	0.0123895889765634	0.000164880461665293	0.136921446237192
uncultured_Bacteroidetes_bacterium	0.000989282769991756	0.244611942056295	4.71087033329408e-05	0.109315746084089	0.00713696855494053	4.71087033329408e-05	0.0125309150865622	0.00153103285832057	0.00226121775998116	0.0329525379813921	0.0918619714992345	0.000871511011659404	0.000141326109998822	0.000164880461665293	0.0105759038982452	0.0110940996349075	0.043316452714639	0.000376869626663526	4.71087033329408e-05	0.0148863502532093	0.00105994582499117	0.00115416323165705	0.00162525026498646	2.35543516664704e-05	0.000259097868331174	0.0114238605582381	2.35543516664704e-05	0.00341538099163821	0.1160522906607	0.147238252267106	0.0586267812978448	0.0231068189848074	0.000164880461665293	0.22963137439642	0.0393828759863385	2.35543516664704e-05	0.00211989164998233	0.00433400070663055	0.000235543516664704	0.0025438699799788	2.35543516664704e-05	0.000847956659992934	0.35161936167707	0.00737251207160523	0	0.000659521846661171	7.06630549994111e-05	0.000447532681662937	0.00499352255329172
Bacteroides_plebeius	2.35543516664704e-05	0.00148392415498763	0.000141326109998822	0	0.0153103285832057	9.42174066658815e-05	0.000117771758332352	0	0.000211989164998233	0.00770227299493581	0.000188434813331763	0.137251207160523	9.42174066658815e-05	0.000188434813331763	0.0767871864326934	0.000141326109998822	0.18318219291014	4.71087033329408e-05	2.35543516664704e-05	7.06630549994111e-05	0.248922388411259	0.00650100105994583	0	4.71087033329408e-05	0.0981509833941821	0.0252031562831233	2.35543516664704e-05	9.42174066658815e-05	4.71087033329408e-05	2.35543516664704e-05	2.35543516664704e-05	0.0283123307030974	2.35543516664704e-05	0.0229890472264751	2.35543516664704e-05	0	7.06630549994111e-05	4.71087033329408e-05	0	2.35543516664704e-05	0.0514191496879048	0.0563420091861972	0.0926628194558945	0.0987162878341774	2.35543516664704e-05	0.00383935932163467	0	0.0019079024849841	7.06630549994111e-05
Bacteroides_ovatus	0.00235543516664704	0.00061241314332823	0.00737251207160523	0.00428689200329761	0.0010363914733247	0.000329760923330585	0.00313272877164056	0.00687787068660935	7.06630549994111e-05	0.00207278294664939	0.028241667648098	0.00471087033329408	0.00256742433164527	0.0527617477328937	0.0120127193498999	0.0173595571781887	0.00539394653162172	0.000353315274997056	0	0.00452243551996231	0.0256742433164527	0.0168884701448593	0.0346484513013779	0.00228477211164763	0.00341538099163821	0.0100812625132493	0.125568248733954	0.0191025792015075	0.0338476033447179	0.0595218466611706	0.00136615239665528	0.00388646802496761	0.0264986456247792	0.00814980567659875	0.0104581321399128	0.000494641384995878	0.00428689200329761	0.00664232716994465	0.0920975150158992	0.00824402308326463	0.0136850783182193	0.000282652219997645	0.000400423978329996	0.00869155576492757	0.00148392415498763	0.0019079024849841	0.017477328936521	2.35543516664704e-05	0.0489694971145919
Bacteroides_thetaiotaomicron	0.000164880461665293	0.000824402308326463	0.090236721234248	0.00532328347662231	0.00136615239665528	0.00058885879166176	0.0134966435048875	0.00909197974325757	2.35543516664704e-05	0.00461665292662819	0.00668943587327759	0.00115416323165705	0.00346248969497115	0.31678247556236	0.006359674949947	0.0141326109998822	0.0012719349899894	7.06630549994111e-05	0.000164880461665293	0.0139677305382169	0.00487575079495937	0.0101048168649158	0.0132610999882228	0.0191967966081734	0.0057237074549523	0.00256742433164527	0.0686844894594276	0.0118007301849017	0.00586503356495112	0.00680720763160994	0.00216700035331528	0.0166293722765281	0.00701919679660817	0.00176657637498528	0.00207278294664939	4.71087033329408e-05	0.0118949475915675	0.0158520786715346	0.119962313037334	0.00727829466493935	0.00671299022494406	0.00122482628665646	0.000753739253327052	0.00110705452832411	0.0021434460016488	0.00143681545165469	0.00282652219997645	0.000117771758332352	0.00579437050995171
Bifidobacterium_pseudocatenulatum_DSM_20438_=_JCM_1200_=_LMG_10505	0.0216935578848192	0.000188434813331763	0.00113060887999058	7.06630549994111e-05	0.00426333765163114	0.00989282769991756	9.42174066658815e-05	0.0330938640913909	0.0118478388882346	0.000188434813331763	4.71087033329408e-05	0.00932752325992227	0.00169591331998587	7.06630549994111e-05	2.35543516664704e-05	0.00991638205158403	0.00402779413496644	7.06630549994111e-05	0.0724531857260629	0.00979861029325168	0	0.0181368507831822	2.35543516664704e-05	0.000518195736662348	0.00134259804498881	0.00183723942998469	2.35543516664704e-05	0.00577081615828524	0.00885643622659286	0.0058885879166176	4.71087033329408e-05	0.000447532681662937	0.0100105994582499	0.000683076198327641	0.000659521846661171	0.122223530797315	0.00181368507831822	0.0104110234365799	4.71087033329408e-05	0.0101519255682487	0	0.00113060887999058	0	0.0126722411965611	0.017877752914851	0.000494641384995878	4.71087033329408e-05	0.097844776822518	4.71087033329408e-05
Bacteroides_coprocola	2.35543516664704e-05	0.00409845718996585	2.35543516664704e-05	0.0528559651395595	0	2.35543516664704e-05	0	2.35543516664704e-05	0	0.00520551171828995	4.71087033329408e-05	2.35543516664704e-05	7.06630549994111e-05	0	0	0	9.42174066658815e-05	4.71087033329408e-05	4.71087033329408e-05	4.71087033329408e-05	4.71087033329408e-05	2.35543516664704e-05	4.71087033329408e-05	0	9.42174066658815e-05	0	4.71087033329408e-05	2.35543516664704e-05	4.71087033329408e-05	4.71087033329408e-05	4.71087033329408e-05	0	2.35543516664704e-05	7.06630549994111e-05	7.06630549994111e-05	2.35543516664704e-05	2.35543516664704e-05	2.35543516664704e-05	0	0	0	2.35543516664704e-05	0.0599929336945001	2.35543516664704e-05	4.71087033329408e-05	2.35543516664704e-05	2.35543516664704e-05	0.00532328347662231	2.35543516664704e-05
Bacteroides_fragilis_638R	0	0.00129548934165587	2.35543516664704e-05	2.35543516664704e-05	2.35543516664704e-05	0.0194323401248381	0.000895065363325874	0.000494641384995878	0	2.35543516664704e-05	0.00395713107996702	0	2.35543516664704e-05	0.016323165704864	0.0151690024732069	0	0.00226121775998116	9.42174066658815e-05	0	0.00447532681662937	4.71087033329408e-05	2.35543516664704e-05	0.00391002237663408	0	2.35543516664704e-05	0.00303851136497468	0.0410787893063243	0.0150512307148746	0.000376869626663526	0.00504063125662466	0.000400423978329996	0.0171946767165234	0.0152161111765399	4.71087033329408e-05	0	2.35543516664704e-05	0.0015074785066541	0	0.0427275939229773	0.0246142974914615	0	0.000211989164998233	0.00153103285832057	0.00164880461665293	0.0010363914733247	0.000259097868331174	0.000211989164998233	7.06630549994111e-05	2.35543516664704e-05
Bacteroides_massiliensis	0.000188434813331763	0.000259097868331174	0	0.00428689200329761	2.35543516664704e-05	0	0.1039689082558	0.107125191379107	0.000376869626663526	2.35543516664704e-05	2.35543516664704e-05	0.021034036038158	0.147991991520433	9.42174066658815e-05	2.35543516664704e-05	0.0276057001531033	7.06630549994111e-05	0	0	0.00464020727829466	2.35543516664704e-05	2.35543516664704e-05	9.42174066658815e-05	0	4.71087033329408e-05	0.0211989164998233	0	0	7.06630549994111e-05	2.35543516664704e-05	7.06630549994111e-05	0	2.35543516664704e-05	2.35543516664704e-05	0.0505005299729125	0	9.42174066658815e-05	0.00878577317159345	0	7.06630549994111e-05	0	2.35543516664704e-05	0.00122482628665646	0	4.71087033329408e-05	2.35543516664704e-05	0.0831704157343069	2.35543516664704e-05	0.0274172653397715
uncultured_Firmicutes_bacterium	0	0.000141326109998822	2.35543516664704e-05	2.35543516664704e-05	0.000353315274997056	2.35543516664704e-05	4.71087033329408e-05	0	0.00923330585325639	0.0427275939229773	0.000141326109998822	0.000400423978329996	0	7.06630549994111e-05	0	4.71087033329408e-05	0.00061241314332823	0	0.00188434813331763	0.0192439053115063	0.000730184901660582	4.71087033329408e-05	4.71087033329408e-05	2.35543516664704e-05	0.0161111765398657	9.42174066658815e-05	0	4.71087033329408e-05	4.71087033329408e-05	7.06630549994111e-05	0.0390295607113414	0.0322459074313979	4.71087033329408e-05	0.000188434813331763	0.00551171828995407	0	4.71087033329408e-05	0.0133553173948887	2.35543516664704e-05	2.35543516664704e-05	0.000800847956659993	0.000117771758332352	0.000659521846661171	0.000659521846661171	0	0	4.71087033329408e-05	0	9.42174066658815e-05
Bacteroides_caccae	0	0	0.000306206571664115	0.000471087033329408	0.000753739253327052	4.71087033329408e-05	0.00732540336827229	0.0057237074549523	4.71087033329408e-05	0.000447532681662937	0.0311624072547403	0.000800847956659993	0.00280296784830998	0.00169591331998587	0.0206100577081616	0.000211989164998233	4.71087033329408e-05	0.000117771758332352	0	0.013520197856554	0.011117653986574	2.35543516664704e-05	2.35543516664704e-05	0	0.011117653986574	0.00435755505829702	0.0629372276528089	0.000259097868331174	0.0307855376280768	0.0904016016959133	4.71087033329408e-05	0.00558238134495348	2.35543516664704e-05	0.00400423978329996	0.00292073960664233	0	0.0142503827582146	0.00487575079495937	0	0.00610057708161583	4.71087033329408e-05	0.00113060887999058	0	0.00544105523495466	0.00393357672830055	0.00193145683665057	0.0183723942998469	4.71087033329408e-05	0.0125780237898952
uncultured_Eubacteriaceae_bacterium	0.00798492521493346	0.00449888116829584	0.000753739253327052	0.00369803321163585	0.0123424802732305	2.35543516664704e-05	0.00200211989164998	0.0111883170415734	0.000141326109998822	0.00296784830997527	0.00706630549994111	0.0137557413732187	0.00885643622659286	9.42174066658815e-05	0.00873866446826051	0.0106465669532446	0.00923330585325639	0	0.018678600871511	0.00638322930161347	0.00657166411494524	0.00431044635496408	0.00701919679660817	0.00270875044164409	0.00539394653162172	0.0016723589683194	0.000730184901660582	0.010764338711577	0.0118242845365681	0.00374514191496879	0.00204922859498292	0.00160169591331999	0.00261453303497821	0.00367447885996938	0.00466376162996114	0	0.00979861029325168	0.00263808738664468	0.0073960664232717	0.00942174066658815	0.0161818395948652	0.00760805558826993	0.010316806029914	0.00405134848663291	0.0172888941231893	0.00287363090330939	0.00598280532328348	0.00487575079495937	0.00793781651160052
Parabacteroides_merdae	0.0799434695560005	0.00376869626663526	0	0.00534683782828878	0.00157814156165352	0.00171946767165234	0.0137321870215522	0.0130491108232246	4.71087033329408e-05	0.00275585914497703	0.00961017547991991	0.00391002237663408	2.35543516664704e-05	9.42174066658815e-05	0.0114474149099046	2.35543516664704e-05	0.00487575079495937	2.35543516664704e-05	0.0161111765398657	0.0118949475915675	0.00956306677658697	0.0368390060063597	0.0652219997644565	0	0.00426333765163114	0.00664232716994465	0	0	0.0148392415498763	4.71087033329408e-05	0.00226121775998116	0.028594982923095	0.0100105994582499	0.00975150158991874	0.00386291367330114	0.00395713107996702	2.35543516664704e-05	0.0196678836415028	0.00365092450830291	0.0105759038982452	0.00518195736662348	0.00129548934165587	0.00537039217995525	0.0260275585914498	2.35543516664704e-05	0.00247320692497939	0.00471087033329408	0.000164880461665293	0.0124602520315628
Parabacteroides_distasonis_ATCC_8503	0	0.0006359674949947	0	0.00600635967494995	0.00105994582499117	0.00058885879166176	0.00336827228830526	0.0006359674949947	2.35543516664704e-05	0.00419267459663173	0.00770227299493581	0.00193145683665057	0.00157814156165352	0.000164880461665293	0.00838534919326346	0.0460016488046167	0.00134259804498881	7.06630549994111e-05	0	0.00789070780826758	0.00986927334825109	0.000376869626663526	0.0230126015781416	4.71087033329408e-05	0.00819691437993169	0.010363914733247	0.0212695795548228	0	0.0198092097515016	0.0181132964315157	0.00204922859498292	0.00336827228830526	0	0.00299140266164174	0.00398068543163349	4.71087033329408e-05	0.0006359674949947	0.00487575079495937	0.0301495701330821	0	0.0257684607231186	0.000329760923330585	0.00226121775998116	0.0230126015781416	0.00515840301495701	0.00108350017665764	0.0123660346248969	4.71087033329408e-05	0.00534683782828878
Lachnospira_pectinoschiza	0.000235543516664704	0.00058885879166176	2.35543516664704e-05	0.000376869626663526	0.000518195736662348	0	0.000753739253327052	0.000494641384995878	0.000494641384995878	0.0021434460016488	0.00628901189494759	0.000235543516664704	0.00110705452832411	0.00160169591331999	0.00456954422329525	0.00433400070663055	0.00176657637498528	0	0.00499352255329172	0.00256742433164527	4.71087033329408e-05	0.00339182663997173	0.0186314921681781	0.0372158756330232	0.00591214226828407	2.35543516664704e-05	9.42174066658815e-05	0.00115416323165705	0.000211989164998233	0.00207278294664939	0.00343893534330468	0.00146036980332116	0.0191496879048404	0.000141326109998822	0.00579437050995171	0.000164880461665293	0.0158285243198681	0.00108350017665764	2.35543516664704e-05	0.000141326109998822	4.71087033329408e-05	0.0177599811565187	0.00174302202331881	0.0101519255682487	0.00624190319161465	0.00131904369332234	0.0147450241432105	0.0458838770462843	7.06630549994111e-05
Streptococcus_salivarius	0.000447532681662937	0.00360381580496997	0.00836179484159699	2.35543516664704e-05	0.00325050052997291	7.06630549994111e-05	0.000942174066658815	4.71087033329408e-05	0.00120127193498999	0	2.35543516664704e-05	0.000494641384995878	0.000730184901660582	0.00407490283829938	0.00174302202331881	0.0109763278765752	0.000376869626663526	0.00188434813331763	0.00110705452832411	0.00400423978329996	0.00105994582499117	0.00228477211164763	0.000471087033329408	0.000282652219997645	0.00320339182663997	0.000282652219997645	2.35543516664704e-05	0.00141326109998822	0.00155458720998705	0.000164880461665293	2.35543516664704e-05	0.00204922859498292	0.0477446708279355	0.000141326109998822	9.42174066658815e-05	0.00211989164998233	0.000753739253327052	0.00690142503827582	0.000306206571664115	0.00605346837828289	0.018725709574844	0.0065245554116123	2.35543516664704e-05	0.0105052408432458	0.00513484866329054	0.0895771993875869	0.00176657637498528	0.0129313390648922	0.00141326109998822
Bifidobacterium_adolescentis	0	0.00567659875161936	0	0.000117771758332352	0.00261453303497821	0.00162525026498646	0.00101283712165823	0.027841243669768	0	0.0076316099399364	9.42174066658815e-05	0.0833352961959722	2.35543516664704e-05	0.000117771758332352	0	0.00532328347662231	0.0267577434931104	2.35543516664704e-05	2.35543516664704e-05	0.000518195736662348	0	4.71087033329408e-05	0	0.000659521846661171	2.35543516664704e-05	0.0376162996113532	0	0	2.35543516664704e-05	7.06630549994111e-05	0.00160169591331999	7.06630549994111e-05	0	0.00405134848663291	0.00233188081498057	0	4.71087033329408e-05	0	0	0.000565304439995289	2.35543516664704e-05	0.00610057708161583	0.017124013661524	0	4.71087033329408e-05	0.00261453303497821	0	0.083523731009304	0
Eubacterium_eligens_ATCC_27750	0	0	0.0357790601813685	0.00405134848663291	0.00221410905664822	0	0	4.71087033329408e-05	0.00400423978329996	9.42174066658815e-05	0.00181368507831822	0.00105994582499117	0	0.000164880461665293	0.00296784830997527	0	0.00273230479331056	0	0	0.00179013072665175	0.0846072311859616	4.71087033329408e-05	0.00310917441997409	0.0006359674949947	0.000400423978329996	0	2.35543516664704e-05	0.0029442939583088	0.00325050052997291	2.35543516664704e-05	4.71087033329408e-05	0.000141326109998822	2.35543516664704e-05	0.00598280532328348	0.000259097868331174	0.0133082086915558	0.000259097868331174	0.00935107761158874	0	0.00965728418325286	0	0.00626545754328112	0.000565304439995289	0.00110705452832411	0	0.000211989164998233	2.35543516664704e-05	0	0.00619479448828171
Bacteroides_cellulosilyticus	0.0118713932399011	2.35543516664704e-05	2.35543516664704e-05	0.00204922859498292	0.012719349899894	0	0.000188434813331763	0.000282652219997645	2.35543516664704e-05	0.0145094806265458	0.0143681545165469	9.42174066658815e-05	4.71087033329408e-05	4.71087033329408e-05	0	0.175833235190201	0.000353315274997056	0	2.35543516664704e-05	0.010316806029914	0	0	0.0142032740548816	0	0.000188434813331763	0.000259097868331174	0	0	2.35543516664704e-05	0	0.0016723589683194	0.0144388175715463	0	0.00365092450830291	0.00174302202331881	0	0.00393357672830055	0.00388646802496761	4.71087033329408e-05	0.000730184901660582	2.35543516664704e-05	0	2.35543516664704e-05	0.00138970674832175	0	0.000141326109998822	0	2.35543516664704e-05	0.000565304439995289
Bacteroides_coprophilus	2.35543516664704e-05	4.71087033329408e-05	0	0.0113767518549052	0.0100341538099164	0	0	0	0	0.000141326109998822	0	4.71087033329408e-05	0.000117771758332352	0	2.35543516664704e-05	2.35543516664704e-05	0	0	2.35543516664704e-05	2.35543516664704e-05	0	0.140313272877164	4.71087033329408e-05	0	0.0303380049464138	0	0	0	0	0	0	0	0	0	0	7.06630549994111e-05	2.35543516664704e-05	0.0263808738664468	4.71087033329408e-05	0	0	0	2.35543516664704e-05	2.35543516664704e-05	2.35543516664704e-05	0.00546460958662113	0	0.0164644918148628	0
Ruminococcus_bicirculans	0.00146036980332116	0	0	0.000188434813331763	0.000871511011659404	0	0.000447532681662937	0	0	0.00124838063832293	9.42174066658815e-05	0.00221410905664822	2.35543516664704e-05	0	4.71087033329408e-05	0.00256742433164527	0.00120127193498999	0	2.35543516664704e-05	0	0.00461665292662819	2.35543516664704e-05	0.0187492639265104	0.00315628312330703	2.35543516664704e-05	0	0	0.0461429749146155	4.71087033329408e-05	2.35543516664704e-05	0.000117771758332352	0.000706630549994111	4.71087033329408e-05	0.0224001884348133	2.35543516664704e-05	0.0391002237663408	0	0.000895065363325874	0	0.00110705452832411	0	4.71087033329408e-05	0.000353315274997056	0.0596631727711695	0	0	4.71087033329408e-05	0	0.00972794723825227
Collinsella_aerofaciens	0	0.00226121775998116	0.000141326109998822	0.0015074785066541	0.0145801436815452	7.06630549994111e-05	0.000989282769991756	2.35543516664704e-05	2.35543516664704e-05	0.00061241314332823	0.0012719349899894	0	4.71087033329408e-05	0	9.42174066658815e-05	0.0131904369332234	0.00579437050995171	2.35543516664704e-05	0	0.00532328347662231	0	0	4.71087033329408e-05	0	0.00155458720998705	0.0168413614415263	0	0.00706630549994111	2.35543516664704e-05	0.00532328347662231	0.000494641384995878	0.000777293604993523	0	0.0035802614533035	0.00325050052997291	0	0.00280296784830998	0.00058885879166176	2.35543516664704e-05	0	9.42174066658815e-05	0.00131904369332234	0.00614768578494877	0	0.00282652219997645	0.00468731598162761	0	0.00195501118831704	0
Prevotella_stercorea	4.71087033329408e-05	0.0468024967612766	0	0	0	0	0	0	0.0139912848898834	0	4.71087033329408e-05	0	4.71087033329408e-05	2.35543516664704e-05	0	0	0	0	2.35543516664704e-05	2.35543516664704e-05	0	2.35543516664704e-05	0	2.35543516664704e-05	0.189376987398422	2.35543516664704e-05	0	0	0	0	0.00527617477328937	0.00558238134495348	0	0.000117771758332352	0	0	4.71087033329408e-05	2.35543516664704e-05	0	0	0	2.35543516664704e-05	0	2.35543516664704e-05	0	2.35543516664704e-05	2.35543516664704e-05	2.35543516664704e-05	0
Blautia_obeum	0.00595925097161701	0.0012719349899894	4.71087033329408e-05	0.000989282769991756	0.00134259804498881	0	0.00162525026498646	0.00200211989164998	0	0.00275585914497703	0.00207278294664939	0.00287363090330939	0.00393357672830055	0.000117771758332352	0.0057237074549523	0.0152867742315393	0.00383935932163467	0	4.71087033329408e-05	0.00336827228830526	0.00115416323165705	0.0015074785066541	0.0006359674949947	9.42174066658815e-05	0.00124838063832293	0.00383935932163467	0	0.00574726180661877	0	0.00115416323165705	0.00473442468496055	0.000918619714992345	0.00117771758332352	0.00343893534330468	0.00471087033329408	0.00647744670827935	0.00511129431162407	0.00339182663997173	0	0.0112589800965728	0.00108350017665764	0.00171946767165234	0.00268519608997762	0.00296784830997527	0.00101283712165823	0.00240254386997998	0.000259097868331174	0.00193145683665057	0.00777293604993523
Sutterella_wadsworthensis	2.35543516664704e-05	2.35543516664704e-05	0	0	0	0.000141326109998822	0	0	0	0	0	0	2.35543516664704e-05	0	0	0	4.71087033329408e-05	0.06599929336945	2.35543516664704e-05	2.35543516664704e-05	0	4.71087033329408e-05	0	0	0	0.00822046873159816	2.35543516664704e-05	2.35543516664704e-05	0.0191261335531739	2.35543516664704e-05	2.35543516664704e-05	0.00143681545165469	7.06630549994111e-05	7.06630549994111e-05	2.35543516664704e-05	0	0	0	0	0	0	2.35543516664704e-05	0	2.35543516664704e-05	4.71087033329408e-05	0.00741962077493817	0	0	0
Bacteroides_eggerthii	0	7.06630549994111e-05	0	0	0	0	0.00487575079495937	0.00058885879166176	2.35543516664704e-05	0.0157343069132022	0	0.0111412083382405	0	4.71087033329408e-05	0	0	0.00138970674832175	0	2.35543516664704e-05	0.0245907431397951	0.0177835355081851	0	0	0	0.0116594040749028	0.000235543516664704	0	2.35543516664704e-05	2.35543516664704e-05	0	0.0021434460016488	0	0	2.35543516664704e-05	0	0	2.35543516664704e-05	0	0	0.0233423625014721	0	0	0	0	0	0	2.35543516664704e-05	0	0.0194323401248381
uncultured_Ruminococcaceae_bacterium	0	0.00120127193498999	0	0.00600635967494995	0.00711341420327405	0	0.0015074785066541	0.0010363914733247	2.35543516664704e-05	0.00499352255329172	0.0048521964432929	0.00226121775998116	0.000471087033329408	0	0.00365092450830291	0.0151454481215405	0.00193145683665057	0	0	0.00920975150158992	0.000259097868331174	0.0136615239665528	0.0133082086915558	0.000918619714992345	0.000471087033329408	0.000306206571664115	0	7.06630549994111e-05	2.35543516664704e-05	2.35543516664704e-05	0.0153809916382052	0.0152396655282063	0	0.0080320339182664	0.0025438699799788	2.35543516664704e-05	0.00805558826993287	0.00685431633494288	0	0.00306206571664115	2.35543516664704e-05	0.0042162289482982	0.0021434460016488	0.00885643622659286	0	0.00202567424331645	0.00270875044164409	4.71087033329408e-05	0.00765516429160287
Fusobacterium_mortiferum	0	0	2.35543516664704e-05	0	0	0	0	0	0	0	0	2.35543516664704e-05	0	0	0.00449888116829584	0	0	0	0	0	0	0	0	0	0.000117771758332352	0	0	0	0	2.35543516664704e-05	0.000117771758332352	0	0	2.35543516664704e-05	0	0	2.35543516664704e-05	0	0	0	0	0	0	0	0	2.35543516664704e-05	0.145118360617124	0	0
Ruminococcus_callidus	2.35543516664704e-05	0.000117771758332352	2.35543516664704e-05	0.00911553409492404	0.00101283712165823	0	4.71087033329408e-05	0.00850312095159581	0	0	0.00129548934165587	0.000423978329996467	2.35543516664704e-05	0	0.00610057708161583	0.00164880461665293	0.00492285949829231	0	0	9.42174066658815e-05	0	0	0	0	0.000164880461665293	0	0	0.00805558826993287	0.00643033800494641	0	0.00136615239665528	0	0	0.0275114827464374	0.000306206571664115	0	0.00758450123660346	0.0270875044164409	0	0.00789070780826758	0	0.00741962077493817	0.000942174066658815	0.0224001884348133	2.35543516664704e-05	0.00115416323165705	0.000141326109998822	7.06630549994111e-05	0.00306206571664115
butyrate-producing_bacterium_A2-166	0	0	4.71087033329408e-05	0.0205393946531622	2.35543516664704e-05	0	0.000282652219997645	2.35543516664704e-05	0	0.00876221881992698	0.000235543516664704	0.025485808503121	2.35543516664704e-05	0	0.0259097868331174	0	0.000353315274997056	0	0	0.00607702272994936	0	2.35543516664704e-05	0.0333058532563891	0	0.000565304439995289	0.000164880461665293	0	0	0	0	0	0.00942174066658815	0	0.0247791779531268	2.35543516664704e-05	0	0.00464020727829466	0.000400423978329996	0	0	0	0.00061241314332823	0.00270875044164409	0	0	0.00136615239665528	2.35543516664704e-05	2.35543516664704e-05	0
Lactobacillus_salivarius_UCC118	0	0.00287363090330939	0.00207278294664939	2.35543516664704e-05	0.0152867742315393	0	0.000518195736662348	0	0	0.000211989164998233	0	2.35543516664704e-05	0	0	0	0	2.35543516664704e-05	2.35543516664704e-05	0	0.00181368507831822	0	0.0533034978212225	0	9.42174066658815e-05	0.000777293604993523	0	0	0	0	4.71087033329408e-05	0.00219055470498175	0	0	0	4.71087033329408e-05	0.00428689200329761	2.35543516664704e-05	0.000211989164998233	0	0	0	0	0	0	0	0	0	0	0.000141326109998822
uncultured_Clostridiaceae_bacterium	7.06630549994111e-05	0.00131904369332234	0.00108350017665764	0.000400423978329996	0.000376869626663526	0.0006359674949947	0.0021434460016488	0.00911553409492404	0	0.00101283712165823	0.00216700035331528	0.0131433282298905	0.000211989164998233	7.06630549994111e-05	0.00058885879166176	0.00506418560829113	0.00789070780826758	0	0.00372158756330232	0.00143681545165469	0.000565304439995289	0.000117771758332352	0.0015074785066541	0.000730184901660582	0.0248969497114592	0.000423978329996467	0.00129548934165587	0.00805558826993287	0.0109763278765752	9.42174066658815e-05	0.000447532681662937	7.06630549994111e-05	0.00157814156165352	0.0012719349899894	0.00280296784830998	0.00466376162996114	0.00989282769991756	0	0.00249676127664586	0.00155458720998705	0.00117771758332352	0.00496996820162525	0.00296784830997527	0.000164880461665293	0.00678365327994347	0.000965728418325286	2.35543516664704e-05	7.06630549994111e-05	0.000423978329996467
uncultured_Veillonellaceae_bacterium	2.35543516664704e-05	0	0	0	0	0	0	0	0	0.0582028029678483	0	0	2.35543516664704e-05	0	2.35543516664704e-05	0	0	0	2.35543516664704e-05	7.06630549994111e-05	4.71087033329408e-05	0	2.35543516664704e-05	0	2.35543516664704e-05	0.0313272877164056	2.35543516664704e-05	2.35543516664704e-05	2.35543516664704e-05	4.71087033329408e-05	0.0023083264633141	0.0161818395948652	2.35543516664704e-05	2.35543516664704e-05	0	0	0	0	0	0	2.35543516664704e-05	0	2.35543516664704e-05	2.35543516664704e-05	0	0.0313037333647391	0	0	0
Lactobacillus_ruminis	2.35543516664704e-05	0.00558238134495348	0	0	0	2.35543516664704e-05	0	0	0	2.35543516664704e-05	0	0	2.35543516664704e-05	2.35543516664704e-05	0	0	2.35543516664704e-05	2.35543516664704e-05	2.35543516664704e-05	0.00737251207160523	0	0	0	0	0	0.0126722411965611	0	0	2.35543516664704e-05	0	0.000400423978329996	0	0	4.71087033329408e-05	0	0	0	0	0	0	0	0	0.0140619479448828	0	0	0	0	0	0
butyrate-producing_bacterium_L2-12	0.00101283712165823	0.000259097868331174	0	0.00661877281827818	0.00164880461665293	0	0.000423978329996467	0.00478153338829349	0	0.0126251324932281	0.00741962077493817	0.0029442939583088	0.000918619714992345	0	0.00325050052997291	0.00694853374160876	0.00296784830997527	0	0	0.0100577081615829	0.00322694617830644	0.00259097868331174	0.00200211989164998	0.000895065363325874	0.000800847956659993	7.06630549994111e-05	0	0.0418325285596514	0.00188434813331763	0.00836179484159699	0.000306206571664115	0.00558238134495348	0.00195501118831704	0.00228477211164763	0.00120127193498999	0.00289718525497586	0.00256742433164527	0.00431044635496408	0	0.0021434460016488	2.35543516664704e-05	0.00157814156165352	0.000918619714992345	0.00350959839830409	0.00108350017665764	0.00289718525497586	0.000753739253327052	4.71087033329408e-05	0.00772582734660228
Odoribacter_splanchnicus_DSM_220712	2.35543516664704e-05	0.000117771758332352	0	0.00391002237663408	0.00138970674832175	0	0.0010363914733247	0.0015074785066541	0	0.0016723589683194	0.00855022965492875	0.0012719349899894	2.35543516664704e-05	2.35543516664704e-05	0	0	0.000706630549994111	0	0	0.0099399364032505	2.35543516664704e-05	0	0.00464020727829466	0	0.00233188081498057	0.00518195736662348	0	2.35543516664704e-05	0	2.35543516664704e-05	0.0012719349899894	0.00233188081498057	2.35543516664704e-05	0.0050877399599576	0	0	2.35543516664704e-05	0.00402779413496644	2.35543516664704e-05	0.00419267459663173	0	0	0.00122482628665646	0.00482864209162643	0	0.000423978329996467	0.00160169591331999	4.71087033329408e-05	0.00796137086326699
Alistipes_shahii	0	0	0	0.000117771758332352	0.00579437050995171	0	0.00124838063832293	0.000518195736662348	0	0.00105994582499117	0.00435755505829702	0.00487575079495937	0.000494641384995878	2.35543516664704e-05	0.00261453303497821	0.00179013072665175	0.000518195736662348	0	2.35543516664704e-05	0.0237427864798021	0.00343893534330468	2.35543516664704e-05	0.00376869626663526	2.35543516664704e-05	0.000565304439995289	0.00751383818160405	0	2.35543516664704e-05	2.35543516664704e-05	0	0.00117771758332352	0.000659521846661171	0	0.0023083264633141	0.00117771758332352	0	0.00160169591331999	0.0031798374749735	0.00122482628665646	0.00280296784830998	0	0	0.0010363914733247	0.00605346837828289	0	0.000471087033329408	4.71087033329408e-05	0	0.0105759038982452
Clostridiaceae_bacterium_DJF_VR76	0	7.06630549994111e-05	0	4.71087033329408e-05	2.35543516664704e-05	2.35543516664704e-05	2.35543516664704e-05	0	0	2.35543516664704e-05	0	0	0	2.35543516664704e-05	0	0	2.35543516664704e-05	0	0.0883759274525969	0.0165116005181957	2.35543516664704e-05	4.71087033329408e-05	0	0	0	0	0	2.35543516664704e-05	0	0	0	2.35543516664704e-05	0	0	0	0	0.0202096337298316	0	0	0	0.015522317748204	0	7.06630549994111e-05	0.000447532681662937	0	0	2.35543516664704e-05	2.35543516664704e-05	0
uncultured_bacterium_adhufec108	2.35543516664704e-05	0	0	0.000447532681662937	0.000259097868331174	0	4.71087033329408e-05	0	0	0.00174302202331881	2.35543516664704e-05	0	2.35543516664704e-05	2.35543516664704e-05	0	0	0.000141326109998822	0	0	0.00807914262159934	0	0	2.35543516664704e-05	0	4.71087033329408e-05	0	4.71087033329408e-05	0	7.06630549994111e-05	0	0.00353315274997056	0	2.35543516664704e-05	0.000753739253327052	0	0	0.00183723942998469	0.000847956659992934	0	0.0118007301849017	0	0	0.000871511011659404	0.014721469791544	0	0.000211989164998233	2.35543516664704e-05	0.000141326109998822	0.000423978329996467
uncultured_Christensenellaceae_bacterium	2.35543516664704e-05	0	0	0.000211989164998233	0	0	0	0	0	2.35543516664704e-05	0.00207278294664939	0.00711341420327405	0	0	0	0	0.00287363090330939	2.35543516664704e-05	0	0.0226592863031445	2.35543516664704e-05	2.35543516664704e-05	0.00584147921328465	0	0	0	2.35543516664704e-05	0	0	0	2.35543516664704e-05	0.000565304439995289	0	0.00329760923330585	0	0	0.0080320339182664	0.00237898951831351	0	0.00791426215993405	0	0	0	0	0	2.35543516664704e-05	0	0	0.00454598987162878
Bacteroides_salyersiae	2.35543516664704e-05	9.42174066658815e-05	9.42174066658815e-05	0	0.000164880461665293	2.35543516664704e-05	0.00683076198327641	0.000376869626663526	0	7.06630549994111e-05	0.00195501118831704	0.000141326109998822	0.000423978329996467	0.0394299846896714	0.0148392415498763	2.35543516664704e-05	0.000306206571664115	0	0	2.35543516664704e-05	0.00643033800494641	0	0	0	0	0	0	2.35543516664704e-05	0	0	4.71087033329408e-05	4.71087033329408e-05	0	0	0	0	2.35543516664704e-05	0	0	0	0	0	0.000117771758332352	0.00105994582499117	0	0.000188434813331763	0.00285007655164292	0	0.00584147921328465
Lactobacillus_mucosae_LM1	0	0	0.00327405488163938	0	0.000329760923330585	0	2.35543516664704e-05	0.000282652219997645	2.35543516664704e-05	0.000871511011659404	0	4.71087033329408e-05	0	0	0	0	0	0	0	9.42174066658815e-05	0	2.35543516664704e-05	0	0	2.35543516664704e-05	2.35543516664704e-05	0	0	0	0	0	0	2.35543516664704e-05	0	0	0	0	0	0	0	0.0200447532681663	0	0	0.000706630549994111	0	0.0350959839830409	2.35543516664704e-05	0	2.35543516664704e-05
butyrate-producing_bacterium_L2-50	0	0	0	0.000306206571664115	0.0209162642798257	0	2.35543516664704e-05	0	0	0.000777293604993523	0	0	0	0	0	0	0.00162525026498646	0	0	0	0	0.000800847956659993	0	0	0	0	0	0	0	0	0.000117771758332352	0.000800847956659993	0	4.71087033329408e-05	0.0042162289482982	2.35543516664704e-05	0.00398068543163349	0.00268519608997762	0	4.71087033329408e-05	0	0.000211989164998233	0.000188434813331763	0.00393357672830055	2.35543516664704e-05	0	0	0	9.42174066658815e-05
Coprococcus_catus	0	0.000541750088328819	2.35543516664704e-05	0.000706630549994111	0.00471087033329408	0.000306206571664115	0.00200211989164998	0.000753739253327052	0.00275585914497703	0.000518195736662348	0	0.00169591331998587	0.0010363914733247	0	0.00117771758332352	2.35543516664704e-05	0.00136615239665528	0	2.35543516664704e-05	0.00200211989164998	0.000965728418325286	0.00115416323165705	0.00120127193498999	0	0.0012719349899894	0.000188434813331763	0	0.0031798374749735	0	0	0.00058885879166176	0.00134259804498881	0.00136615239665528	0.000306206571664115	0.00146036980332116	0	0.00176657637498528	0.00171946767165234	0	0.00171946767165234	9.42174066658815e-05	0.00153103285832057	0.00169591331998587	0.000824402308326463	0.00108350017665764	0.000353315274997056	0.000188434813331763	0.00395713107996702	0.00136615239665528
uncultured_Eubacterium_sp.	0	0	0.000188434813331763	7.06630549994111e-05	0	0	0	0	2.35543516664704e-05	9.42174066658815e-05	0	0.0023083264633141	0	0.000141326109998822	0.00310917441997409	2.35543516664704e-05	0.000164880461665293	0	0	0.00110705452832411	0	0	0	0	0	2.35543516664704e-05	0	0	0	0	0.000211989164998233	0.0021434460016488	0	2.35543516664704e-05	0	0	0.00228477211164763	0	0	0	0	0	0	0	2.35543516664704e-05	4.71087033329408e-05	0	0	4.71087033329408e-05
Flavonifractor_plautii	0.00266164173831115	0.000211989164998233	0.000164880461665293	0.000117771758332352	0	0	0.0006359674949947	0.000659521846661171	0	4.71087033329408e-05	0.00193145683665057	2.35543516664704e-05	9.42174066658815e-05	2.35543516664704e-05	0.000282652219997645	0.00598280532328348	0	0	0.00186079378165116	0.00110705452832411	0.00105994582499117	0.00374514191496879	0.00108350017665764	0.000329760923330585	0.000494641384995878	0.000329760923330585	0.00393357672830055	0.00438110940996349	0.00153103285832057	0.000989282769991756	2.35543516664704e-05	0.000282652219997645	0	2.35543516664704e-05	0.000541750088328819	0.0161818395948652	0.000282652219997645	0.000235543516664704	0.00211989164998233	2.35543516664704e-05	0.000918619714992345	0	0.000117771758332352	0.000282652219997645	0.000188434813331763	0.000117771758332352	0.000376869626663526	0	0.000447532681662937
Clostridium_perfringens	0	4.71087033329408e-05	0.111200094217407	0	0	4.71087033329408e-05	2.35543516664704e-05	0.00058885879166176	0	0	0	0	0.000141326109998822	0	0	2.35543516664704e-05	0	2.35543516664704e-05	0	2.35543516664704e-05	0	0	0	0.00131904369332234	2.35543516664704e-05	4.71087033329408e-05	0	0.000188434813331763	0	0	4.71087033329408e-05	0	0	4.71087033329408e-05	0	0	0	0	2.35543516664704e-05	2.35543516664704e-05	0	0.000282652219997645	0.00101283712165823	0.0012719349899894	0	0.015074785066541	0	0.000800847956659993	0
uncultured_bacterium_adhufec53.25	2.35543516664704e-05	4.71087033329408e-05	0	0	0	0	0	0	0	0	0.0210104816864916	0	2.35543516664704e-05	0	0	0	0.000141326109998822	0	0	9.42174066658815e-05	0	0	0.0291131786597574	0	0	0	0	0.00162525026498646	0	0	0	0.00287363090330939	0	0	0	2.35543516664704e-05	0	0	0	0	0	0.000188434813331763	0.000282652219997645	0	0	2.35543516664704e-05	0	0	0
uncultured_rumen_bacterium	0	4.71087033329408e-05	0	2.35543516664704e-05	0	2.35543516664704e-05	0	2.35543516664704e-05	0	0.0010363914733247	0.00310917441997409	4.71087033329408e-05	2.35543516664704e-05	0	0	0	4.71087033329408e-05	0	0	0.00242609822164645	0	0.000376869626663526	0.0157578612648687	0	4.71087033329408e-05	0	2.35543516664704e-05	0	2.35543516664704e-05	0	0.0162525026498646	0	0	4.71087033329408e-05	0	0	0.00061241314332823	0.000494641384995878	0	0.000329760923330585	2.35543516664704e-05	0.000164880461665293	0	0	0	0	0	2.35543516664704e-05	0
Eubacterium_ramulus	2.35543516664704e-05	0.00110705452832411	0	0.000683076198327641	0.0015074785066541	0	0.0010363914733247	0	0.0016723589683194	0.000659521846661171	0.000329760923330585	0.00204922859498292	0.00289718525497586	0	0.00138970674832175	0.000447532681662937	0.00134259804498881	0	0	0.000730184901660582	0.00131904369332234	0.000494641384995878	0.000871511011659404	0.00131904369332234	0.00379225061830173	9.42174066658815e-05	0	0.000565304439995289	0	0	4.71087033329408e-05	0.000235543516664704	0.00061241314332823	0.000164880461665293	0.00134259804498881	2.35543516664704e-05	0.00146036980332116	0.000400423978329996	0	0.00153103285832057	0	0.00146036980332116	0.000824402308326463	0.000141326109998822	0.00643033800494641	0.000259097868331174	0.00174302202331881	0.000541750088328819	0.000541750088328819
Lachnospiraceae_bacterium_TF01-11	0.0012719349899894	0	0	2.35543516664704e-05	0.000259097868331174	0	7.06630549994111e-05	2.35543516664704e-05	0	0	0	0	4.71087033329408e-05	2.35543516664704e-05	0	0	0.0010363914733247	0	0	0	0	2.35543516664704e-05	0	0	9.42174066658815e-05	2.35543516664704e-05	0	0.00110705452832411	0.00183723942998469	9.42174066658815e-05	0.000447532681662937	0.000259097868331174	0	0	4.71087033329408e-05	0	0.00296784830997527	0	0	0	0	7.06630549994111e-05	2.35543516664704e-05	0.000282652219997645	0.00195501118831704	0	0	0	0.000329760923330585
Fusobacterium_ulcerans	0.00138970674832175	0	0	0	0	0	0	0	0	2.35543516664704e-05	0	0	0	0.00579437050995171	0	4.71087033329408e-05	0	0	0	0	0	0	7.06630549994111e-05	2.35543516664704e-05	0	2.35543516664704e-05	0	0	0.00388646802496761	0	2.35543516664704e-05	0	0.00395713107996702	4.71087033329408e-05	0	0	0	0	0.0508067365445766	0	0	0	0	0	0.000188434813331763	0	0.00134259804498881	0	2.35543516664704e-05
uncultured_bacterium_adhufec37.25	0	0	2.35543516664704e-05	0.000164880461665293	0.00414556589329879	0	0	0	0	0	0.00176657637498528	0.000235543516664704	0	0	0.00129548934165587	0	0	0	0	4.71087033329408e-05	0	0	0.00282652219997645	0	0	0	0	0.00438110940996349	0	0	2.35543516664704e-05	9.42174066658815e-05	0	0	0	0	0.00176657637498528	0.000306206571664115	0	0.000541750088328819	0	0	0.000164880461665293	0.00626545754328112	0	0	0	0	0
Bacteroides_clarus	0	0	0	0	0	0	0	0	0	0	0	0	0	0	0	0	0	0	0	0.00807914262159934	0	0	0	0	0	0	0	0	0	0	2.35543516664704e-05	0	0	0.000164880461665293	0	0	0	0	0	0	0	0	2.35543516664704e-05	0.00058885879166176	0	0	0.0110940996349075	0	0
uncultured_bacterium_adhufec77.25	0	7.06630549994111e-05	0	0	0.000259097868331174	0	0.000164880461665293	0	0	0	0	0	0	0	0	0	0	0	0	0	0	0	0.00108350017665764	0	9.42174066658815e-05	0	0	4.71087033329408e-05	0	0	2.35543516664704e-05	0	0	0	0	2.35543516664704e-05	0	0	0	0	0	2.35543516664704e-05	0	0	0	2.35543516664704e-05	0	0	0
uncultured_Sutterella_sp.	0	2.35543516664704e-05	0	0	0	0.0128135673065599	0	0	0	0.000164880461665293	0	0	0	0	0	0	0	0	0	0	0	0	0	0	2.35543516664704e-05	0	0	0	2.35543516664704e-05	0	0	0	0	0	0	0	0	0	0	0	0	0	0	0	0	0	0	0	0
uncultured_Paludibacter_sp.	0	0	0	4.71087033329408e-05	0.000141326109998822	0	0	0	0	0.00110705452832411	2.35543516664704e-05	0	2.35543516664704e-05	0	4.71087033329408e-05	2.35543516664704e-05	9.42174066658815e-05	0	0	0.00435755505829702	0	0	0	0	0	0	0	0	0	0	0.00268519608997762	0.00513484866329054	0	0.000683076198327641	0	0	0	0.000259097868331174	0	0.000117771758332352	0	0	0	0.000989282769991756	0	2.35543516664704e-05	0	0	0.0031798374749735
Phascolarctobacterium_sp._377	0	0	0	0	0	0	0	0	0	0	0	0	0	2.35543516664704e-05	0	0	0	0	0	0	0	0	0	0	0	0	0	0	0	0	0	0	0	0	0	0	0	0	0	0.0138499587798846	0	0	0	0	0	0	0	0	0
Paraprevotella_xylaniphila	0	0	0	0	0	0	0	0	0	0	0	0	0	0	0	0	0	0	0	0	0.0114709692615711	0	0	0	0	0	0	0	0	0	0	0	0	0	0	2.35543516664704e-05	0	0	0	0	0	2.35543516664704e-05	0	0	0	0	0	2.35543516664704e-05	0
uncultured_Bacilli_bacterium	0	0.00138970674832175	0.000164880461665293	0	0	0	0	0	0	0	0	0.000282652219997645	9.42174066658815e-05	0.000164880461665293	2.35543516664704e-05	0.00310917441997409	0.000117771758332352	0.000164880461665293	4.71087033329408e-05	0	0	0	0.000164880461665293	0	0.000494641384995878	0.000259097868331174	2.35543516664704e-05	0	0.000164880461665293	0	0	0.000777293604993523	0	2.35543516664704e-05	0	0	0.0010363914733247	0	0	0.00355670710163703	0	0.00061241314332823	0	4.71087033329408e-05	2.35543516664704e-05	0.00287363090330939	2.35543516664704e-05	0.000211989164998233	2.35543516664704e-05
Clostridium_leptum	0	0.000306206571664115	0	4.71087033329408e-05	0	0	4.71087033329408e-05	0.000730184901660582	0	0.000423978329996467	0.000235543516664704	9.42174066658815e-05	2.35543516664704e-05	0	0.000824402308326463	0.000188434813331763	0	0	0	0.00287363090330939	0	0	0.0495819102579202	0	0	0.000141326109998822	0	0.000164880461665293	0	2.35543516664704e-05	0	2.35543516664704e-05	0	7.06630549994111e-05	0.000824402308326463	0	0.000117771758332352	0.000259097868331174	0.000282652219997645	2.35543516664704e-05	2.35543516664704e-05	0	0	9.42174066658815e-05	0	4.71087033329408e-05	0	0	0
Cronobacter_dublinensis	0	0.000329760923330585	0	2.35543516664704e-05	0	4.71087033329408e-05	0	0	2.35543516664704e-05	0	0	9.42174066658815e-05	2.35543516664704e-05	0.00346248969497115	2.35543516664704e-05	0	4.71087033329408e-05	0.007160522906607	0	4.71087033329408e-05	4.71087033329408e-05	0	4.71087033329408e-05	0	0.000777293604993523	0	0	2.35543516664704e-05	9.42174066658815e-05	4.71087033329408e-05	0.00061241314332823	0	0	0	0	9.42174066658815e-05	0.000706630549994111	0	0	0.000141326109998822	2.35543516664704e-05	0.00146036980332116	0.000329760923330585	0	0.000965728418325286	4.71087033329408e-05	0	0	0
Clostridium_ramosum	0.00219055470498175	0	0.000565304439995289	0	0	0.000282652219997645	9.42174066658815e-05	2.35543516664704e-05	0	0	7.06630549994111e-05	0	0.00228477211164763	2.35543516664704e-05	2.35543516664704e-05	0.000353315274997056	0.000824402308326463	7.06630549994111e-05	0.000565304439995289	0	0.000141326109998822	9.42174066658815e-05	9.42174066658815e-05	0.000117771758332352	0	2.35543516664704e-05	0.00115416323165705	0.000164880461665293	4.71087033329408e-05	0	4.71087033329408e-05	0	0.000494641384995878	0	0	0.000164880461665293	0	7.06630549994111e-05	0.00115416323165705	0	0.000306206571664115	0	0	0	2.35543516664704e-05	0	0.000235543516664704	0	0
Eubacterium_sp._517	0	0	0	0	0	0	0	0	0	0	0	0	0	0	0	0	0	0	2.35543516664704e-05	0	2.35543516664704e-05	0	0	0	0	0.000141326109998822	0	0	0	0	0.0100105994582499	0	0	0	2.35543516664704e-05	0	0	0	0	0	0	0	0	0	0	0	0	0	0
uncultured_Clostridiales_bacterium	0	0	0	9.42174066658815e-05	0	0	0	0	0	9.42174066658815e-05	0	0.000282652219997645	0	0	4.71087033329408e-05	0	0	0	0	0.00162525026498646	0	0	0	0	0	0	0	0	0	0	0.000353315274997056	0.000706630549994111	0	0	0	0	0	0.000706630549994111	0	0	0	0	0	0	0	9.42174066658815e-05	0	0	0
Desulfovibrio_piger	0	0.00061241314332823	0	0	0	0	0	0	0	0	4.71087033329408e-05	0	0	4.71087033329408e-05	0	0	0	0	0	0	0	0	0.00541750088328819	0	0	0.00551171828995407	0	0	0	0	0	0	0	0	0	0	0	0	0	0	0	0	0	0	0	0	0	0	0
bacterium_'New_Zealand_B'	0	0	0	0.0626781297844777	0	0	0	0	0	0	0	0	0	0	0	0	0	0	0	0	2.35543516664704e-05	0	0	0	0	0	0	0	0	0	0	0	0	0	0	0	0	0	0	0	0	0	0	0	0	0	0	0	0
uncultured_Lachnospiraceae_bacterium	2.35543516664704e-05	0	0	0.000188434813331763	0	0	0	0	0	0	0.000400423978329996	0.000376869626663526	7.06630549994111e-05	0	0.000353315274997056	0.0019079024849841	0	0	0	0.0031798374749735	0.000306206571664115	0	0.000659521846661171	2.35543516664704e-05	0	0	0	0.00117771758332352	0	0	0	0.000494641384995878	0	0.00101283712165823	0.000471087033329408	0	2.35543516664704e-05	0.000423978329996467	0.000423978329996467	0	0	4.71087033329408e-05	0.000141326109998822	0.000282652219997645	0	0.000518195736662348	2.35543516664704e-05	0	0
Eggerthella_lenta	9.42174066658815e-05	0	2.35543516664704e-05	0	4.71087033329408e-05	0	2.35543516664704e-05	0	0	2.35543516664704e-05	9.42174066658815e-05	0.000235543516664704	4.71087033329408e-05	0	4.71087033329408e-05	0.000423978329996467	0	0	0.00058885879166176	0	0.000447532681662937	0.000895065363325874	2.35543516664704e-05	0.000211989164998233	0	0	7.06630549994111e-05	7.06630549994111e-05	4.71087033329408e-05	9.42174066658815e-05	0	0	0.000164880461665293	4.71087033329408e-05	0	0	4.71087033329408e-05	2.35543516664704e-05	9.42174066658815e-05	0.000164880461665293	0.000659521846661171	0	0	0.000117771758332352	4.71087033329408e-05	0	0.000164880461665293	2.35543516664704e-05	0.000117771758332352
Bacteroides_nordii	0.00628901189494759	0	0	7.06630549994111e-05	2.35543516664704e-05	0	0	4.71087033329408e-05	0	0	0.000541750088328819	0	0	0	0.000141326109998822	0	0	0	0	0.000989282769991756	0	0	0.000706630549994111	0	2.35543516664704e-05	2.35543516664704e-05	0	0	0	0	0.000117771758332352	0	0	0.000683076198327641	7.06630549994111e-05	0	0.00169591331998587	0.000918619714992345	0	0.000188434813331763	0	4.71087033329408e-05	2.35543516664704e-05	0	0	0	0	0	0
uncultured_Desulfovibrio_sp.	0	0	0	0.000895065363325874	0.00285007655164292	0	0.000965728418325286	2.35543516664704e-05	0	0	0	0	0	0	0	0	0	0	0	0.00280296784830998	0	0	0	0	0	0	0	0	0	0	0.00259097868331174	4.71087033329408e-05	0	0	0	0	0	0	0	0	0	0	0	0	0	0	0	0	0
bacterium_enrichment_culture_clone_PCE9_C5	0	0	0	0	2.35543516664704e-05	0	0	0	0	0.00146036980332116	0	0	0	0	0	0	0.000164880461665293	0	0	0.00475797903662702	0	0	0	0	0	0	0	0	0	0	0.00223766340831469	0	0	0	0	0	0	0	0	0	0	0	0	0	0	0	0	0	0
Raoultella_ornithinolytica_B6	0	0.0105287951949123	0	2.35543516664704e-05	0	2.35543516664704e-05	2.35543516664704e-05	0	0	0	0	4.71087033329408e-05	0.000164880461665293	0.000989282769991756	0	0.00124838063832293	0	0.00680720763160994	0	0	0	0	0	0	0.00108350017665764	4.71087033329408e-05	4.71087033329408e-05	7.06630549994111e-05	2.35543516664704e-05	4.71087033329408e-05	0.000235543516664704	2.35543516664704e-05	2.35543516664704e-05	0	0	9.42174066658815e-05	0.00058885879166176	0	0	0.000683076198327641	0	0.000400423978329996	0.000164880461665293	2.35543516664704e-05	0.0122718172182311	4.71087033329408e-05	0	2.35543516664704e-05	0
uncultured_Lactonifactor_sp.	0	0	0.00223766340831469	4.71087033329408e-05	2.35543516664704e-05	0	0	7.06630549994111e-05	0	4.71087033329408e-05	2.35543516664704e-05	0	0.00164880461665293	0.000188434813331763	9.42174066658815e-05	0.000117771758332352	0	0	0.000494641384995878	2.35543516664704e-05	0	0	4.71087033329408e-05	4.71087033329408e-05	0	7.06630549994111e-05	0.00162525026498646	4.71087033329408e-05	0.000800847956659993	0.000706630549994111	0	0	0	2.35543516664704e-05	2.35543516664704e-05	0.0016723589683194	0	2.35543516664704e-05	0.000447532681662937	2.35543516664704e-05	0.0010363914733247	0	0	4.71087033329408e-05	0.00499352255329172	0	0.000518195736662348	0	7.06630549994111e-05
Clostridium_innocuum	0.00110705452832411	0	0.00115416323165705	4.71087033329408e-05	2.35543516664704e-05	7.06630549994111e-05	0	0.000117771758332352	0	2.35543516664704e-05	0.000141326109998822	4.71087033329408e-05	9.42174066658815e-05	0.000471087033329408	0	0.000188434813331763	2.35543516664704e-05	0	0.0025438699799788	7.06630549994111e-05	9.42174066658815e-05	7.06630549994111e-05	7.06630549994111e-05	0.000471087033329408	0	0.000494641384995878	0.00244965257331292	0.000353315274997056	0.000494641384995878	0.000329760923330585	4.71087033329408e-05	0	0.000423978329996467	0	2.35543516664704e-05	0.00101283712165823	0.000117771758332352	2.35543516664704e-05	0.000494641384995878	9.42174066658815e-05	0.000400423978329996	0	0	2.35543516664704e-05	0.000117771758332352	2.35543516664704e-05	0.000259097868331174	0	0
Adlercreutzia_equolifaciens	0	2.35543516664704e-05	0	0.000447532681662937	0.00228477211164763	0	9.42174066658815e-05	0.00105994582499117	0	2.35543516664704e-05	2.35543516664704e-05	0	0	0	0.000164880461665293	0.000353315274997056	2.35543516664704e-05	0	0	7.06630549994111e-05	0	0	0.00124838063832293	0	0	2.35543516664704e-05	0	0	0	2.35543516664704e-05	0	0	0	0.000188434813331763	0.000117771758332352	0.000141326109998822	0.000306206571664115	0.000306206571664115	0	0	0	2.35543516664704e-05	0.000282652219997645	0.000211989164998233	0	4.71087033329408e-05	0	0	0.000659521846661171
Clostridiaceae_bacterium_NML_061030	0.000989282769991756	2.35543516664704e-05	0	7.06630549994111e-05	0.000282652219997645	0	0	0	0	4.71087033329408e-05	0.000164880461665293	0	0	0	0.000329760923330585	0.00259097868331174	0	2.35543516664704e-05	0.0025438699799788	0.000259097868331174	4.71087033329408e-05	0.000447532681662937	0.000188434813331763	0.000730184901660582	0	0.000518195736662348	0	0.00179013072665175	9.42174066658815e-05	0.000847956659992934	0	0	0	2.35543516664704e-05	0	0	0.000141326109998822	7.06630549994111e-05	0.000777293604993523	4.71087033329408e-05	0.000211989164998233	0	9.42174066658815e-05	0.000188434813331763	2.35543516664704e-05	9.42174066658815e-05	0	0	9.42174066658815e-05
Lactobacillus_oris	0	0.00452243551996231	0	0	0	0	0	0	0	0	0	0.000353315274997056	2.35543516664704e-05	4.71087033329408e-05	0	0	0	0	2.35543516664704e-05	0.000211989164998233	0	0.000918619714992345	0	0	0	0	0	0	0	7.06630549994111e-05	0.000282652219997645	0	0	0	0	0	2.35543516664704e-05	0	0	0	0	0	0	0	0	2.35543516664704e-05	0	0	0
Alistipes_indistinctus	0	9.42174066658815e-05	0	0	0.000188434813331763	0	0	0	0	0.000164880461665293	0	2.35543516664704e-05	0	0	0	0	7.06630549994111e-05	2.35543516664704e-05	0	0.000141326109998822	0	0	0	0	0	0	0	0	0	0	0.000659521846661171	0	0	0.000777293604993523	0.000471087033329408	0	2.35543516664704e-05	0	0	0	0	0	9.42174066658815e-05	9.42174066658815e-05	0	0.000235543516664704	0	0	0
Candidatus_Alistipes_marseilloanorexicus_AP11	0	2.35543516664704e-05	0	7.06630549994111e-05	0.00124838063832293	0	9.42174066658815e-05	0	0	0	2.35543516664704e-05	0	0	2.35543516664704e-05	0.000164880461665293	0	0	2.35543516664704e-05	0	0.00188434813331763	0.000353315274997056	0	0.000400423978329996	0	0	0.00379225061830173	0	0	0	0	0.000188434813331763	9.42174066658815e-05	0	0	0	0	0	0.000235543516664704	0	0.000188434813331763	0	0	0	0.0010363914733247	0	0	0	0	0.00129548934165587
Parabacteroides_goldsteinii	0	0	0	0	0	0	0	0.000188434813331763	0	0	0.00061241314332823	0	0.000141326109998822	0	0	0.00171946767165234	0.000141326109998822	0	0	0.00598280532328348	0.000117771758332352	0	0	0	0	0	0	0	0	0	0	0	0	0	0	0	0	0	0	0	0	4.71087033329408e-05	0	0.000730184901660582	0	0	0	0	0
Mitsuokella_jalaludinii	0	0	0	0	0	0	0	0	0	0.000800847956659993	0	0	0	0	0	0	0	0	0	0	0	0	0	0	0	0	0	0	0	0	0	0	0	0	0	0	0	0	0	0	0	0	0	0	0	0	0	0	0
Lachnospiraceae_bacterium_DJF_CP76	0	7.06630549994111e-05	0	0.000117771758332352	0.000376869626663526	0	4.71087033329408e-05	0	0	2.35543516664704e-05	0.000306206571664115	0.000282652219997645	0.000306206571664115	2.35543516664704e-05	0.000282652219997645	4.71087033329408e-05	9.42174066658815e-05	0	0	0.000376869626663526	0	7.06630549994111e-05	2.35543516664704e-05	0	4.71087033329408e-05	0	0	7.06630549994111e-05	0.00131904369332234	0	0.000117771758332352	2.35543516664704e-05	0	0.000259097868331174	0.000141326109998822	0	0.000235543516664704	0.000376869626663526	0	0.000141326109998822	0	0.000659521846661171	7.06630549994111e-05	0.000141326109998822	0	0.000141326109998822	0	0	4.71087033329408e-05
uncultured_Bacillales_bacterium	0	0	0	0	0	0	0	0	0	0	0	0	0	0	0	0	0	0	0	0	0	0	0	0	0	0	0	0	0	0	0.000188434813331763	0	0	0	0	0	0	7.06630549994111e-05	0	0	0	0	0	0	0	0	0	0	0
Alistipes_sp._cv1	0	0	0	0	0.000965728418325286	0	0	0.000188434813331763	0	0	0	0	0	0	0	0	0	0	0	0.00320339182663997	0	0	0	0	0	0.000235543516664704	0	0	0	0	0	0.000259097868331174	0	2.35543516664704e-05	0	0	0	0	0.00108350017665764	0	0	0	0.000494641384995878	0.000306206571664115	0	0	0	0	9.42174066658815e-05
bacterium_P1A6	0.00197856553998351	0	0	0	0	0	0	0.000541750088328819	0	0	0	4.71087033329408e-05	0	0	0	0.000259097868331174	0	0	0	0	0	0	0	0.000235543516664704	0	0	0	0.000447532681662937	0.00282652219997645	0	0	0	0	0	0	0	4.71087033329408e-05	0	0.0016723589683194	0	0	0	0	7.06630549994111e-05	0	0	0	0	0
unidentified_rumen_bacterium_RFN71	0	0	0	2.35543516664704e-05	0	0	0	0	0	0	0	0	0	0	0	0	0	0	0	0.00105994582499117	0	0	0	0	0	0	0	0	0	0	0.00153103285832057	0	0	0	0	0	0	0	0	0	0	0	0	0	0	0	0	0	2.35543516664704e-05
Methanobrevibacter_smithii	0	0	0	0	0	0	0	0	0	0.000141326109998822	0	0.000282652219997645	0	0	0	0	0.000211989164998233	0	0	0	0	0	0	0	0	0	0	0	0	0	0.000329760923330585	2.35543516664704e-05	0	0	0	0	0	0	0	0	0	0	0	0	0	0	0	0	0
Lactobacillus_plantarum_WCFS1	0	0	0	0	0	0	0	0	0	0	0	2.35543516664704e-05	0	0	0	0	0	0	0	0	0	0	0	0	0	0	0	2.35543516664704e-05	0	0	0	0	0	0	0	0	0	9.42174066658815e-05	0	2.35543516664704e-05	0	0	0	0	0.000117771758332352	0	0	0	0
Clostridium_symbiosum	0.00237898951831351	2.35543516664704e-05	0.000659521846661171	0	0	0	2.35543516664704e-05	0.000117771758332352	2.35543516664704e-05	0	2.35543516664704e-05	0	0	0.000164880461665293	0	4.71087033329408e-05	0	0	9.42174066658815e-05	0	4.71087033329408e-05	0.000753739253327052	2.35543516664704e-05	4.71087033329408e-05	0	0	0	0.000541750088328819	0	0.000518195736662348	0	0	0	0	0	0.00204922859498292	0	0	0.000211989164998233	0	0	0	0	4.71087033329408e-05	0	0	0.000400423978329996	0	0
Lactococcus_garvieae	0	4.71087033329408e-05	0	0	0	0	0	0	0.000164880461665293	0	0	0	0	0.00423978329996467	0	0	2.35543516664704e-05	0	0	0	0	2.35543516664704e-05	0	0	0.000282652219997645	4.71087033329408e-05	0	0	7.06630549994111e-05	0	4.71087033329408e-05	0	0	0.000282652219997645	0	0	0.000164880461665293	0	0	0.00120127193498999	0	4.71087033329408e-05	2.35543516664704e-05	4.71087033329408e-05	7.06630549994111e-05	2.35543516664704e-05	0	0	0
Sutterella_parvirubra	0	0	0	0	0	0	0	0	0	0	0	0	0	0	0	0	0	0	0	0	0	0	0	0	0	0	0	0	0	0	0	0	0	0	0	0	0	0	0	0	0	0	2.35543516664704e-05	0	0	0	0	0	0
Prevotella_sp._DJF_B116	0	0	0	0	0	0	0	0	0	0	0	0	0	0	0	0	0	0	0	0	2.35543516664704e-05	0	0	0	0	0	0	0	0	0	0.00645389235661288	0	0	0	0	0	0	0	0	0	0	0	0	0	0	0	0	0	0
Parasutterella_secunda	0	0	0	0	0	0	0	0	0	0	0	0	0	2.35543516664704e-05	0	0	0.000376869626663526	0	0	0	0	0	0	0	0	2.35543516664704e-05	0	2.35543516664704e-05	0	0	0.0128371216582264	0	0	0	0	0	0	0	0	0	0	0	0	0	0	0.000471087033329408	0	0	0
swine_fecal_bacterium_SD-Xyl6	0	0	0	0	0	0	0	0	0	0	0	0	0	0	0	0	0	0	0	0	0	0	0	0	0	0.000164880461665293	0	0	0	0	0.00727829466493935	0	0	0	0	0	0	0	0	0	0	0	0	0	0	0	0	0	0
Coprobacillus_cateniformis	2.35543516664704e-05	0	0	0	0	0	0	2.35543516664704e-05	0	0	0	0	7.06630549994111e-05	0	0	0.000164880461665293	0	0.00226121775998116	9.42174066658815e-05	0.00186079378165116	2.35543516664704e-05	4.71087033329408e-05	9.42174066658815e-05	2.35543516664704e-05	0	0.000188434813331763	0	4.71087033329408e-05	0	0	0	0.00101283712165823	0	0	0	7.06630549994111e-05	0	0	0	0	4.71087033329408e-05	2.35543516664704e-05	0.000447532681662937	0	0	0	0	0	0
unidentified_bacterium	0	0	0	0	0.000400423978329996	0	0	0	0	0	0	0	0	0	0	0	0	0	0	0.000117771758332352	0	0	0	0	0	0	0	0	0	0	0.00146036980332116	0	0	0	0	0	0	2.35543516664704e-05	0	0	0	0	0	0.000259097868331174	0	0	0	0	0
Collinsella_intestinalis	0	0	0	0	0	0.000494641384995878	0	0	0	0	0	0	0	0	2.35543516664704e-05	0	0	0	0	0	0	0	0	2.35543516664704e-05	0	0	0	0	0	0	0	0	0	0	0	0.0090684253915911	0	0	0	0	0	0	0	0.000141326109998822	0	0	0	0	0
Parabacteroides_gordonii	0	0	0	0	0.000895065363325874	0	0	0	0	2.35543516664704e-05	0.000141326109998822	0	2.35543516664704e-05	2.35543516664704e-05	0	0.000117771758332352	0	0	0	4.71087033329408e-05	0	0	0	0	0	0	0	0	0.000400423978329996	0	0	0	0	0	0.000117771758332352	0	0	0	0	0	0	0	0	0	0	0.000211989164998233	0	0	0
Clostridium_sp._ID5	0	0	0	0	0	0	0	0	0	0	0.00110705452832411	0	0	0	0.000259097868331174	0.00350959839830409	0	0	0	0	0	0	0	0	0	0	0	0	0	0	0	0	0	0	0	0	0	0	0	0	0	0	0	0	0	0	0	0	0
Clostridium_scindens	0	0	0	0	0	0	0	0	0	0	0	0	0	0	0	0.000730184901660582	0	0	0	0	0	0	2.35543516664704e-05	0	0	0	0	0	0	0	0	0	0	0	0	0	0	0	0.00233188081498057	0	0	0	0	0	0	0	0	0	0
Bacteroides_faecis	0	0	0.000141326109998822	7.06630549994111e-05	4.71087033329408e-05	2.35543516664704e-05	0.000494641384995878	2.35543516664704e-05	0	0	0	9.42174066658815e-05	0.000164880461665293	0	0.000188434813331763	9.42174066658815e-05	0.000117771758332352	0	0	0	0.00101283712165823	2.35543516664704e-05	0	2.35543516664704e-05	2.35543516664704e-05	4.71087033329408e-05	9.42174066658815e-05	0.000895065363325874	0.000235543516664704	0	0	0.000188434813331763	0	2.35543516664704e-05	0	0	0.000164880461665293	2.35543516664704e-05	0	0	7.06630549994111e-05	0	2.35543516664704e-05	0.000259097868331174	2.35543516664704e-05	0	0	0	0
Victivallis_vadensis	0	0	0	0	4.71087033329408e-05	0	0	0	0	0.000353315274997056	0	0	0	0	0	0	2.35543516664704e-05	0	0	0.00162525026498646	0	0	0.000117771758332352	0	0	0.00223766340831469	0	0	0	0	0.000164880461665293	0	0	0	0	0	0	0.000471087033329408	0	0	0	0	0	0	0	0	0	0	0
Clostridium_butyricum	0	0	0	0	0	0.00791426215993405	0	0	0	0	0	0	0	0	0	0	9.42174066658815e-05	0	0	0	0	0	0	0	0.00188434813331763	2.35543516664704e-05	0.000164880461665293	0	0	0	0	0	2.35543516664704e-05	0	0	0	0	0	0	0	9.42174066658815e-05	0	0	0	0	0	0	0	0
Bacteroidaceae_bacterium_DJF_B220	0	0	0	0	0	0	0	0	0	0	0	0	0	0	0	0	0	0	0	0	0	0	0	0	2.35543516664704e-05	0	0	0	0	0	2.35543516664704e-05	0	0	0	0	0	0	0	0	0	0	2.35543516664704e-05	0	0	0	0	0	0	0
uncultured_Clostridia_bacterium	0.000494641384995878	0	0	2.35543516664704e-05	0.000753739253327052	0	0	4.71087033329408e-05	0	2.35543516664704e-05	0.000188434813331763	9.42174066658815e-05	4.71087033329408e-05	0	0	0.000211989164998233	0	0	2.35543516664704e-05	0.000235543516664704	2.35543516664704e-05	4.71087033329408e-05	4.71087033329408e-05	0	4.71087033329408e-05	0	0	4.71087033329408e-05	0	0	0	0.000164880461665293	0.000211989164998233	0.000188434813331763	0	0	0.000188434813331763	0.000117771758332352	0	2.35543516664704e-05	0	2.35543516664704e-05	0	2.35543516664704e-05	2.35543516664704e-05	7.06630549994111e-05	0	7.06630549994111e-05	0.000117771758332352
uncultured_Campylobacter_sp.	0	0	0	0.000117771758332352	0	0	0	0	0	0	0	0	0	0	0	0	0	0	0	0	0	0	0	0	0	0	0	0	0	0	0	0	0	0	0	0	0	0	0	0	0	0	0.000117771758332352	0	0	0.000423978329996467	0	0	0
Leuconostoc_lactis	0	0.0010363914733247	0	0	0	0	0	0	0	0	2.35543516664704e-05	0	0	0.000329760923330585	2.35543516664704e-05	4.71087033329408e-05	0	0	0.000188434813331763	0	0	0	2.35543516664704e-05	0	9.42174066658815e-05	7.06630549994111e-05	0	0	0	0	0	2.35543516664704e-05	0	4.71087033329408e-05	0	0	0.000423978329996467	0	0	0.000471087033329408	0	0.000164880461665293	0	4.71087033329408e-05	0	0	0	0	0
uncultured_Sarcina_sp.	0	0	0	0	0.00871511011659404	0	0	0	0	0	0	2.35543516664704e-05	0	0	0	0	0	0	0	0	0	0	0	0	0	0	0	0	0	0	0	0	2.35543516664704e-05	0	0	0	0	0	0	0	0	0	0	0	0	0	0	0	0
Slackia_isoflavoniconvertens	0	0	0	0	0	0	0	0	0	4.71087033329408e-05	0	0	0	0	0	0	2.35543516664704e-05	0	0	2.35543516664704e-05	0	0	0	0	0	7.06630549994111e-05	0	0	0	0	4.71087033329408e-05	0.0006359674949947	0	0	0	0	0	0	0	0	9.42174066658815e-05	0	0	0	0	0	0	0	0
uncultured_Turicibacter_sp.	0	0	0	0	0	0	0	0	0	0	0	0.000117771758332352	0	0	0	0	0.000400423978329996	0	0	0	0	0	0	0	0	0	0	0	0	0	0	0	0	0	0	0	0	0	0	0	0	0	0	0	0	0	0	0	0
Bacteroides_oleiciplenus	0	0	0	0.000235543516664704	0	0	0	0	0	0	0	0	0	0	0	0	0	0	0	7.06630549994111e-05	0	0	0	0	0	0	0.000117771758332352	0	0	0	0	0	0	0	0	0	0	0	0	0.000423978329996467	0	0	0	0	0	0	0.000659521846661171	0	0
Clostridium_lavalense	0.000353315274997056	0	0	2.35543516664704e-05	0	0	0	0	0	0.000117771758332352	4.71087033329408e-05	4.71087033329408e-05	2.35543516664704e-05	0	4.71087033329408e-05	0.000282652219997645	2.35543516664704e-05	0	0	0.000188434813331763	0	7.06630549994111e-05	4.71087033329408e-05	0.000117771758332352	0	0	0	0.000753739253327052	0.000211989164998233	0	0	7.06630549994111e-05	0	0	2.35543516664704e-05	0	4.71087033329408e-05	0	0.000282652219997645	0	0	0	2.35543516664704e-05	0.000117771758332352	0	2.35543516664704e-05	0.000117771758332352	0	2.35543516664704e-05
Clostridium_baratii_str._Sullivan	0	0	2.35543516664704e-05	0	0	0	0	0	0	0	0	0	0	0	0	0	0	0	0	0	0	4.71087033329408e-05	0	0.000282652219997645	0	0	4.71087033329408e-05	0	2.35543516664704e-05	0	0	0	0	0	0	0.000259097868331174	0	0	0	0	0	7.06630549994111e-05	0	0.000235543516664704	4.71087033329408e-05	2.35543516664704e-05	0	0	0
Victivallaceae_bacterium_NML_080035	0	0	0	0	0	0	0	0	0	0	0	0	0	0	0	0	0	0	0	0	0	0	0	0	0	0.000259097868331174	0	0	0	0	4.71087033329408e-05	0	0	0	0	2.35543516664704e-05	0	0	0	0	0	0	0	0	0	0	0	0	2.35543516664704e-05
Veillonella_rogosae	0	0	0.00193145683665057	0	2.35543516664704e-05	0	0	0	0	0	0	0	0	0	0	0	2.35543516664704e-05	7.06630549994111e-05	4.71087033329408e-05	0	2.35543516664704e-05	7.06630549994111e-05	0	4.71087033329408e-05	0	0	0	0	0	2.35543516664704e-05	0	0	0.000353315274997056	0	0	0.000282652219997645	9.42174066658815e-05	0	0	0	0	7.06630549994111e-05	0	7.06630549994111e-05	4.71087033329408e-05	0.000211989164998233	2.35543516664704e-05	2.35543516664704e-05	0
uncultured_bacterium_adhufec311	0	0	0	9.42174066658815e-05	0.000471087033329408	0	0	0	0	0	0	0	0	0	0.000329760923330585	0.00299140266164174	0	0	0	0.000659521846661171	0	0	0.000188434813331763	0	0	0	0	0	0	0	4.71087033329408e-05	0	0	0	0	0	0	0	0	0	0	0	0	2.35543516664704e-05	0	0	0	0	0
Bifidobacterium_animalis	0	0	0	0	0	0	0	0	0	0	0	2.35543516664704e-05	0	0	0	0	0	0	0	0	0	0	0	0	0	0	0	0	0	0	0	0	2.35543516664704e-05	0	0	0	0	0	0	0	0	0	0	0	0	0	0	4.71087033329408e-05	0
Clostridium_spiroforme	2.35543516664704e-05	0	0	0	0	0	0	0	0	0	7.06630549994111e-05	0	0	4.71087033329408e-05	0	0	0	0	0	2.35543516664704e-05	0	0	4.71087033329408e-05	0	2.35543516664704e-05	0	0	0.000471087033329408	0	0	0	0	2.35543516664704e-05	0	0.000211989164998233	0.00129548934165587	0.000494641384995878	0	0	0	0	0	0	0	2.35543516664704e-05	0	0	0	0
Bacteroides_sartorii	0	0	0	0	0	0	0.000306206571664115	0.000541750088328819	0	0	0	0.000117771758332352	0.000282652219997645	0	0	4.71087033329408e-05	0	0	0	2.35543516664704e-05	0	0	0	0	0	4.71087033329408e-05	0	0	0	0	0	0	0	0	2.35543516664704e-05	0	0	2.35543516664704e-05	0	0	0	0	0	0	0	0	4.71087033329408e-05	0	4.71087033329408e-05
uncultured_Desulfovibrionaceae_bacterium	0	0.000141326109998822	0	0	0	0	2.35543516664704e-05	0	0	7.06630549994111e-05	0	0	0	0	2.35543516664704e-05	0	0	0	0	0.000471087033329408	0	0	0	0	0	0	0	0	0	0	2.35543516664704e-05	2.35543516664704e-05	0	0	0	0	0	0	0	0.000141326109998822	0	0	0	2.35543516664704e-05	0	0	0	0	0
Alistipes_inops	0	0	0	0	0	0	0	0	0	0	0	0	0	0	0.00138970674832175	0	0	0	0	0	0	0	0	0	0	0	0	0	0	0	0	0	0	0	0	0	0	0	0	0	0	0	0	0	0	0	0	0	0
Lactobacillus_iners	0.000306206571664115	0	0	0	0	0	0	0	0.000211989164998233	9.42174066658815e-05	0	9.42174066658815e-05	0	0	2.35543516664704e-05	2.35543516664704e-05	0	0.000306206571664115	0.000353315274997056	0	0	2.35543516664704e-05	0	0.000117771758332352	0.000141326109998822	0	0.000423978329996467	0.000188434813331763	0.000282652219997645	0	0	0	0.000329760923330585	2.35543516664704e-05	2.35543516664704e-05	0	0.000329760923330585	0.000211989164998233	0	2.35543516664704e-05	0	0	0	0	0	0	0	0	0.000141326109998822
Eubacterium_sp._1-3	0	0	0	0	0	0	0	0	0	0	0	0	0	0	0	0	0	0	0	0	0	0	0	0	0	0	0	0.000117771758332352	0.0006359674949947	0	0	0	0	0	0	0	0	0	0.00169591331998587	0	2.35543516664704e-05	0	0	0	0	0	0	0	0
Collinsella_tanakaei	0	0	0	0	0	0	0	0	0	0	0	0	0	0	0	0	0	0	0	0	0	0	0	0	0	0	0	0	0	0	0	0	0	0	0.000188434813331763	0	0	4.71087033329408e-05	0	0	0	0	0	0	0	0	0	0	0
bacterium_R2	0	0	0	0	0	0	0	0	0	0.000164880461665293	0	0	0	0	0	0	2.35543516664704e-05	0	0	0.000329760923330585	0	0	0	0	0	7.06630549994111e-05	0	0	0	0	0.000164880461665293	0	0	0	0	0	0	0	0	0	0	0	0	0	0	0	0	0	0
Streptococcus_mutans	0	0	0	0	2.35543516664704e-05	0	2.35543516664704e-05	0	0	0	0	0	0	2.35543516664704e-05	0	2.35543516664704e-05	0	0	0.000164880461665293	0	0	0	0	0	0	0	0	2.35543516664704e-05	0	0	2.35543516664704e-05	0	4.71087033329408e-05	0	0	0	7.06630549994111e-05	2.35543516664704e-05	0	0	0	2.35543516664704e-05	0	0	2.35543516664704e-05	0.000141326109998822	0	0	2.35543516664704e-05
uncultured_Thermoanaerobacteriales_bacterium	0	0	0	0	4.71087033329408e-05	0	0	0	0	0	2.35543516664704e-05	2.35543516664704e-05	0	0	0	0	0	0	0	0.00320339182663997	0	0	0	0	0	0	0	0	0	0	7.06630549994111e-05	0	0	0	0	0	0	7.06630549994111e-05	0	0	0	0	0	0	0	0	0	0	0
uncultured_prokaryote	0	0	0	0.000117771758332352	0	0	0	0	2.35543516664704e-05	4.71087033329408e-05	0	0	2.35543516664704e-05	7.06630549994111e-05	4.71087033329408e-05	9.42174066658815e-05	0	0	0	0.000164880461665293	0	0	4.71087033329408e-05	0	0	0	0	0	0	0	2.35543516664704e-05	0	0	0	0	0	0	2.35543516664704e-05	0	9.42174066658815e-05	0	0	2.35543516664704e-05	0	0	0	0	0	0
Clostridium_sp._BR31	0	0	0	0	0	0	0	0	0	0	0	0	0	0.00113060887999058	0	2.35543516664704e-05	0	0	0	0	0	0	0	2.35543516664704e-05	2.35543516664704e-05	0	0	0.000141326109998822	0	0	0	0	0	0	0	0.00244965257331292	9.42174066658815e-05	0	0	0	0.000235543516664704	0	0	2.35543516664704e-05	0	2.35543516664704e-05	0	0	0
bacterium_YE57	0	0	0	0	0	0	0	0	0	0	0	0	0	0	0	0	0	0	0	0.00414556589329879	0	0	0	0	0	0	0	0	0	0	0.000164880461665293	0	0	0	0	0	0	0	0	0	0	0	0	0	0	0	0	0	0
uncultured_Prevotellaceae_bacterium	0	0	0	0	0	0	0	0	0	0	0	0	0	0	0	0	0	0	0	0	0	0	0	0	0	0	0	0	0	0	0	0	0	0	0	0	0	0	0	0	0	0	0	0	0	0	0	0	0
Eubacterium_dolichum	0	0	0	0	0	0	0	0	0	0	0	0	0	0	0	0	0	0	0	0	0	2.35543516664704e-05	0	0	0	0	0	0	0	0.00120127193498999	0	0	0	0	0	0	0	0	0	0	0.000117771758332352	0	0	0	9.42174066658815e-05	0	0	0	0
bacterium_IARFR2474	0	0	0	0	0	0	0	0	0	0	0	0	0	0	0	0	0	0	0	0	0	0	0	0	0	0	0	0	0	0	0.000730184901660582	0	0	0	0	0	0	0	0	0	0	0	0	0	0	0	0	0	0
Lactobacillus_coleohominis	0	0	0	0	0	0	0	0	0	0	0	0	0	0	0	0	0	0	0	0	0	0	0	0	0	0	0	0	0	0	0	0	0	0	0	0	0	0	0	0	0	0	0	0	0	0	0	0	0
uncultured_Tenericutes_bacterium	0	0	0	0	0	0	0	0	0	0	0	0	0	0	0	0	0	0	0	0	0	0	0	0	0	0	0	0	0	0	0	0	0	0	0	0	0	0	0	0	0	0	0	0	0	0	0	0	0
uncultured_methanogenic_archaeon	0	0	0	0	0	0	0	0	0	0	0	0	0	0	0	0	0.000141326109998822	0	0	0	0	0	0	0	0	0	0	0	0	0	7.06630549994111e-05	0	0	0	0	0	0	0	0	2.35543516664704e-05	0	0	0	0	0	0	0	0	0
uncultured_Synergistes_sp.	2.35543516664704e-05	0	0	0	0	0	9.42174066658815e-05	0	0	0	0	0	0	0	0	0	0	0	0	4.71087033329408e-05	0	0	0	0	0	0	0	0	0	0	9.42174066658815e-05	0	0	7.06630549994111e-05	0	0.000306206571664115	0	0	0	0	2.35543516664704e-05	0	4.71087033329408e-05	0	0	2.35543516664704e-05	0	0	0
Prevotellaceae_bacterium_DJF_CR25	0	0	0	0	0	0	0	0	0	0	0	0	0	0	0	0	0	0	0	0	0	0	0	0	0	0	0	0	0	0	0	0	0	0.0038158049699682	0	0	0	0	0	0	0	0	0	0	0	0	0	2.35543516664704e-05	0
Lactobacillus_fermentum	0	0	0	0	0	0	0	0	0	0	0	9.42174066658815e-05	0	0	0	0	0	0	0	0	0	0	0	0	0	0	0	0	0	0	0	0	2.35543516664704e-05	0	0	0	0	0	0	0	0	0	0	7.06630549994111e-05	0	0	0	0	0
uncultured_bacterium_adhufec43	0	4.71087033329408e-05	0	7.06630549994111e-05	0	0	0	0	0.0006359674949947	2.35543516664704e-05	0	0	0	0	7.06630549994111e-05	0	0	0	0	0	0	0	0	0	0	4.71087033329408e-05	0	0	0	0	0	0	0	7.06630549994111e-05	4.71087033329408e-05	0	0	4.71087033329408e-05	0	0	0	7.06630549994111e-05	0	0	0	0.000117771758332352	0	4.71087033329408e-05	0
uncultured_Erysipelotrichaceae_bacterium	0	0	0	0.000423978329996467	0.000400423978329996	0	0	0	0	0	0	0	0	0	0.000235543516664704	0	4.71087033329408e-05	0	0	0	0	0	0	2.35543516664704e-05	0	0	0	4.71087033329408e-05	0	0	0	0	2.35543516664704e-05	0	0	0	0.000306206571664115	0	0	0	0	0	0	0	0	0	0	0	0
Eubacterium_sp._WAL_14571	0	0	0	0	0	0	0	0	0	0	0	0	0	0	0	0.00211989164998233	0	0	0	0	0	0	2.35543516664704e-05	0	0	0	0	0	0	0	0	0	0	0	0	0	0	0	0.000376869626663526	0	0	0	0	0	0	0	0	0	0
Prevotella_bivia	0	0	0	0	0	0	0	0	0	0	0	0	0	0.000188434813331763	0	0.000188434813331763	0	0	0	0	0	0.000117771758332352	0	0	0	0	0	0	0	0	0	2.35543516664704e-05	0	0	0	4.71087033329408e-05	0	0	0	0	0	0	0	0	0.000117771758332352	0	0	0	0
Cloacibacillus_evryensis	0	0	0	0	0	0	0	0	0	0	0	0	2.35543516664704e-05	0	0	0	0	0	0	0	0	0	0	0	0	0	0	0	0.000282652219997645	0	0	0	0	0	0	0	0	0	0	0	0	0	0	0	0	0	0	2.35543516664704e-05	0
Solobacterium_moorei	2.35543516664704e-05	0	2.35543516664704e-05	0	0	0	2.35543516664704e-05	0	0	0	0	2.35543516664704e-05	2.35543516664704e-05	2.35543516664704e-05	0	0	0	0	9.42174066658815e-05	0	0	2.35543516664704e-05	2.35543516664704e-05	0	2.35543516664704e-05	0	2.35543516664704e-05	2.35543516664704e-05	0	0	0	0	2.35543516664704e-05	0	0	2.35543516664704e-05	4.71087033329408e-05	0	0	0	0	0	0	0	9.42174066658815e-05	0	0	4.71087033329408e-05	9.42174066658815e-05
Streptococcus_sobrinus	0	0	0	0	0	0	2.35543516664704e-05	0	0	0	0	0.000235543516664704	0	0	0	0	0	0	2.35543516664704e-05	0.00117771758332352	0	0	0	0	0	0	0	0	0	0	0	0	0	0	0	0	0	0	0	0	0	0	0	0	0	0	0	0	0
Olsenella_scatoligenes	0	0	0	0	0	0	0	0	0	0	0	0	2.35543516664704e-05	0	0	0	0	0	0	0	0	0	0	0	0	0	0	0	0	0	0	0	0	0	0	0	0	0	0	0	0	0	0	0	0	0	0	0	0
Ruminococcus_champanellensis_18P13_=_JCM_17042	0	0	0	0	0	0	0	0	0	0	0	0	0	0	0	0	0	0	0	0	0	0	0	0	0	0	0	0	0	0	0	0	0	0	0	0	0	0	0	0	0	0	0	0	0	0	0	0	0
Actinomyces_viscosus	0	0	0	0	0	0	0	0	0	2.35543516664704e-05	0	4.71087033329408e-05	2.35543516664704e-05	7.06630549994111e-05	7.06630549994111e-05	4.71087033329408e-05	0	0	0	0	0	0	0	0	0	0	0	2.35543516664704e-05	0	0.000211989164998233	2.35543516664704e-05	0	2.35543516664704e-05	0	0	0	0	2.35543516664704e-05	2.35543516664704e-05	2.35543516664704e-05	2.35543516664704e-05	0	0	0	2.35543516664704e-05	2.35543516664704e-05	7.06630549994111e-05	0.000117771758332352	7.06630549994111e-05
Parasutterella_excrementihominis	0	0.000141326109998822	0	0	0	0	9.42174066658815e-05	4.71087033329408e-05	0	0	0	0	4.71087033329408e-05	0	0	0	2.35543516664704e-05	0	0	0	0	0	7.06630549994111e-05	0	4.71087033329408e-05	0	0	7.06630549994111e-05	0	0	0	0	7.06630549994111e-05	0	0	0	0	0	0	0	0.000235543516664704	0	0	4.71087033329408e-05	0.000164880461665293	0	4.71087033329408e-05	0	0
unidentified_rumen_bacterium_JW32	0	0	0	0	0	0	0	0	0	0	0	0	0	0	0	0	0	0	0	0	0	0	0	0	0	0	0	0	0	0	0	0	0	0	0	0	0	0	0	0	0	0	0	0	0	0	0	0	0
Ruminococcus_sp._YE281	0	0	2.35543516664704e-05	0	0	0	0	0	0	0	0	0.0023083264633141	0	0	0	0	0	0	0	0	0	0	0	0	0	0	0	0	0	0	0	0	0	0	0	0	0	0	0	0	0	0	0	0	0	0	0	0	0
Lactobacillus_brevis	0	0	0	0	0	0	0	0	0	0	0	0	0	0	0	0	0	0	0	0	0	0	0	0	0	0	0	0	0	0	0	0	0	0	0	0	0	0	0	0	0	0	0	0	0.000141326109998822	0	0	0	0
uncultured_Leptotrichia_sp.	0	0	0.00162525026498646	0	0	2.35543516664704e-05	0	0	0.000117771758332352	0	0	0	0	0	0	0	0	0	0	0	4.71087033329408e-05	0	0	0	0	0	0	0	0	0	0	2.35543516664704e-05	0	0	0	0	0	0	0	0	0	0	0	0	0	0	0	0	0
Clostridium_saccharogumia	0.000117771758332352	0	0	0	0	0	0	0	0	0	0	4.71087033329408e-05	0	0	2.35543516664704e-05	0	0	0	0	0	0	0	0	0	0	0	0	0	0	0	0	0	0	0	0	0	0	0	0	2.35543516664704e-05	0	4.71087033329408e-05	0	0	0	0	0	0	0
Gardnerella_vaginalis	0	0	0	0	0	0	0	0	0	0	0.000306206571664115	4.71087033329408e-05	2.35543516664704e-05	0	7.06630549994111e-05	2.35543516664704e-05	0	0	0	0	2.35543516664704e-05	0.000188434813331763	0	0	0.000117771758332352	0	0	0	9.42174066658815e-05	2.35543516664704e-05	0	9.42174066658815e-05	0	7.06630549994111e-05	0.000188434813331763	7.06630549994111e-05	9.42174066658815e-05	0	0	7.06630549994111e-05	0	0	0	0	0	0	0	0	0
bacterium_enrichment_culture_clone_MS20	0	0	0	0	0	0	0	0	0	4.71087033329408e-05	0	0	0	0	0	0.00101283712165823	0	0	0	4.71087033329408e-05	0	0	0	0	0	0	0	0	0	0	0	0	0	0	0	0	0	0	0	0	0	0	0	7.06630549994111e-05	0	0	0	0	0
Ruminococcaceae_bacterium_GD6	0	0	0	0	0	0	2.35543516664704e-05	2.35543516664704e-05	0	0	0	2.35543516664704e-05	0	0	4.71087033329408e-05	0.000141326109998822	0	0	0	0	0	2.35543516664704e-05	0	0	0	9.42174066658815e-05	0	0	0	0	0	0	0	0	0	0	0	4.71087033329408e-05	4.71087033329408e-05	4.71087033329408e-05	0	0	0	0	0	0	0	0	0
Prevotella_corporis	0	4.71087033329408e-05	0	0	0	0	0	0	0	0	0	0	9.42174066658815e-05	0	0	0	0	0	0	0	0	0	0	0	2.35543516664704e-05	2.35543516664704e-05	0	0	0	0	0	0.000447532681662937	0	0	0	4.71087033329408e-05	0	0	0	0	9.42174066658815e-05	0	0	0	0	2.35543516664704e-05	0	0	0
Prevotella_buccae	0	0	0.000777293604993523	0	0	0	0	0	0	0	0	0	0	0	0	0	0	0	0	0	0	0	0	0	0	0	0	0	2.35543516664704e-05	0	0	0	2.35543516664704e-05	0	0	7.06630549994111e-05	0	0	0	0	0	0	0	0	0	0	0	0	4.71087033329408e-05
bacterium_ic1340	0	0	0	0	0	0	0	0	0	0	0	0	0	0.0006359674949947	0	0	0	0	0	0	0	0	0	0	0	0	0	0	0	0	0	0	0	0	0	0	0	0	0	0	0	0	0	0	0	0	0	0	0
bacterium_enrichment_culture_clone_KWE55-24	0	0	0	0	0	0	0	0	0	0	0	0	0	0	0	0	0	0	0	0	0	0	0	0	0	0	0	0	0	0	0	0	0	0	0	0	0	0	0	0	0	0	0	0	0	0	0	0	0
Intestinimonas_sp._FSAA-17	0	0	0	0	0	0	0	0	0	0	4.71087033329408e-05	2.35543516664704e-05	0	0	0	4.71087033329408e-05	0	0	0	0	0	0	4.71087033329408e-05	0	0	0	0	0	0	0	0	0	0	0	0	0	0	0	0	0	0	0	0	0	0	0	0	0	0
Bacteroides_fluxus	0	0	0	0	0	0	0	0	0	0	0	0	0	0	0	0	0	0	0	0	0	0	0	0	0	0	0	0	0	0	2.35543516664704e-05	0	0	0	0	0	9.42174066658815e-05	0	0	0	0	0	0	0	0	0	0	0	0
Prevotella_disiens	0	0	0	0	0	0	0	0	0	0	0	0	0	0	0	0	0	0	0	0	2.35543516664704e-05	0	0	0	0	2.35543516664704e-05	0	0	0	0	0	7.06630549994111e-05	0	0	0	0	0	0	0	0	0	0	0	0	0	0	0	0	4.71087033329408e-05
Eubacterium_limosum	0	0	0	0	0.000447532681662937	0	2.35543516664704e-05	0	0	0	0	0	0	0	0	2.35543516664704e-05	0	0	0	7.06630549994111e-05	0	0	0	0	0	0	0	0	0	2.35543516664704e-05	0	0	0	0	0	0	0	0	0	0	0	0	0	0	0	0	0	0	0
Dielma_fastidiosa	0	0	0	0	0	0	0	4.71087033329408e-05	0	2.35543516664704e-05	0	4.71087033329408e-05	0	0	0	0	0	0.000211989164998233	0	0.000259097868331174	0	0	0	0	0	0	0	0	0	0	0	4.71087033329408e-05	0	0	0	2.35543516664704e-05	2.35543516664704e-05	0	0.000164880461665293	0	0	0	2.35543516664704e-05	2.35543516664704e-05	9.42174066658815e-05	0	0	0	0
uncultured_Porphyromonadaceae_bacterium	2.35543516664704e-05	0	0	2.35543516664704e-05	9.42174066658815e-05	0	0	0	0	0	0	0	0	0	0	0	0	0	2.35543516664704e-05	4.71087033329408e-05	0	2.35543516664704e-05	7.06630549994111e-05	0	0	0	0	0	0	0	0	0	0	0	0	0	0	0	0	0	0	0	0	2.35543516664704e-05	0	0	0	0	0
bacterium_NLAE-zl-G417	0	0	0	0	0	0	0	0	0	0	0	0	0	0	0	0	0	0	0	0	0	0	7.06630549994111e-05	0	0	0	0	0.000188434813331763	0	0	0	0	0	0	0	0	0	0	0	0	0	0	0	0.000141326109998822	0	0	0	0	0
uncultured_Abiotrophia_sp.	0	4.71087033329408e-05	0	0	0	0	2.35543516664704e-05	0	0	0	0	4.71087033329408e-05	0	2.35543516664704e-05	0	0	0	0	2.35543516664704e-05	0	0	0	0	2.35543516664704e-05	4.71087033329408e-05	0	0	0	2.35543516664704e-05	0	0	2.35543516664704e-05	0	0	0	0	0	0	0	0	0	0	0	0	0	0	0	0	2.35543516664704e-05
Blautia_hydrogenotrophica	0	0.000141326109998822	0	0	0	0	0	0	0	0	0	0	0	0	0	2.35543516664704e-05	0	0	0	0	0	0	0	0	0	0	0	0	0	0	0	0	0	0	0	0	0	7.06630549994111e-05	0.000211989164998233	0	0	0	0	2.35543516664704e-05	0	0	0	0	2.35543516664704e-05
Lactobacillus_animalis	0	0	0	0	0	0	0	0	0	0	0	0	0	0	0	0	0	0	0	0	0	0	0	0	0	0	0	0	0	0	0	0	0	0	0	0	0	0	0	0	0	0	0	0	0	0	0	0	0
Bacillus_thuringiensis_serovar_kurstaki_str._YBT-1520	0	0	0	0	0	0	0	0	0	0	0	0	0	0	0	0	0	0	0	0	0	0	0	0	0	0	0	0	0	0	0	0	2.35543516664704e-05	0	0	0	0	0	0	0	0	0	0	0	0	0	0	0	0
Fusobacterium_equinum	0	0	0	0	0	0	0	0	0	0	0	0	0	0	0	0	0	0	0	0	0	0	0	0	0	0	0	0	0	0	0	0	0	0	0	0	0	0	0	0	0	0	0	0	0	0	0	0	0
uncultured_compost_bacterium	0	0	0	0	0	0	0	0	0	0	0	0	0	0	0	0	0	0	0	0	0	0	0	0	0	0	0	0	0	0	0	0	0	0	0	0	0	0	0	0	0	0	0	0	0	0	0	0	0
Campylobacter_showae	0	0	0.000942174066658815	0	0	0	0	0	2.35543516664704e-05	0	0	0	0	0	0	0	0	2.35543516664704e-05	0	0	0	2.35543516664704e-05	0	0	0	0	0	0	2.35543516664704e-05	0	0	0	0	0	0	0	0	0	0	0	0	0	0	0	0	0	0	0	0
Lactococcus_raffinolactis	0	4.71087033329408e-05	0	0	0	0	0	0	0	0	0	9.42174066658815e-05	0	2.35543516664704e-05	0	0	0	0	0	0	0	0	0	0	7.06630549994111e-05	0	0	4.71087033329408e-05	0	0	0	0	0	0	0	0	9.42174066658815e-05	2.35543516664704e-05	2.35543516664704e-05	0	0	0	0	0	0	0	0	0	0
Atopobium_vaginae	0	0	0	0	0	0	0	0	0	0	0	0	0	0.000141326109998822	0.000117771758332352	0	0	0	0	0.000282652219997645	0.000117771758332352	0	0	2.35543516664704e-05	0	0	0	0	0	2.35543516664704e-05	0	4.71087033329408e-05	0	2.35543516664704e-05	7.06630549994111e-05	9.42174066658815e-05	0	0	0	0	0	0	0	0	0	0	0	0	0
uncultured_Thermoanaerobacterales_bacterium	0	0	0	0	0	0	0	0	0	0	0	0	0	0	0	0	0	0	0	2.35543516664704e-05	0	0	0	0	0	0	0	0	0	0	0	4.71087033329408e-05	0	0	0	0	0	0	0	0	0	0	0	0	0	0	0	0	0
Prevotella_timonensis	0	0	0	0	0	0	0	0	0	0	0	0	4.71087033329408e-05	0	7.06630549994111e-05	0	4.71087033329408e-05	0	0	0	0	0	0	2.35543516664704e-05	0	2.35543516664704e-05	0	0	0	2.35543516664704e-05	0	0	0	7.06630549994111e-05	0	9.42174066658815e-05	0	0	0	0	0	0	0	0	0	0	0	0	0
Alistipes_finegoldii_DSM_17242	0	0	0	0	0	0	0	0	0	0	0	0	0	0	0	2.35543516664704e-05	0	0	0	4.71087033329408e-05	0	0	0	0	0	0	0	0	0	0	0	0	0	0	0	0	0	2.35543516664704e-05	0	0	0	0	0	0	0	0	0	0	0
Lactobacillus_sp._AB032	0	0	0	0	0	0	0	0	0	0	0	0	0	0	0	0	0	0	0	0	0	0	0	0	0	0	0	0	0	0	0	0	0	0	0	0	0	0	0	0	0	0	0	0	0	0	0	0	0
bacterium_mpn-isolate_group_3	0	0	0	0	0	0	0	0	0.000164880461665293	0	0	0	0	0	0	0	0	0	0	0	0	0	0	0	0	0	0	0	0	0	0	0	0	0	0	0	0	0	0	0	0	0	0	0	0	0	0	0	0
Dialister_propionicifaciens	0	0	0	0	0	0	0	0	0	0	0	0	2.35543516664704e-05	0	0	2.35543516664704e-05	0	0	0	0	0	0	0	0	0	0	0	0	0	0	0	2.35543516664704e-05	0	0	0	0	0	0	0	0	0	0	0	0	2.35543516664704e-05	0	0	0	0
Corynebacterium_sp._oral_taxon_B00	0	0	4.71087033329408e-05	0	0	0	0	0	2.35543516664704e-05	4.71087033329408e-05	0	0	0	0	4.71087033329408e-05	7.06630549994111e-05	4.71087033329408e-05	7.06630549994111e-05	0	0	4.71087033329408e-05	2.35543516664704e-05	0	2.35543516664704e-05	0	0	0	0	0	2.35543516664704e-05	7.06630549994111e-05	2.35543516664704e-05	2.35543516664704e-05	9.42174066658815e-05	0	0	0	0	0	0	0	0	0	0	0	0	0	0	0
uncultured_proteobacterium	0	0	0	0	2.35543516664704e-05	0	0	0	0	0	0	0	0	0	0	0	0	0	0	0	0	0	0	0	0	0	0	0	0	0	0	0	0	0	0	0	0	0	0	0	0	2.35543516664704e-05	0	0	0	0	0	0	0
Ruminococcus_sp._RLB1	0	0	0	0	0	0	0	0	0	0	0	0	0	0	0	0	0	0	0	0	0	0	0	0	0	0	0	0	0	0	0	0	0	0	2.35543516664704e-05	0	0	2.35543516664704e-05	0	0	0	0	0	0	0	0	0	0	0
Clostridium_sp._AT5	0	0	0	0	0	0.000141326109998822	0	0	0	0	0	0	0	0	0	0	2.35543516664704e-05	0	0	0	0	0	0	0	0	0	4.71087033329408e-05	0	0	0	0	0	0	0	0	0	0	0	2.35543516664704e-05	0	0	0	0	0	0	0	0	0	0
Porphyromonas_asaccharolytica	0	0	0	0	0	0	0	0	0	0	0	0	0	0	0	0	0	0	0	0	4.71087033329408e-05	0	0	0	0	0	0	0	0	0	0	0	0	0	0	0.000141326109998822	0	0	0	0	0	0	0	0	0	0	0	0	0
Desulfovibrio_desulfuricans	4.71087033329408e-05	0	0	0	0	0	0	0	0	0	0	0	0	2.35543516664704e-05	0	0.000353315274997056	0	0	0	0	0	0	0	0	0	0	0	0	0	0	0	0	0	0	0	0	0	0	0	0	0	0	2.35543516664704e-05	0	0	0	0	0	0
uncultured_Fusobacterium_sp.	0	0	0	0	0	2.35543516664704e-05	0	0	0	0	0	0	0	0	0	0	2.35543516664704e-05	0	0	0	0	0	0	0	0	0	0	0	0	0	0	0	0	0	0	0	2.35543516664704e-05	0	0	0	0	0	0	0	2.35543516664704e-05	0	0	0	0
uncultured_bacterium_AH040	0	0	7.06630549994111e-05	0	0	0	0	0	2.35543516664704e-05	0	0	0	0	0	2.35543516664704e-05	0	2.35543516664704e-05	0	0	0	0	4.71087033329408e-05	0	0	0	7.06630549994111e-05	0	2.35543516664704e-05	0	0	0	0	0	0	0	0	0	0	0	0	0	0	0	0	0	0	0	2.35543516664704e-05	0
Faecalitalea_cylindroides	0	0	0	0	0	0	0	0	0	0	0.000164880461665293	0	0	0	0	0	0	0	0	0	0	0	0	0	0	0	0	0	0	0	0	0	0	0	0	0	0	0	0	0	0	0	0	0.000259097868331174	0	0	0	0	0
uncultured_Cytophaga_sp.	2.35543516664704e-05	0	2.35543516664704e-05	0	0	2.35543516664704e-05	0	0	2.35543516664704e-05	0	0	0	0	0	0	0	0	0	0	0	0	4.71087033329408e-05	0	0	9.42174066658815e-05	4.71087033329408e-05	0	0	0	0	0	7.06630549994111e-05	0	7.06630549994111e-05	0	0	0	0	0	0	0	0	0	0	0	0	0	0	0
Christensenella_minuta	0	0	0	0	4.71087033329408e-05	0	0	0	0	0	0	0	0	0	0	2.35543516664704e-05	0	0	0	0	0	0	0	0	0	0	0	0	0	0	0	0	0	0	0	0	0	0	0	0	0	0	0	9.42174066658815e-05	0	0	0	0	0
Slackia_piriformis	0	0	0	0	0	0	0	0	0	0	0	0	0	0	0	0	0	0	0	0.000282652219997645	0	0	0	0	0	0	0	0	0	0	0	0	0	0	0	0	0	0	0	0	0	0	0	0	0	0	0	0	0
unidentified_rumen_bacterium_RFN74	0	0	0	0	0	0	0	0	0	0	0	0	0	0	0	0	0	0	0	0	0	0	0	0	0	0	0	0	0	0	0	0	0	0	0	0	0	0	0	0	0	0	0	0	0	0	0	0	0
uncultured_eukaryote	2.35543516664704e-05	0	0	0	0	0	0	0	0	0	0	0	0	0	0	0	0	0	0	0	0	0	0	4.71087033329408e-05	0	0	0	0	0	0	0	0	0	0	0	0	0	0	0	0	0	0	0	4.71087033329408e-05	0	0	0	0	0
unidentified_rumen_bacterium_RF9	0	0	0	0	0	0	0	0	0	0	0	0	0	0	0	0	0	0	0	0	0	0	0	0	0	0	0	0	0	0	0	0	0	0	0	0	0	0	0	0	0	0	0	0	0	0	0	0	0
Clostridium_cocleatum	0	0	0	0	0	0	0	0	0	0	0	0	0	0	0	0	0	0	0	0	0	0	0	0	0	0	0	0	0	0	0	0	0	0	0	0	0	0	0	0	0	0	0	0	0	0	0	0	0
Butyricimonas_synergistica	0	0	0	0	0	0	0	0	0	0	0	0	0	0	0	0	0	0	0	0	0	0	0	0	0	0	0	0	0	0	0	0	0	0	0	0	0	0	0	0	0	0	0	0	0	0	0	0	0
Prevotella_aurantiaca	0	0	0.00061241314332823	0	0	0	0	0	0	0	0	0	0	0	0	0	0	0	0	0	0	0	0	0	0	0	0	0	0	0	0	0	0	0	0	0	0	0	0	0	0	0	0	0	0	0	0	0	0
Neisseria_perflava	0	0	0.000117771758332352	0	0	0	0	0	0	0	0	0	0	0	0	0	0	0	0	0	0	0	0	7.06630549994111e-05	0	0	0	0	0	0	0	0	0	0	0	2.35543516664704e-05	2.35543516664704e-05	0	0	0	0	0	0	0	0	0	0	0	0
Oscillospiraceae_bacterium_AIP_1035.11	0	0	0	4.71087033329408e-05	0	0	0	0	0	2.35543516664704e-05	0	0	0	0	0	0	0	0	0	0	0	0	0	0	0	0	0	0	0	0	0	0	0	0	0	0	0	0	0	0	0	0	0	0	0	0	0	0	0
Leptotrichia_amnionii	0	0	0	0	0	0	0	0	0	0	0	0	4.71087033329408e-05	0	7.06630549994111e-05	0	0	0	0	0	0	0	0	9.42174066658815e-05	0	9.42174066658815e-05	0	0	0	7.06630549994111e-05	0	9.42174066658815e-05	0	0	0	0	0	0	0	0	0	0	0	0	0	0	0	0	0
Veillonella_magna	0	0	0	0	0	0	0	0	0	0	0	0	0	0.000565304439995289	0	0	0	0	0	0	0	0	0	0	0	0	0	0	0	0	0	0	0	0	0	0	0	0	0	0	0	0	0	0	0	0	0	0	0
uncultured_Bacteroidales_bacterium	0	0	0	0	0	0	0	0	0	0	0	0	0	0	0	0	0	0	0	0	0	0	0	0	0	0	0	0	0	0	0	4.71087033329408e-05	0	0	0	0	0	0	0	0	0	0	0	0	0	0	0	0	0
Capnocytophaga_sputigena	4.71087033329408e-05	2.35543516664704e-05	0	0	0	0	0	0	0	0	0	0	0	0	2.35543516664704e-05	0	0	0	2.35543516664704e-05	7.06630549994111e-05	2.35543516664704e-05	0	0	2.35543516664704e-05	0	2.35543516664704e-05	0	0	0	0	0	0	0	0	0	0	0	0	0	0	0	0	0	0	0	0	0	0	0
Streptococcus_agalactiae	0	0	0	0	0	0	0	0	0	0	0	0	2.35543516664704e-05	0	0	9.42174066658815e-05	0	0	0	0	0	0	0	0	0	0	0	0	0	0	0	0	0	0	0	0	0	0	0	0	0	0	0	0	0	0	0	0	0
uncultured_bacterium_A19	0	0	0	0	0	0	0	0	0	4.71087033329408e-05	0	0	0	0	0	0	0	0	0	0	0	0	0	0	0	0	0	0	0	0	0	0	0	2.35543516664704e-05	0	0	0	0	0	0	0	2.35543516664704e-05	0	2.35543516664704e-05	0	0	0	0	0
Clostridium_sp._YIT_12070	0	0	0	0	2.35543516664704e-05	0	0	0	0	0	0	0	0	0	0	7.06630549994111e-05	0	0	0	0	0	0	0	0	0	0	0	0	0	0	0	2.35543516664704e-05	0	0	0	0	0	0	0	0	0	0	0	0	0	0	0	0	0
Leptotrichia_sp._oral_clone_FP036	0	0	0	0	0	0	0	0	0	0	0	0	0	0	0	0	0	0	0	0	0	0	0	0	0	0	0	0	0	0	0	0	0	0	0	0	0	0	0	0	0	0	0	0	0	0.000211989164998233	0	0	0
bacterium_P1C10	0	0	0	0	0	0	0	0	0	0	0	0	0	0	0	0	0	0	0	9.42174066658815e-05	0	0	0	0	0	0	0	0	0	0	0	0	0	0	0	0	0	0	0	0	0	0	0	0	0	0	0	0	0
Porphyromonas_bennonis	0	0	0	0	0	0	0	0	0	0	0	0	0	0	0	0	0	0	0	0	0	0	0	0	0	0	0	0	0	0	0	0	0	0	0	0	0	0	0	0	0	0	0	0	0	0	0	0	0
Prevotella_nigrescens	0	0	0.000353315274997056	0	0	0	0	0	0	0	0	0	0	0	0	0	0	0	0	0	0	2.35543516664704e-05	0	0	0	0	0	0	0	0	0	0	0	0	0	0	0	0	0	0	0	0	0	0	0	0	0	0	0
uncultured_Alkalibacter_sp.	0	0	0	0	2.35543516664704e-05	0	0	0	0	0	0	0	0	0	0	2.35543516664704e-05	0	0	0	2.35543516664704e-05	0	0	2.35543516664704e-05	0	0	0	0	2.35543516664704e-05	0	0	0	0	0	2.35543516664704e-05	0	0	0	0	0	0	0	0	0	2.35543516664704e-05	0	0	0	0	0
Selenomonas_sp._FOBRC9	0	0	0	0	0	0	0	0	0	0	0	0	0	0	0	0	0	0	2.35543516664704e-05	0	0	0	0	0	0	0	0	0	0	0	0	0	0	0	0	0	0	0	0	0	0	0	0	0	0	0	0	0	0
Corynebacterium_argentoratense_DSM_44202	2.35543516664704e-05	0	0	0	0	0	0	0	0	0	0	0	0	0	0	0	0	0	2.35543516664704e-05	0	0	0	0	0	0	0	0	0	0	0	0	0	0	0	0	0	0	0	0	0	0	0	0	0	0	0	0	0	0
uncultured_bacterium_adhufec279	0	0	0	0	0	0	0	0	0	0	0	0	0	0	0	0	0	0	0	0	0	0	0	0	0	0	0	0	0	0	0	0	0	0	0	0	0	0	0	0	0	0	0	0	0	0	0	0	0
Prevotella_intermedia	0	0	0.000376869626663526	2.35543516664704e-05	0	0	0	0	0	0	0	0	0	0	0	0	0	0	0	0	0	0	0	0	0	0	0	0	0	0	0	0	0	0	0	0	0	0	0	0	0	0	0	0	0	0	0	0	0
Anaerococcus_tetradius	0	0	0	0	0	0	0	0	0	0	0	0	0	0	0	0	2.35543516664704e-05	0	0	0	0	0	0	0	0	0	0	0	0	0	0	0	0	0	0	0	0	0	0	0	0	0	0	0	0	0	0	0	0
butyrate-producing_bacterium_L2-7	0	0	0	0	0	0	0	0	0	0	0	0	0	0	0	0	0	0	2.35543516664704e-05	0	0	0	2.35543516664704e-05	4.71087033329408e-05	0	0	0	0	0	0	0	0	0	0	0	0	0	0	0	0	0	0	0	0	2.35543516664704e-05	0	0	0	0
uncultured_Mogibacterium_sp.	0	0	2.35543516664704e-05	0	0	0	0	0	0	0	0	0	0	0	0	0	0	0	0	0	0	0	0	0	0	0	0	0	0	0	0	0	0	0	0	0	0	0	4.71087033329408e-05	0	0	0	0	0	2.35543516664704e-05	4.71087033329408e-05	0	0	2.35543516664704e-05
Blautia_sp._canine_oral_taxon_143	0	0	0	0	0	0	0	0	0	0	2.35543516664704e-05	0	0	0	0	0	0	0	4.71087033329408e-05	0	0	0	0	0	0	0	2.35543516664704e-05	0	0	0	0	0	0	0	0	0	2.35543516664704e-05	0	0	0	2.35543516664704e-05	0	0	0	2.35543516664704e-05	0	0	0	0
Scardovia_inopinata_JCM_12537	0	0	0	0	0	0	0	0	0	0	0	0	0	0	0	0	0	0	0	0	0	0	0	0	0	0	0	0	0	0	0	0	0	0	0	0	0	0	0	0	0	0	0	0	0	0	0	0	0
Pseudomonas_fragi	0	0	0	0	0	0	0	0	0	0	0	0	4.71087033329408e-05	0	0	0	0	0	0	0	0	0	0	0	0	0	0	0	0	0	0	0	0	0	0	0	0	2.35543516664704e-05	0	0	0	0	0	0	0	0	0	2.35543516664704e-05	0
Bacillus_subtilis_KCTC_1028	0	0	0	0	0	0	0	0	0	0	0	0	0	0	0	0	0	0	0	0	0	0	0	0	0	0	0	0	0	0	0	0	0	0	0	0	0	0	0	0	0	0	0	0	0	0	0	0	0
uncultured_Dehalobacterium_sp.	0	0	0	0	0	0	0	0	0	2.35543516664704e-05	0	0	0	0	0	0	0	0	0	0	0	0	2.35543516664704e-05	0	0	0	0	2.35543516664704e-05	0	0	2.35543516664704e-05	0	0	0	0	0	0	0	0	0	0	0	0	0	0	0	0	0	0
Enorma_massiliensis_phI	0	0	0	0	0	0	0	0	0	0	0	2.35543516664704e-05	0	0	0	0	0	0	0	0	0	0	0	0	0	0	0	0	0	0	0	0	0	0	0	0	0	0	0	0	0	0	0	0.000141326109998822	0	0	0	0	0
Peptoniphilus_coxii	0	0	0	0	0	0	0	0	0	0	0	0	0	0	0	0	0	0	0	0	0	0	0	0	0	0	0	0	0	0	0	0	0	0	0	0	0	0	0	0	0	0	0	0	0	0	9.42174066658815e-05	0	0
Clostridiales_bacterium_10-3b	0	0	0	0	0	0	0	0	0	0	0	0	0	0	0	0	0	0	0	2.35543516664704e-05	0	0.000164880461665293	0	0	0	0	0	0	0	0	0	0	0	0	0	0	0	0	0	0	0	0	0	0	0	0	0	0	0
Acinetobacter_johnsonii	0	0	0	0	0	0	0	0	0	0	0	0	0	0	0	0	0	0	0	0	0	0	0	0	0	0	0	0	0	0	0	0	0	0	0	0	0	0	0	0	0	0	0	0	0.000235543516664704	0	0	0	0
Bacteroides_sp.	7.06630549994111e-05	0	0	0	0	0	2.35543516664704e-05	0	0	0	0	0	0	0	0	4.71087033329408e-05	0	0	0	0	0	0	2.35543516664704e-05	0	0	0	0	0	0	0	0	0	0	0	0	0	0	0	0	0	0	0	0	0	0	0	0	0	0
Agarivorans_gilvus	0	0	0	0	0	0	0	0	0	0	0	0	0	0	0	0	0	0	0	0	0	0	0	0	0	0	0	0	0	0	0	0	0	0	0	0	0	0	0	0	0	0	0	0	0	0	0	0	0
uncultured_Selenomonas_sp.	0	0	0	0	0	0	0	0	0	0	0	0	0	0	0	0	0	0	0	0	0	0	0	0	0	0	2.35543516664704e-05	0	0	0	0	0	2.35543516664704e-05	0	0	0	0	0	0	0	0	0	0	0	0	0	0	0	0
uncultured_bacterium_adhufec73	0	0	0	0	0	0	0	0	0	0	0	0	0	0	0	0	0	0	0	0	0	0	0	0	0	0	0	0	0	0	0	0	0	0	0	0	0	0	0	0	0	0	0	0	0	0	0	0	0
Scardovia_wiggsiae	0	0	0	0	0	0	0	0	0	0	0	0	0	0	0	0	0	2.35543516664704e-05	0	2.35543516664704e-05	0	0	0	0	0	0	0	0	0	0	0	0	0	0	0	0	0	0	0	0	0	0	0	0	0	0	0	0	0
Prevotella_amnii	0	0	0	0	0	0	0	0	0	0	0	0	7.06630549994111e-05	0	0	0	0	0	0	0	7.06630549994111e-05	0	0	7.06630549994111e-05	0	7.06630549994111e-05	0	0	0	0	0	2.35543516664704e-05	0	0	0	0	0	0	0	0	0	0	0	0	0	0	0	0	0
Bacteroides_sp._DSM_12148	0	0	0	0	0	0	0	0	0	0	0	0	0	0	0	0	0	0	0	0	0	0	0	0	0	0	0	0	0	0	0	0	0	2.35543516664704e-05	0	0	0	2.35543516664704e-05	0	0	0	0	0	0	0	0	0	0	0
Eubacterium_brachy	0	2.35543516664704e-05	0	0	0	0	0	0	0	0	0	0	0	0	0	0	0	0	0	0	0	0	0	0	0	0	0	0	0	0	0	0	0	0	0	0	0	0	0	0	0	0	0	0	0	9.42174066658815e-05	0	0	0
Peptoniphilus_lacrimalis	0	0	0	0	0	0	0	0	0	0	0	0	2.35543516664704e-05	0	0	0	0	0	0	0	0	0	0	0	0	0	0	0	0	2.35543516664704e-05	0	0	0	0	0	2.35543516664704e-05	0	0	0	0	0	0	0	0	0	0	0	0	0
Neisseria_oralis	0	0	0.000188434813331763	0	0	0	0	0	0	0	0	0	0	0	0	0	0	0	0	0	0	2.35543516664704e-05	0	0	0	0	0	0	0	0	0	0	0	0	0	0	0	0	0	0	0	0	0	0	0	0	0	0	0
Clostridiales_bacterium_oral_clone_MCE3_9	0	0	0	0	0	0	0	0	0	0	0	0	0	0	0	0	0	0	0	0	0	0	0	0	0	0	0	0	0	0	0	0	0	0	0	0	0	0	0	0	0	0	0	0	0	0	0	0	0
Gemella_asaccharolytica	0	0	0	0	0	0	0	0	0	0	0	0	0	2.35543516664704e-05	0	0	2.35543516664704e-05	0	0	0	0	0	0	0	0	2.35543516664704e-05	0	0	0	0	0	0	0	0	0	0	0	0	0	0	0	0	0	0	0	0	0	0	0
Campylobacter_ureolyticus	0	0	0	0	0	0	0	0	0	0	0	0	2.35543516664704e-05	0	0	0	0	0	0	0	0	0	0	0	2.35543516664704e-05	0	0	0	0	0	0	0	0	0	0	0	0	0	0	0	0	0	0	0	0	0	0	0	0
Clostridium_sp._ASF502	0	0	0	0	0	0	0	0	0	0	0	0	0	0	0	0	0	0	0	0	0	0	0	0	0	0	0	0	0	0	0	0	0	0	0	0	0	0	0	0	0	0	0	0	0	0	0	0	0
uncultured_microorganism	2.35543516664704e-05	0	0	0	2.35543516664704e-05	0	0	0	0	0	0	0	0	0	0	4.71087033329408e-05	0	0	0	0	0	0	0	0	0	0	0	0	0	0	0	0	0	0	0	2.35543516664704e-05	0	0	0	0	0	0	0	0	0	0	0	0	0
Eubacterium_saphenum	2.35543516664704e-05	0	0	0	0	0	0	0	0	0	0	0	0	0	0	0	0	0	0	0	0	0	0	0	0	0	0	0	0	0	0	0	0	0	0	0	0	0	0	0	0	2.35543516664704e-05	0	0	0	7.06630549994111e-05	0	0	0
Prevotellaceae_bacterium_DNF00733	0	0	0	0	0	0	0	0	0	0	0	0	0	0	0	0	0	0	0	0	2.35543516664704e-05	0	0	0	0	0	0	0	0	4.71087033329408e-05	0	0	0	2.35543516664704e-05	0	0	0	0	0	0	0	0	0	0	0	0	0	0	0
Clostridiales_bacterium_KA00274	0	0	0	0	0	0	0	0	0	0	0	0	0	0	0	0	0	0	0	0	0	0	0	0	0	0	0	0	0	4.71087033329408e-05	2.35543516664704e-05	0	0	2.35543516664704e-05	0	9.42174066658815e-05	0	0	0	0	0	0	0	0	0	0	0	0	0
Clostridium_sp._NML_04A032	0	0	0	0	0	0	0	0	0	0	0	0	0	0	0	0	0	0	0	0	0	0	0	0	0	0	0	0	0	0	0	0	0	0	0	0	0	0	0	0	0	0	0	0	0	0	0	0	0
Clostridium_neonatale	0	0	0	0	0	0	0	0	0	0	0	0	0	0	0	0	0	0	0	0	0	0	0	0	0	0	0	0	0	0	0	0	0	0	0	0	0	0	0	0	0	0	0	0	0	0	0	0	0
intestinal_bacterium_CG19-1	0	0	0	0	4.71087033329408e-05	0	0	0	0	0	0	0	0	0	0	0	0	0	0	0	0	0	0	0	0	0	0	0	0	0	0	0	0	0	0	0	0	0	0	0	0	0	0	7.06630549994111e-05	0	0	0	0	0
uncultured_bacterium_adhufec382	0	0	0	0	0	0	0	0	0	0	0	0	0	0	0	0	0	0	0	0	0	0	0	0	4.71087033329408e-05	0	0	0	0	0	0	0	0	0	0	0	0	0	0	0	0	7.06630549994111e-05	0	0	0	0	0	0	0
Eubacterium_sp._oral_clone_EI074	2.35543516664704e-05	2.35543516664704e-05	0	0	0	0	0	0	0	0	0	0	0	0	0	0	0	0	0	0	0	0	0	0	0	0	0	0	0	0	0	0	0	0	0	0	0	0	0	0	0	0	0	0	0	0	0	0	0
Lactobacillus_jensenii_JV-V16	0	0	0	0	0	0	0	0	0	0	0	0	0	0	0	0	0	7.06630549994111e-05	0	0	0	0	0	0	0	0	0	0	0	0	0	2.35543516664704e-05	0	0	0	0	0	4.71087033329408e-05	0	4.71087033329408e-05	0	0	0	0	0	0	0	0	0
Porphyromonadaceae_bacterium_C941	0	0	0	0	0	0	0	0	0	0	0	0	0	0	0	0	0	0	0	0	0	0	0	0	0	0	0	0	0	0	0	2.35543516664704e-05	0	0	0	0	0	0	0	0	4.71087033329408e-05	0	0	0	0	0	0	0	0
TM7_phylum_sp._oral_clone_CW040	0	0	0	0	0	0	0	0	0	0	0	0	0	0	0	0	0	0	0	0	0	0	0	0	0	0	2.35543516664704e-05	0	0	0	0	0	0	0	0	0	0	0	0	0	0	0	0	0	0	0	0	0	0
Phascolarctobacterium_faecium	0	0	0	0	0	0	0	0	0	0	0	0	0	0	0	2.35543516664704e-05	0	0	0	0	0	0	0	0	0	0	0	0	0	0	0	0	0	0	0	0	0	0	0	0	0	0	0	0	0	0	0	0	0
uncultured_actinobacterium	0	0	0	0	0	0	0	0	0	0	0	0	0	0	0	0	0	0	0	0	0	0	0	0	0	0	0	0	0	0	0	0	0	0	0	0	0	0	0	0	0	0	2.35543516664704e-05	0	0	0	0	0	0
Prevotella_pallens	0	0	0	0	0	0	0	0	0	0	0	0	0	0	0	0	0	0	0	2.35543516664704e-05	0	0	0	0	0	0	0	0	0	0	0	0	0	0	0	0	0	0	0	0	0	0	0	0	0	0	0	0	0
Lactobacillus_guizhouensis	0	0	0	0	0	0	0	0	0	0	0	0	0	0	0	0	0	0	0	0	0	0	0	0	0	0	0	0	0	0	0	0	0	0	0	0	0	0	0	0	0	0	0	0	0	0	0	0	0
Paenibacillus_taiwanensis	0	0	0	0	0	0	0	0	0	0	0	0	0	0	0	0	0	0.000211989164998233	0	0	0	0	0	0	0	0	0	0	0	0	0	0	0	0	0	0	0	0	0	0	0	0	0	0	0	0	0	0	0
Anaerofustis_stercorihominis	0	0	0	0	0	0	0	0	0	0	0	0	0	0	0	9.42174066658815e-05	0	0	0	0	0	0	0	0	0	0	0	2.35543516664704e-05	0	0	0	0	0	0	0	0	0	0	0	0	0	0	0	0	0	0	0	0	0
Corynebacterium_variabile_DSM_44702	0	0	0	0	0	0	0	0	0	0	0	0	0	0	0	0	0	0	0	0	0	0	0	0	0	0	0	0	0	0	0	0	0	0	0	0	0	4.71087033329408e-05	0	0	0	0	0	0	0	0	0	0	0
Porphyromonas_somerae	0	0	0	0	0	0	0	0	0	0	0	0	0	0	0	0	0	0	0	0	0	0	0	0	0	0	0	0	0	0	0	0	0	0	0	0	0	0	0	0	0	0	0	0	0	0	0	0	0
Streptococcus_parauberis	0	0	0	0	0	0	0	0	0	0	0	0	0	0.000117771758332352	0	0	0	0	0	0	0	0	0	0	0	0	0	0	0	0	0	0	0	0	0	0	0	0	0	0	0	0	0	0	0	0	0	0	0
bacterium_enrichment_culture_clone_DPHB07	0	0	0	0	0	0	0	0	0	0	0	0	0	0	0	0	0	0	0	7.06630549994111e-05	0	0	0	0	0	0	0	0	0	0	0	0	0	0	0	0	0	0	0	0	0	0	0	0	0	0	0	0	0
Parascardovia_denticolens_DSM_10105_=_JCM_12538	0	0	0	0	0	0	0	0	0	0	0	0	0	0	0	0	0	0	0	0	0	0	0	0	0	0	0	0	0	0	0	0	0	0	0	0	0	0	0	0	0	0	0	0	0	0	0	2.35543516664704e-05	0
Paraeggerthella_hongkongensis	0	0	0	0	0	0	0	0	0	0	0	0	0	0	0	0	0	0	0	0	0	0	0	0	0	0	0	0	0	0	0	0	0	0	0	0	0	0	0	0	0	0	0	0	0	0	0	2.35543516664704e-05	0
Vibrio_mediterranei	0	0	0	0	0	0	0	0	0	0	0	0	0	0	0	0	0	0	0	0	0	0	0	0	0	0	0	0	0	0	0	0	0	0	0	0	0	0	0	0	0	0	0	0.000188434813331763	0	0	0	0	0
TM7_phylum_sp._oral_taxon_437	0	0	0	0	0	0	0	0	0	0	0	0	0	0	0	0	0	0	0	0	0	0	0	0	0	0	0	0	0	0	0	0	0	0	0	0	0	0	0	0	0	0	0	0	0	0	0	0	0
uncultured_Mollicutes_bacterium	0	0	0	0	0	0	0	0	0	0	0	0	0	0	0	0	0	0	0	0	0	0	0	0	0	0	0	0	0	0	0	0	0	0	0	0	0	7.06630549994111e-05	0	0	0	0	0	9.42174066658815e-05	0	0	0	0	0
Peptoniphilus_sp._gpac148	0	0	0	0	0	0	0	0	0	0	0	0	0	0	0	0	0	0	0	0	0	0	0	0	0	0	0	0	2.35543516664704e-05	0	0	0	0	0	0	0	0	0	0	0	0	0	0	0	0	0	0	0	0
Pseudomonas_aeruginosa_PAO1	0	0	0	0	0	0	0	0	0	0	0	0	0	0	0	0	4.71087033329408e-05	0	0	0	0	0	0	0	2.35543516664704e-05	0	0	0	0	2.35543516664704e-05	0	0	0	0	0	0	0	0	0	0	0	0	0	0	0	0	0	0	0
Parabacteroides_chinchillae	0	0	0	0	0	0	0	0	0	0	0	0	0	0	0	0	2.35543516664704e-05	0	0	0	0	0	0	0	0	0	0	0	0	0	0	0	0	0	0	0	0	0	0	0	0	0	0	0	0	0	0	0	0
Acinetobacter_soli	0	0	0	0	0	0	0	0	0	0	0	0	0	0	0	0	0	0	0	0	0	0	0	0	0	0	0	0	0	0	0	0	0	0	0	0	0	0	0	0	0	0	0	0	0.000141326109998822	0	0	0	0
Actinomyces_sp._oral_clone_IP081	0	0	0	0	0	0	0	0	0	0	0	0	0	0	0	0	0	0	0	0	0	0	0	0	0	0	0	0	0	0	0	0	0	0	0	0	0	0	0	0	0	0	0	0	0	0	0	0	0
uncultured_bacterium_adhufec295	0	0	0	0	0	0	0	0	0	0	0	0	0	0	0	0	0	0	0	0	0	0	0	0	0	0	0	0	0	0	0	0	0	0	0	0	0	0	0	0	0	0	0	0	0	0	0	0	0
bacterium_RFB_D08	0	0	0	0	0	0	0	0	0	0	0	0	0	0	0	0	0	0	0	0	0	0	0	0	0	0	0	0	0	0	0	0	0	0	0	0	0	0	0	0	0	0	0	0	0	0	0	0	0
Prevotella_veroralis	0	0	9.42174066658815e-05	0	0	0	0	0	0	0	0	0	0	0	0	0	0	0	0	0	0	0	0	0	0	0	0	0	0	0	0	0	0	0	0	0	0	0	0	0	0	0	0	0	0	0	0	0	0
bacterium_enrichment_culture_clone_BBMC-9	0	0	0	0	0	0	0	0	0	0	0	0	0	0	0	0	0	0	0	0	0	0	0	0	0	0	0	0	0	0	0	0	0	0	0	0	0	0	0	0	0	0	0	0	0	0	0	0	0
Veillonellaceae_bacterium_KA00182	0	0	0	0	0	0	0	0	0	0	0	0	0	0	2.35543516664704e-05	0	0	0	0	0	4.71087033329408e-05	0	0	0	0	2.35543516664704e-05	0	0	0	0	0	0	0	0	0	0	0	0	0	0	0	0	0	0	0	0	0	0	0
Mycoplasma_hominis	0	0	0	0	0	0	0	0	0	0	0	0	2.35543516664704e-05	0	0	0	2.35543516664704e-05	0	0	0	0	0	0	0	0	0	0	0	0	0	0	0	0	0	0	0	0	0	0	0	0	0	0	0	0	0	0	0	0
Selenomonas_infelix	0	0	2.35543516664704e-05	0	0	0	0	0	0	0	0	0	0	0	0	0	0	0	0	0	0	0	0	0	0	0	0	0	0	0	0	0	0	0	0	0	0	0	0	0	0	0	0	0	0	0	0	0	0
Corynebacterium_tuberculostearicum	0	0	0	0	0	0	0	0	0	0	0	0	0	0	0	0	0	0	0	0	0	0	0	0	0	0	0	0	0	0	0	0	0	0	0	0	0	0	0	0	0	0	0	0	0	0	0	0	0
Coriobacteriales_bacterium_DNF00809	0	0	0	0	0	0	0	0	0	0	0	0	0	0	2.35543516664704e-05	0	2.35543516664704e-05	0	0	0	0	0	0	0	0	0	0	0	0	0	2.35543516664704e-05	2.35543516664704e-05	0	2.35543516664704e-05	0	0	0	0	0	0	0	0	0	0	0	0	0	0	0
Aerococcus_christensenii	0	0	0	0	0	0	0	0	0	0	0	0	0	0	0	2.35543516664704e-05	0	0	0	0	0	0	0	0	0	0	0	0	2.35543516664704e-05	0	0	0	0	0	0	0	0	0	0	0	0	0	0	0	0	0	0	0	0
Rothia_nasimurium	0	0	0	0	0	0	0	0	0	0	0	0	0	0	0	0	0	0	0	0	0	0	0	0	0	0	0	0	0	0	0	0	0	0	0	0	0	0	0	0	4.71087033329408e-05	0	0	0	0	0	0	0	0
uncultured_bacterium_adhufec153	0	0	0	0	0	0	0	0	0	0	0	0	0	0	0	0	0	0	0	0	2.35543516664704e-05	0	0	0	0	0	0	0	0	0	4.71087033329408e-05	0	0	0	0	0	0	0	0	0	0	0	0	0	0	0	0	0	0
Leuconostoc_carnosum	0	0	0	0	0	0	0	0	0	0	0	0	0	0	0	0	0	0	0	0	0	0	0	0	0	0	0	0	0	0	0	0	0	0	0	0	0	0	0	0	0	0	0	0	0	0	0	0	0
Selenomonas_sp._oral_taxon_478	0	0	2.35543516664704e-05	0	0	0	0	0	0	0	0	0	0	0	0	0	0	0	0	0	0	0	0	0	0	0	0	0	0	0	0	0	2.35543516664704e-05	0	0	0	0	0	0	0	0	0	0	0	0	0	0	0	0
Helicobacter_rodentium	0	0	0	0	0	0	0	0	0	0	0	0	0	0	0	0	0	0	0	0	0	0	0	0	0	0	0	0	0	0	0	0	0	0	0	0	0	0	0	0	0	0	0	0	0	0	0	0	0
Mobiluncus_curtisii	0	0	0	0	0	0	0	0	0	0	0	0	0	0	0	0	0	0	0	0	0	0	0	4.71087033329408e-05	0	0	0	0	0	0	0	0	0	0	0	0	0	0	0	0	0	0	0	0	0	0	0	0	0
Cryptobacterium_curtum_DSM_15641	0	0	0	0	0	0	0	0	0	0	0	0	0	0	0	0	0	0	0	0	0	0	0	0	0	0	0	0	0	0	0	0	0	0	0	0	0	0	0	0	0	0	0	0	0	0	0	0	0
Lactobacillus_parafarraginis	0	0	0	0	0	0	0	0	0	0	0	0	0	0	0	0	0	0	0	0	0	0	0	0	0	0	0	0	0	0	0	0	0	0	0	0	0	0	0	0	0	0	0	0	0	0	0	0	0
Sutterella_stercoricanis	0	0	0	0	0	0	0	0	7.06630549994111e-05	0	0	0	0	0	0	0	0	0	0	0	0	0	0	0	0	0	0	0	0	0	0	0	0	0	0	0	0	0	0	0	0	0	0	0	0	0	0	0	0
Actinomyces_massiliensis	0	0	0	0	0	0	0	0	0	0	0	0	0	0	2.35543516664704e-05	0	0	0	0	0	0	0	0	0	0	0	0	0	0	0	0	0	0	0	0	0	0	0	0	0	0	0	0	0	0	0	0	0	0
Dialister_micraerophilus	0	0	0	0	0	0	0	0	0	0	0	0	0	0	0	0	0	0	0	0	0	0	0	0	0	0	0	0	0	0	0	0	0	0	2.35543516664704e-05	0	0	0	0	0	0	0	0	0	0	0	0	0	0
Bacteroidetes_bacterium_oral_taxon_274	0	0	0	0	0	0	0	0	0	0	0	0	2.35543516664704e-05	0	0	0	0	0	0	0	0	2.35543516664704e-05	0	0	0	0	0	0	0	0	0	0	0	0	0	0	0	0	0	0	0	0	0	0	0	0	0	0	0
uncultured_Synergistetes_bacterium	0	0	0	0	0	0	0	0	0	0	0	0	0	0	0	0	0	0	0	0	0	0	0	0	0	0	0	0	0	0	0	0	0	0	0	0	0	0	0	0	0	0	0	0	0	0	0	0	0
Mageeibacillus_indolicus	0	0	0	0	0	0	0	0	0	0	0	0	0	0	0	0	0	0	0	0	0	0	0	0	0	0	0	0	0	7.06630549994111e-05	2.35543516664704e-05	0	0	0	0	0	0	0	0	0	0	0	0	0	0	0	0	0	0
Candidatus_Soleaferrea_massiliensis_AP7	0	0	0	0	0	0	0	0	0	0	0	0	0	0	0	0	0	0	0	0	0	0	0	0	0	0	0	0	0	0	0	0	0	0	0	0	0	0	0	0	0	0	0	0	0	0	0	0	0
uncultured_Clostridium_sp.	0	0	0	0	0	0	0	0	0	0	0	0	0	0	0	0	0	0	0	0	0	0	0	0	0	0	0	0	0	0	0	0	0	0	0	4.71087033329408e-05	0	0	0	0	0	0	0	0	0	0	0	0	0
Coprobacter_fastidiosus	0	0	0	0	0	0	0	0	0	0	0	0	0	0	0	0	0	0	0	0	0	0	0	0	0	0	0	0	0	0	0	0	0	0	0	0	0	0	0	0	0	0	0	0	0	0	0	0	0
Eubacterium_sp._oral_clone_FX028	0	0	0	0	0	0	0	0	0	0	0	0	0	0	0	0	0	0	0	0	0	0	0	0	0	0	0	0	0	0	0	0	0	0	0	0	0	0	0	0	0	0	0	0	0	0	2.35543516664704e-05	0	0
Capnocytophaga_ochracea	0	0	0	0	0	0	0	0	0	0	0	0	0	0	0	0	0	0	0	0	0	0	0	0	0	0	0	0	2.35543516664704e-05	0	0	0	0	2.35543516664704e-05	0	0	0	0	0	0	0	0	0	0	0	0	0	0	0
Alloprevotella_rava	0	0	7.06630549994111e-05	0	0	0	0	0	0	0	0	0	0	0	0	0	0	0	0	0	0	0	0	0	0	0	0	0	0	0	0	0	0	0	0	0	0	0	0	0	0	0	0	0	0	0	0	0	0
uncultured_human_oral_bacterium_A15	0	0	0	0	0	0	0	0	0	0	0	0	2.35543516664704e-05	0	0	0	0	0	0	0	0	0	0	0	0	0	0	0	0	0	0	0	0	0	0	0	0	0	0	0	0	0	0	0	0	0	0	0	0
Propionibacterium_sp._oral_strain_FMA5	0	0	0	0	0	0	0	0	0	0	0	0	0	0	0	0	0	0	0	0	0	0	0	0	0	0	0	0	0	0	0	0	0	0	0	0	0	0	0	0	0	0	0	0	0	0	0	0	0
Lactobacillus_rossiae	0	0	0	0	0	0	0	0	0	0	0	2.35543516664704e-05	0	0	0	0	0	0	0	0	0	0	0	0	0	0	0	0	0	0	0	0	0	0	0	0	0	0	0	0	0	0	0	0	0	0	0	0	0
Prevotella_sp._Smarlab_121567	0	0	0	0	0	0	0	0	0	0	0	0	0	0	0	0	0	0	0	0	0	0	0	0	0	7.06630549994111e-05	0	0	0	0	0	0	0	0	0	0	0	0	0	0	0	0	0	0	0	0	0	0	0
Clostridium_sp._826	0	0	0	0	0	0	0	0	0	0	0	0	0	0	0	0	0	0	0	0	0	0	0	0	0	0	0	0	0	0	0	0	0	0	0	0	0	0	0	0	0	0	0	0	0	0	0	0	0
uncultured_Acidaminococcaceae_bacterium	0	0	2.35543516664704e-05	0	0	0	0	0	0	0	0	0	0	0	0	0	0	0	0	0	0	0	0	0	0	0	0	0	0	0	0	0	0	0	0	0	0	0	0	0	0	0	0	0	0	0	0	0	0
Phocaeicola_abscessus	0	0	0	2.35543516664704e-05	0	0	0	0	0	0	0	0	0	0	0	0	0	0	0	0	0	0	0	0	0	0	0	0	0	0	0	0	0	0	0	0	0	0	0	0	0	0	0	0	0	0	0	0	0
uncultured_anaerobic_bacterium	0	0	0	0	0	0	0	0	0	0	0	0	0	0	0	0	0	0	0	0	0	0	0	0	0	0	0	0	0	0	0	0	0	0	0	0	0	0	0	0	0	0	0	0	0	0	0	0	0
Bacteroides_pectinophilus	0	0	0	0	0	0	0	0	0	0	0	0	0	0	0	0	0	0	0	0	0	0	0	0	0	0	0	0	0	0	0	0	0	0	0	0	0	0	0	0	0	0	0	0	0	0	0	0	0
unidentified_rumen_bacterium_RF39	0	0	0	0	0	0	0	0	0	0	0	0	0	0	0	0	0	0	0	0	0	0	0	0	0	0	0	0	0	0	0	0	0	0	0	0	0	0	0	0	0	0	0	0	0	0	0	0	0
Bacteroides_fragilis_YCH46	0	0	0	0	0	0	0	0	0	0	0	0	0	0	0	0	0	0	0	0	0	0	0	0	0	0	0	0	0	0	0	0	0	0	0	0	0	0	0	0	0	0	0	0	0	0	0	0	0
Prevotella_dentalis_DSM_3688	0	0	7.06630549994111e-05	0	0	0	0	0	0	0	0	0	0	0	0	0	0	0	0	0	0	0	0	0	0	0	0	0	0	0	0	0	0	0	0	0	0	0	0	0	0	0	0	0	0	0	0	0	0
Prevotella_heparinolytica	0	0	7.06630549994111e-05	0	0	0	0	0	0	0	0	0	0	0	0	0	0	0	0	0	0	0	0	0	0	0	0	0	0	0	0	0	0	0	0	0	0	0	0	0	0	0	0	0	0	0	0	0	0
Clostridiales_bacterium_60-7e	0	0	0	0	0	0	0	0	0	0	0	0	0	0	0	0	0	0	0	0	0	0	0	0	0	0	0	0	0	0	0	0	0	0	0	0	0	0	0	0	0	0	0	7.06630549994111e-05	0	0	0	0	0
Slackia_equolifaciens	0	0	0	0	0	0	0	0	0	0	0	0	0	0	0	0	0	0	0	0	0	0	0	0	0	0	0	0	0	0	0	0	0	0	0	0	0	0	0	0	0	0	0	0	0	0	0	0	0
Prevotella_sp._oral_taxon_H59	0	0	0	0	0	0	0	0	0	0	0	0	0	0	0	0	0	0	0	0	0	0	0	0	0	0	0	0	0	0	0	0	0	0	0	0	0	0	0	0	0	0	0	0	0	0	0	0	0
uncultured_Enterobacter_sp.	0	0	0	0	0	0	0	0	0	0	0	0	0	0	0	0	0	0	0	0	0	0	0	0	0	0	0	0	0	0	0	0	0	0	0	0	0	0	0	0	0	0	0	0	0	0	0	0	0
uncultured_Capnocytophaga_sp.	0	0	0	0	0	0	0	0	0	0	0	0	0	0	0	0	0	0	0	0	0	0	0	0	0	0	0	0	0	0	0	0	0	0	0	0	0	0	0	0	0	0	0	0	0	0	0	0	0
uncultured_Bacteroides_sp.	0	0	0	0	0	0	0	0	0	0	0	0	0	0	0	0	0	0	0	0	0	0	0	0	0	0	0	0	0	0	0	0	0	0	0	0	0	0	0	0	0	0	0	0	0	0	0	0	0
uncultured_Kopriimonas_sp.	0	0	0	0	0	0	0	0	0	0	0	0	0	0	0	0	0	0	0	0	0	0	0	0	0	0	0	0	0	0	0	0	0	0	0	0	0	0	0	0	0	0	0	0	0	0	0	0	0
Eubacterium_sp._oral_clone_BU014	0	0	0	0	0	0	0	0	0	0	0	0	0	0	0	0	0	0	0	0	0	0	0	0	0	0	0	0	0	0	0	0	0	0	0	0	0	0	0	0	0	0	0	0	0	0	0	0	0
Anoxybacillus_flavithermus	0	0	0	0	0	0	0	0	0	0	0	0	0	0	0	0	0	0	0	0	0	0	0	0	0	0	0	0	0	0	0	0	0	0	0	0	0	0	0	0	0	0	0	0	0	0	0	0	0
Prevotella_bergensis	0	0	0	0	0	0	0	0	0	0	0	0	0	0	0	0	0	0	0	0	0	0	0	2.35543516664704e-05	0	0	0	0	0	0	0	0	0	0	0	0	0	0	0	0	0	0	0	0	0	0	0	0	0
Bacteroides_sp._DJF_B097	0	0	0	0	0	0	0	0	0	0	0	0	0	0	0	0	0	0	0	0	0	0	0	0	0	0	0	0	0	0	0	0	0	2.35543516664704e-05	2.35543516664704e-05	0	0	0	0	0	0	0	0	0	0	0	0	0	0
Prevotella_sp._oral_taxon_526	0	0	0	4.71087033329408e-05	0	0	0	0	0	0	0	0	0	0	0	0	0	0	0	0	0	0	0	0	0	0	0	0	0	0	0	0	0	0	0	0	0	0	0	0	0	0	0	0	0	0	0	0	0
uncultured_bacterium_adhufec101	0	0	0	0	0	0	0	0	0	0	0	0	0	0	0	0	0	0	0	0	0	0	0	0	0	0	0	0	0	0	0	0	0	0	0	0	0	0	0	0	0	0	0	0	0	0	0	0	0
bacterium_P1C12	0	0	0	0	0	0	0	0	0	0	0	0	0	0	0	0	0	0	0	0	0	0	0	0	0	0	0	0	0	0	0	0	0	0	0	0	0	0	0	0	0	0	0	0	0	0	0	0	0
uncultured_Sutterellaceae_bacterium	0	0	0	0	0	0	0	0	0	0	0	0	0	0	0	0	0	0	0	0	0	0	0	0	0	0	0	0	0	0	0	0	0	0	0	0	0	0	0	0	0	0	0	0	0	0	0	0	0
Weissella_ceti	0	0	0	0	0	0	0	0	0	0	0	0	0	0	0	0	0	0	0	0	0	0	0	0	0	0	0	0	0	0	0	0	0	0	0	0	0	0	0	0	0	0	0	0	0	0	0	0	0
TM7_phylum_sp._oral_clone_BU080	0	0	0	0	0	0	0	0	0	0	0	0	0	0	0	0	0	0	0	0	0	0	0	0	0	0	0	0	0	0	0	0	0	0	0	0	0	0	0	0	0	0	0	0	0	0	0	0	0
Peptoniphilus_duerdenii	0	0	0	0	0	0	0	0	0	0	0	0	0	0	0	0	0	0	0	0	0	0	0	0	0	0	0	0	0	0	0	0	0	0	0	0	0	0	0	0	0	0	0	0	0	0	0	0	0
Corynebacterium_imitans	0	0	0	0	0	0	0	0	0	0	0	0	0	0	0	0	0	0	0	0	0	0	0	0	0	0	0	0	0	0	0	0	0	0	0	0	0	0	0	0	0	0	0	0	0	0	0	0	0
Veillonellaceae_bacterium_DNF00626	0	0	0	0	0	0	0	0	0	0	0	0	2.35543516664704e-05	0	0	0	0	0	0	0	0	0	0	0	0	0	0	0	0	0	0	0	0	0	0	0	0	0	0	0	0	0	0	0	0	0	0	0	0
Peptoniphilus_obesi_ph1	0	0	0	0	0	0	0	0	0	0	0	0	0	0	0	0	0	0	0	0	0	0	0	0	0	0	0	0	0	0	0	0	0	0	0	0	0	0	0	0	0	0	0	0	0	0	0	0	0
Eubacteriaceae_bacterium_DJF_B077	0	0	0	0	0	0	0	0	0	0	0	0	0	0	0	0	0	0	0	0	0	0	0	0	0	0	0	0	0	0	2.35543516664704e-05	0	0	0	0	0	0	0	0	0	0	0	0	0	0	0	0	0	0
Idiomarina_taiwanensis	0	0	0	0	0	0	0	0	0	0	0	0	0	2.35543516664704e-05	0	0	0	0	0	0	0	0	0	0	0	0	0	0	0	0	0	0	0	0	0	0	0	0	0	0	0	0	0	0	0	0	0	0	0
uncultured_bacterium_adhufec55	0	0	0	0	0	0	0	0	0	0	0	0	0	0	2.35543516664704e-05	0	0	0	0	0	0	0	0	0	0	0	0	0	0	0	0	0	0	0	0	0	0	0	0	0	0	0	0	0	0	0	0	0	0
Treponema_denticola_OTK	0	0	0	0	0	0	0	0	0	0	0	0	0	0	0	0	0	0	0	0	0	0	0	0	0	0	0	0	0	0	0	0	0	0	0	0	0	0	0	0	0	0	0	0	0	0	0	0	0
GN02_bacterium_human_oral_taxon_HOT-873	0	0	0	0	0	0	0	0	0	0	0	0	0	0	0	0	0	0	0	0	0	2.35543516664704e-05	0	0	0	0	0	0	0	0	0	0	0	0	0	0	0	0	0	0	0	0	0	0	0	0	0	0	0
Bifidobacterium_bifidum_BGN4	0	0	0	0	0	0	0	0	0	0	0	0	0	0	0	0	0	0	0	0	0	0	0	0	0	0	0	0	0	0	0	0	0	2.35543516664704e-05	0	0	0	0	0	0	0	0	0	0	0	0	0	0	0
Sphingomonas_kaistensis	0	0	0	0	0	0	0	0	0	0	0	0	0	0	0	0	0	0	0	0	0	0	0	0	0	0	0	0	0	0	0	0	0	0	2.35543516664704e-05	0	0	0	0	0	0	0	0	0	0	0	0	0	0
Rahnella_aquatilis	0	0	0	0	0	0	0	0	0	0	0	0	0	0	0	0	0	0	0	0	0	0	0	0	0	0	0	0	0	0	0	0	0	0	0	0	0	0	0	0	0	0	0	0	0	0	0	0	0
uncultured_bacterium_adhufec236	0	0	0	0	0	0	0	0	0	0	0	0	0	0	0	0	0	0	0	0	0	0	0	0	0	0	0	0	0	0	0	0	0	0	0	0	0	0	0	0	0	0	0	0	0	0	0	0	0
Chloroflexi_bacterium_human_oral_taxon_HOT-439	0	0	0	0	0	0	0	0	0	0	0	0	0	0	0	0	0	0	0	0	0	0	0	0	0	0	0	0	0	0	0	0	0	0	0	0	0	0	0	0	0	0	0	0	0	0	0	0	0
Lactobacillus_acetotolerans	0	0	0	0	0	0	0	0	0	0	0	0	0	0	0	0	0	0	0	0	0	0	0	0	0	0	0	0	0	0	0	0	0	0	0	0	0	0	0	0	0	0	0	0	0	0	0	0	0
Mitsuokella_sp._oral_taxon_G68	0	0	0	0	0	0	0	0	0	0	0	0	0	0	0	0	0	0	0	0	0	0	0	0	0	0	0	0	0	0	0	0	0	0	0	0	0	0	0	0	0	0	0	0	0	0	0	0	0
uncultured_bacterium_adhufec172	0	0	0	0	0	0	0	0	0	0	0	0	0	0	0	0	0	0	0	0	0	0	0	0	0	0	0	0	0	0	0	0	0	0	0	0	0	0	0	0	0	0	0	0	0	0	0	0	0
uncultured_Bacteroidaceae_bacterium	0	0	0	0	0	0	0	0	0	0	0	0	0	0	0	0	0	0	0	0	0	0	0	0	0	0	0	0	0	0	0	0	0	0	0	0	0	2.35543516664704e-05	0	0	0	0	0	0	0	0	0	0	0
Clostridium_sp._MDA2315	0	0	0	0	0	0	0	0	0	0	0	0	0	0	0	0	0	0	0	0	0	0	0	0	0	0	0	0	0	0	0	0	0	0	0	0	0	0	0	0	0	0	0	0	0	0	0	0	0
Lactobacillus_sp._oral_taxon_052	0	0	0	0	0	0	0	0	0	0	0	0	0	0	0	0	0	0	0	0	0	0	0	0	0	0	0	0	0	0	0	0	0	0	0	0	0	0	0	0	0	0	0	0	0	0	0	0	0
uncultured_marine_bacterium	0	0	0	0	0	0	0	0	0	0	0	0	0	0	0	0	0	0	0	0	0	0	0	0	0	0	0	0	0	0	0	0	0	0	0	0	0	0	0	0	0	0	0	0	0	0	0	0	0
[truncated: 137 more columns]
