# Supplementary material for: Characteristics of the gut microbiome in patients with prediabetes and type 2 diabetes
Source: PeerJ journal article supplement (doi:10.7717/peerj.10952), 2021-03-24
Supplement: sequence.zip [file sequence.zip]

Samples	Raw_reads	Q20(%)	Q30(%)	Merge	Merge(%)	Primer	Clean_reads	Clean_reads(%)	Q20(%)	Q30(%)
106	116019	98.28	94.73	114877	99.02	114516	108848	93.82	99.06	96.04
110	111967	98.28	94.70	110917	99.06	110647	104872	93.66	99.07	96.02
102	107570	98.34	94.89	106185	98.71	105923	101470	94.33	99.10	96.29
101	124314	98.11	94.29	123234	99.13	122893	116198	93.47	99.04	95.99
10	111742	98.27	94.78	110727	99.09	110332	104251	93.30	99.06	96.10
100	96211	98.37	94.92	95361	99.12	95096	90498	94.06	99.09	96.13
103	136531	98.34	94.92	135358	99.14	135037	128456	94.09	99.12	96.24
105	130235	98.21	94.40	128748	98.86	128391	122054	93.72	99.07	95.94
108	142610	98.37	94.87	141375	99.13	140887	134739	94.48	99.16	96.43
116	117681	97.73	92.97	116594	99.08	116282	109574	93.11	98.83	95.17
107	146407	98.04	94.05	144850	98.94	144303	136721	93.38	99.04	95.90
113	136639	98.04	93.93	135330	99.04	134872	128597	94.11	98.99	95.77
109	149435	98.24	94.74	148007	99.04	147512	139091	93.08	99.11	96.25
104	144193	98.36	94.89	142650	98.93	142288	134892	93.55	99.04	95.98
115	130622	98.09	94.17	129416	99.08	129108	122618	93.87	99.05	95.97
112	110894	98.35	94.90	109791	99.01	109450	104349	94.10	99.13	96.29
114	145467	98.26	94.70	144028	99.01	143574	135426	93.10	99.00	95.87
111	132309	98.36	94.99	131073	99.07	130662	124206	93.88	99.12	96.26
11	117689	97.94	93.71	116411	98.91	115949	109647	93.17	98.98	95.69
117	114693	98.23	94.61	113553	99.01	113224	106470	92.83	99.06	95.96
118	126240	98.38	95.01	125060	99.07	124745	118676	94.01	99.13	96.24
120	146471	98.38	94.95	145017	99.01	144566	137735	94.04	99.08	96.09
121	115419	98.32	94.90	114341	99.07	114064	108580	94.07	99.11	96.21
119	150809	98.26	94.61	149444	99.09	148948	141254	93.66	99.01	95.83
124	117365	95.72	87.51	116050	98.88	115574	99706	84.95	97.81	91.77
122	135783	98.17	94.46	134641	99.16	134295	128136	94.37	99.10	96.32
123	126325	98.34	94.86	125140	99.06	124707	118497	93.80	99.07	96.05
126	127252	98.09	94.17	126030	99.04	125606	119045	93.55	99.02	95.89
14	94636	98.44	94.93	93343	98.63	92769	88196	93.19	99.05	95.88
12	129822	98.17	94.51	128575	99.04	128076	121241	93.39	99.07	96.14
125	133062	98.31	94.89	131857	99.09	131485	126480	95.05	99.14	96.53
13	119966	98.23	94.57	118733	98.97	117543	111569	93.00	99.05	96.01
15	121032	98.17	94.43	119857	99.03	119511	113158	93.49	99.03	95.95
16	109069	98.25	94.52	108103	99.11	107778	102583	94.05	99.04	95.93
17	129555	98.24	94.51	128281	99.02	127819	122061	94.22	99.06	96.07
1	96271	98.07	94.12	95310	99.00	94758	89504	92.97	99.02	95.78
18	133615	98.50	95.05	132128	98.89	131670	124803	93.40	99.04	95.83
19	130953	98.20	94.56	129483	98.88	128967	122318	93.41	99.07	96.10
22	127605	98.35	94.95	126465	99.11	126008	120036	94.07	99.08	96.14
25	119370	98.33	94.88	118196	99.02	117156	111639	93.52	99.07	96.08
20	139884	98.33	94.85	138494	99.01	137976	131795	94.22	99.10	96.21
23	139496	98.22	94.62	138204	99.07	137761	130839	93.79	99.10	96.24
21	115249	98.32	94.83	114032	98.94	113561	108133	93.83	99.07	96.07
26	122423	97.40	92.01	121340	99.12	121058	114005	93.12	98.79	94.92
24	134620	96.31	89.01	133267	98.99	132918	122892	91.29	98.34	93.53
27	115737	98.14	94.26	114595	99.01	114228	108163	93.46	99.00	95.70
28	130181	98.21	94.48	129028	99.11	128626	122236	93.90	99.03	95.91
29	117046	98.18	94.44	115797	98.93	115300	109222	93.32	99.05	96.00
31	135896	98.20	94.44	134757	99.16	134206	127967	94.17	99.06	96.08
34	123907	98.31	94.84	122758	99.07	122285	116925	94.37	99.12	96.29
33	117817	98.08	94.05	116681	99.04	116220	109806	93.20	98.98	95.70
32	138814	98.23	94.50	137317	98.92	136639	126919	91.43	98.79	95.19
2	113101	98.32	94.85	112008	99.03	111462	105637	93.40	99.10	96.14
30	156430	98.26	94.73	154974	99.07	154363	147309	94.17	99.12	96.27
35	134716	98.31	94.98	133338	98.98	132752	125337	93.04	99.12	96.26
39	124859	98.20	94.56	123650	99.03	123251	116618	93.40	99.08	96.11
40	123771	97.72	93.03	122624	99.07	122288	115581	93.38	98.90	95.47
41	107169	98.11	94.31	106105	99.01	105740	99550	92.89	99.02	95.85
3	138298	98.29	94.65	137018	99.07	136615	129995	94.00	99.04	95.98
37	103108	98.24	94.66	102137	99.06	101819	96694	93.78	99.08	96.20
38	140254	98.26	94.79	138806	98.97	138349	130448	93.01	99.12	96.30
36	160202	98.33	94.87	158742	99.09	158250	151289	94.44	99.13	96.29
42	100897	98.33	94.87	100028	99.14	99652	94989	94.14	99.12	96.31
44	137451	98.24	94.67	136126	99.04	135656	128535	93.51	99.07	96.07
43	137329	98.09	94.06	136087	99.10	135655	128470	93.55	98.98	95.73
49	81178	98.20	94.60	80417	99.06	80083	75676	93.22	99.11	96.23
45	153676	98.33	94.85	152116	98.98	151668	144379	93.95	99.08	96.13
4	131979	98.35	94.94	130758	99.07	130406	124382	94.24	99.11	96.23
48	161296	98.02	93.90	159863	99.11	159212	151659	94.03	99.01	95.91
46	124297	98.24	94.62	123140	99.07	122683	115476	92.90	99.04	95.94
47	151621	98.14	94.38	150046	98.96	149421	141195	93.12	99.07	96.02
50	148162	98.29	94.84	146675	99.00	146157	138195	93.27	99.08	96.17
51	128392	98.34	94.90	127172	99.05	126679	120478	93.84	99.10	96.18
54	136563	98.36	94.86	135348	99.11	134875	128922	94.40	99.05	96.03
53	111260	98.05	93.97	110244	99.09	109834	103984	93.46	98.99	95.75
55	126415	98.26	94.62	125254	99.08	124958	118975	94.11	99.05	96.02
56	125082	98.18	94.43	123988	99.13	123625	118088	94.41	99.07	96.12
57	111930	98.37	94.81	110729	98.93	110415	104990	93.80	99.06	95.93
58	127752	98.23	94.58	126647	99.14	126258	119578	93.60	99.05	96.04
52	132623	98.35	94.90	131318	99.02	130867	125144	94.36	99.10	96.21
5	92003	98.14	94.36	91200	99.13	91008	86786	94.33	99.09	96.34
59	142542	98.23	94.55	141305	99.13	140789	134697	94.50	99.08	96.24
62	139873	98.30	94.76	138644	99.12	138211	131946	94.33	99.11	96.27
61	99699	98.22	94.55	98553	98.85	98210	92841	93.12	99.07	95.98
60	147739	98.20	94.49	146387	99.08	145826	139311	94.30	99.09	96.20
65	121637	98.11	94.19	120560	99.11	120178	114964	94.51	99.06	96.13
64	117979	98.32	94.77	116976	99.15	116669	111770	94.74	99.03	95.95
63	154351	98.30	94.79	152803	99.00	152350	145481	94.25	99.11	96.27
66	122215	98.25	94.61	121021	99.02	120630	114627	93.79	99.05	95.98
67	123324	98.29	94.74	121997	98.92	121536	115518	93.67	99.08	96.08
68	91750	98.21	94.52	90803	98.97	90500	86003	93.74	99.05	95.99
73	75328	98.54	95.15	74631	99.07	74393	70525	93.62	99.03	95.77
72	123139	98.38	95.02	121993	99.07	121494	115520	93.81	99.13	96.21
70	73139	98.23	94.56	72287	98.84	72014	68191	93.23	99.08	96.06
69	135818	96.43	89.33	134599	99.10	134233	125660	92.52	98.46	94.01
6	140391	98.43	95.12	138895	98.93	138514	131225	93.47	99.02	95.88
71	132997	98.31	94.83	131489	98.87	130878	123938	93.19	99.04	95.99
74	109985	98.17	94.56	108663	98.80	108350	102245	92.96	99.10	96.23
78	118917	98.33	94.87	117956	99.19	117660	111827	94.04	99.10	96.17
77	116438	97.98	93.69	115295	99.02	114928	108779	93.42	98.91	95.42
76	135515	98.17	94.38	134224	99.05	133813	126798	93.57	99.06	95.98
75	146873	98.08	94.05	145488	99.06	145060	138382	94.22	99.02	95.87
80	91220	98.27	94.80	90353	99.05	90113	85219	93.42	99.10	96.17
79	123072	98.35	94.96	121626	98.83	121330	116303	94.50	99.15	96.42
82	111195	98.34	94.94	110156	99.07	109871	104715	94.17	99.11	96.26
84	79685	97.94	93.73	78874	98.98	78595	74183	93.10	98.98	95.73
81	125545	97.64	92.78	124449	99.13	124119	117864	93.88	98.89	95.49
83	139012	98.37	95.03	137580	98.97	137135	130502	93.88	99.10	96.23
7	129321	98.28	94.66	128073	99.03	127705	121519	93.97	99.09	96.08
85	97789	98.30	94.74	96932	99.12	96643	91584	93.65	99.05	96.00
86	131334	98.01	93.89	129908	98.91	129523	122766	93.48	99.01	95.85
88	86004	97.90	93.52	85184	99.05	84910	80046	93.07	98.88	95.37
91	103568	98.42	94.97	102657	99.12	102345	97743	94.38	99.10	96.11
89	141536	98.29	94.75	140271	99.11	139862	133126	94.06	99.09	96.24
90	146609	98.29	94.78	145212	99.05	144790	138006	94.13	99.06	96.16
87	146596	98.37	94.99	145249	99.08	144767	138017	94.15	99.07	96.18
93	117022	98.29	94.80	115924	99.06	115577	109305	93.41	99.09	96.12
8	149904	98.35	95.01	148461	99.04	148031	140668	93.84	99.11	96.22
92	156844	98.30	94.60	155409	99.09	154970	147440	94.00	99.04	95.93
97	145369	98.33	94.86	143982	99.05	143619	136784	94.09	99.17	96.41
95	125399	98.11	94.06	124135	98.99	123738	117064	93.35	98.93	95.45
94	143453	98.26	94.67	140993	98.29	140575	133306	92.93	99.02	95.89
96	150055	98.38	94.99	148555	99.00	148015	140426	93.58	99.06	96.04
98	105590	94.72	85.44	102772	97.33	102273	79314	75.12	97.43	90.62
9	129974	98.33	94.81	128787	99.09	128457	122350	94.13	99.06	96.08
99	143430	98.47	95.24	142176	99.13	141866	135494	94.47	99.12	96.30
DJH_A	113016	98.32	94.76	112036	99.13	111652	106625	94.35	99.08	96.08
DJH_B	104243	98.29	94.71	103294	99.09	102888	97937	93.95	99.05	95.98
GYB_A	107765	98.30	94.80	106824	99.13	106548	101272	93.97	99.08	96.18
DLC_A	123483	98.25	94.58	122368	99.10	122063	116689	94.50	99.08	96.18
DLC_B	133525	98.40	95.03	132361	99.13	131884	125877	94.27	99.12	96.29
GYB_B	112548	95.34	86.61	111161	98.77	110774	98971	87.94	97.94	92.33
MBK_B	100045	98.28	94.75	99129	99.08	98805	93546	93.50	99.08	96.18
KYL_A	131872	98.26	94.72	130607	99.04	129975	123734	93.83	99.11	96.25
HLM	66680	94.07	83.94	65954	98.91	65693	50358	75.52	97.24	90.15
MC_A	110620	98.25	94.62	109597	99.08	109301	104023	94.04	99.06	96.06
MBK_A	125118	98.38	95.08	124000	99.11	123599	117741	94.10	99.11	96.32
MGM_A	96232	98.36	94.95	95339	99.07	94720	90297	93.83	99.08	96.12
KYL_B	107500	97.74	93.03	106556	99.12	106274	101164	94.11	98.95	95.63
MGQ_A	89989	98.31	94.78	89130	99.05	88617	84627	94.04	99.05	96.06
MC_B	120775	98.25	94.56	119749	99.15	119352	114141	94.51	99.08	96.11
MGL_A	114479	98.26	94.70	113350	99.01	112874	107060	93.52	99.11	96.21
MGM_B	117548	98.19	94.45	116488	99.10	116131	110463	93.97	99.07	96.08
MGL_B	122247	98.34	94.93	121064	99.03	120658	114894	93.99	99.09	96.21
MGQ_B	124954	98.23	94.65	123848	99.11	123447	117004	93.64	99.09	96.22
MJF_A	125876	98.31	94.82	124477	98.89	124071	118157	93.87	99.03	95.99
MLL_A	87042	97.82	93.29	86223	99.06	85856	80919	92.97	98.86	95.29
MJF_B	134497	98.36	94.99	133335	99.14	132867	126821	94.29	99.13	96.36
MM_B	115577	98.33	94.93	114499	99.07	114080	108544	93.91	99.13	96.30
MJS_A	117967	97.57	92.57	116731	98.95	116320	110332	93.53	98.88	95.33
MJS_B	116718	98.28	94.83	115668	99.10	115222	109367	93.70	99.07	96.09
MM_A	124134	98.30	94.78	123041	99.12	122554	116835	94.12	99.11	96.24
MLL_B	130458	98.30	94.81	129385	99.18	128977	122925	94.23	99.16	96.39
MSF_A	97155	97.80	93.28	96245	99.06	95794	90931	93.59	98.96	95.67
MW_A	101347	98.40	95.00	100434	99.10	100145	95392	94.12	99.07	96.06
MWC_B	116922	98.40	95.01	115930	99.15	115533	110612	94.60	99.12	96.26
MXZ_A	88964	98.10	94.16	88110	99.04	87636	82864	93.14	98.95	95.65
MW_B	111709	97.86	93.35	110699	99.10	110320	104425	93.48	98.92	95.39
MXG_B	120499	98.37	94.92	118810	98.60	118213	109613	90.97	98.82	95.30
MXZ_B	124499	98.39	95.11	123458	99.16	123065	117716	94.55	99.16	96.47
MXG_A	107948	98.40	95.11	106975	99.10	106622	102062	94.55	99.11	96.38
MYC_A	119606	98.31	94.85	118456	99.04	117990	112274	93.87	99.06	96.18
MSF_B	135803	98.32	94.89	134376	98.95	133848	126844	93.40	99.10	96.13
MYL_A	96886	97.56	92.52	96091	99.18	95771	90131	93.03	98.83	95.14
MZhiL_A	117724	97.51	92.34	116584	99.03	116164	108796	92.42	98.74	94.85
MYL_B	110502	98.13	94.29	109417	99.02	108740	102713	92.95	99.00	95.81
MYC_B	119478	98.27	94.69	118469	99.16	117915	112548	94.20	99.06	96.11
MZhiL_B	108613	98.43	95.23	107610	99.08	107080	101837	93.76	99.10	96.21
MZL_A	105226	98.28	94.72	104207	99.03	103834	99017	94.10	99.11	96.20
MZL_B	99188	98.29	94.83	98153	98.96	97778	92824	93.58	99.05	96.04
MZJ_B	132630	98.31	94.84	131399	99.07	130994	124881	94.16	99.14	96.28
N10	93514	98.25	94.63	92514	98.93	92159	87758	93.84	99.04	95.97
MZX_A	106523	98.35	94.95	105558	99.09	105256	100288	94.15	99.10	96.20
N12	106146	98.26	94.70	105142	99.05	104824	99871	94.09	99.04	96.05
N11	121634	98.22	94.51	120480	99.05	120068	114084	93.79	99.03	95.91
MZX_B	128175	98.29	94.77	127048	99.12	126628	120332	93.88	99.09	96.16
N14	104365	97.88	93.57	103284	98.96	103005	97045	92.99	98.96	95.62
MZJ_A	120274	98.41	95.00	119241	99.14	118802	113707	94.54	99.10	96.17
N15	125076	97.90	93.57	123812	98.99	123440	116911	93.47	98.90	95.47
N19	104965	97.96	93.67	103870	98.96	103550	97375	92.77	98.86	95.22
N18	123438	98.30	94.84	122245	99.03	121893	115842	93.85	99.09	96.15
N17	109640	98.28	94.74	108613	99.06	108313	103487	94.39	99.07	96.18
N16	127417	98.27	94.67	126160	99.01	125797	119903	94.10	99.07	96.05
N20	98784	97.53	92.37	97756	98.96	97426	91659	92.79	98.73	94.82
N23	78024	97.89	93.52	77237	98.99	76978	72960	93.51	98.97	95.63
N1	131480	98.07	94.07	130260	99.07	129864	122843	93.43	98.99	95.79
N24	87528	98.48	95.23	86769	99.13	86513	82945	94.76	99.09	96.15
N22	111293	98.42	95.08	110168	98.99	109874	105121	94.45	99.14	96.28
N25	131624	98.32	94.92	130517	99.16	130081	123478	93.81	99.13	96.27
N21	112117	98.29	94.84	111059	99.06	110688	105087	93.73	99.06	96.08
N26	96644	98.40	94.99	95823	99.15	95567	91058	94.22	99.13	96.19
N29	117506	97.40	91.99	116430	99.08	116131	108797	92.59	98.70	94.72
N28	124048	98.05	94.05	122872	99.05	122548	116442	93.87	99.03	95.88
N2	129701	98.29	94.79	128537	99.10	128142	122430	94.39	99.08	96.21
N27	114636	98.04	93.95	113535	99.04	113255	107866	94.09	98.97	95.82
N30	117816	97.87	93.51	116590	98.96	116254	110123	93.47	98.95	95.61
N32	88351	98.40	95.13	87334	98.85	87086	82529	93.41	99.12	96.20
N31	102607	98.43	95.17	101301	98.73	101014	96111	93.67	99.07	96.08
N33	107257	98.24	94.52	106132	98.95	105676	100280	93.50	99.01	95.79
N38	68283	98.04	93.98	67475	98.82	67238	63580	93.11	98.94	95.62
N41	124699	98.40	95.18	123476	99.02	123065	117198	93.98	99.13	96.34
N40	102193	98.20	94.57	100724	98.56	100385	94848	92.81	99.07	96.07
N34	109047	98.08	94.10	107837	98.89	107412	102031	93.57	99.03	95.84
N36	100830	98.28	94.74	99855	99.03	99484	94275	93.50	99.08	96.07
N37	104578	98.19	94.64	103371	98.85	102988	96962	92.72	99.09	96.10
N35	130169	98.33	94.95	128836	98.98	128370	122700	94.26	99.13	96.36
N3	130148	98.22	94.60	128911	99.05	128529	122082	93.80	99.08	96.13
N39	147219	98.37	94.91	145754	99.00	145262	137548	93.43	99.08	96.01
N42	131138	98.19	94.55	129586	98.82	129169	121997	93.03	99.03	95.94
N45	111564	98.22	94.57	110499	99.05	110126	104394	93.57	99.07	96.15
N44	125811	98.30	94.75	124494	98.95	124077	117821	93.65	99.05	95.98
N43	122488	97.93	93.75	121248	98.99	120806	113569	92.72	98.98	95.66
N47	107590	98.43	95.14	106561	99.04	106210	101790	94.61	99.13	96.38
N48	108090	98.02	93.90	106969	98.96	106620	101435	93.84	99.01	95.82
N49	115597	98.16	94.34	114514	99.06	114128	108650	93.99	99.07	96.04
N46	119676	98.10	94.09	118436	98.96	117973	111123	92.85	98.87	95.40
N50	85655	98.14	94.21	84775	98.97	84459	79517	92.83	98.94	95.49
N51	110863	98.24	94.57	109870	99.10	109525	104189	93.98	98.98	95.82
N52	122472	98.15	94.40	121265	99.01	120833	113724	92.86	99.02	95.84
N53	122532	98.22	94.64	121179	98.90	120786	114904	93.77	99.08	96.17
N54	134840	98.29	94.91	132082	97.95	131766	125002	92.70	99.07	96.27
N5	144712	98.29	94.79	143419	99.11	142941	135815	93.85	99.07	96.19
N4	151027	98.09	94.05	149650	99.09	149161	142049	94.06	99.00	95.81
N8	87772	98.28	94.68	86975	99.09	86679	82753	94.28	99.03	95.96
N6	197414	98.27	94.82	195300	98.93	194438	184151	93.28	99.08	96.20
XYZ_A	113158	98.33	94.91	112076	99.04	111375	105865	93.56	99.10	96.19
YBZ_A	129961	98.42	95.17	128789	99.10	128297	121624	93.58	99.09	96.16
YBZ_B	120533	98.27	94.70	119402	99.06	118916	113454	94.13	99.10	96.19
WYN_A	104730	98.30	94.71	103786	99.10	103378	98551	94.10	99.11	96.20
N7	110465	98.36	94.81	109478	99.11	109113	103604	93.79	99.02	95.90
WYN_B	94327	97.76	93.01	93480	99.10	93142	88660	93.99	98.95	95.56
N9	116172	98.25	94.68	114932	98.93	114507	108133	93.08	99.05	95.95
XYZ_B	132839	98.33	94.97	131530	99.01	131019	123737	93.15	99.08	96.14
YZ_B	102332	98.11	94.31	101367	99.06	100801	95455	93.28	99.04	96.05
YFH_B	112585	98.41	95.17	111521	99.05	111134	106094	94.23	99.14	96.38
YZQ_A	110784	98.07	94.06	109760	99.08	109412	103374	93.31	98.97	95.72
YZ_A	122149	98.07	94.08	120992	99.05	120598	114685	93.89	99.03	95.89
YFH_A	112547	98.25	94.65	111569	99.13	111178	106029	94.21	99.11	96.21
YZQ_B	106896	98.32	94.76	105958	99.12	105588	101075	94.55	99.09	96.15
MWC_A	125344	98.28	94.70	124075	98.99	123302	115781	92.37	99.19	96.51
