# Supplementary figures and images for: Characteristics of the gut microbiome in patients with prediabetes and type 2 diabetes
Source: PeerJ journal article supplement (doi:10.7717/peerj.10952), 2021-03-24

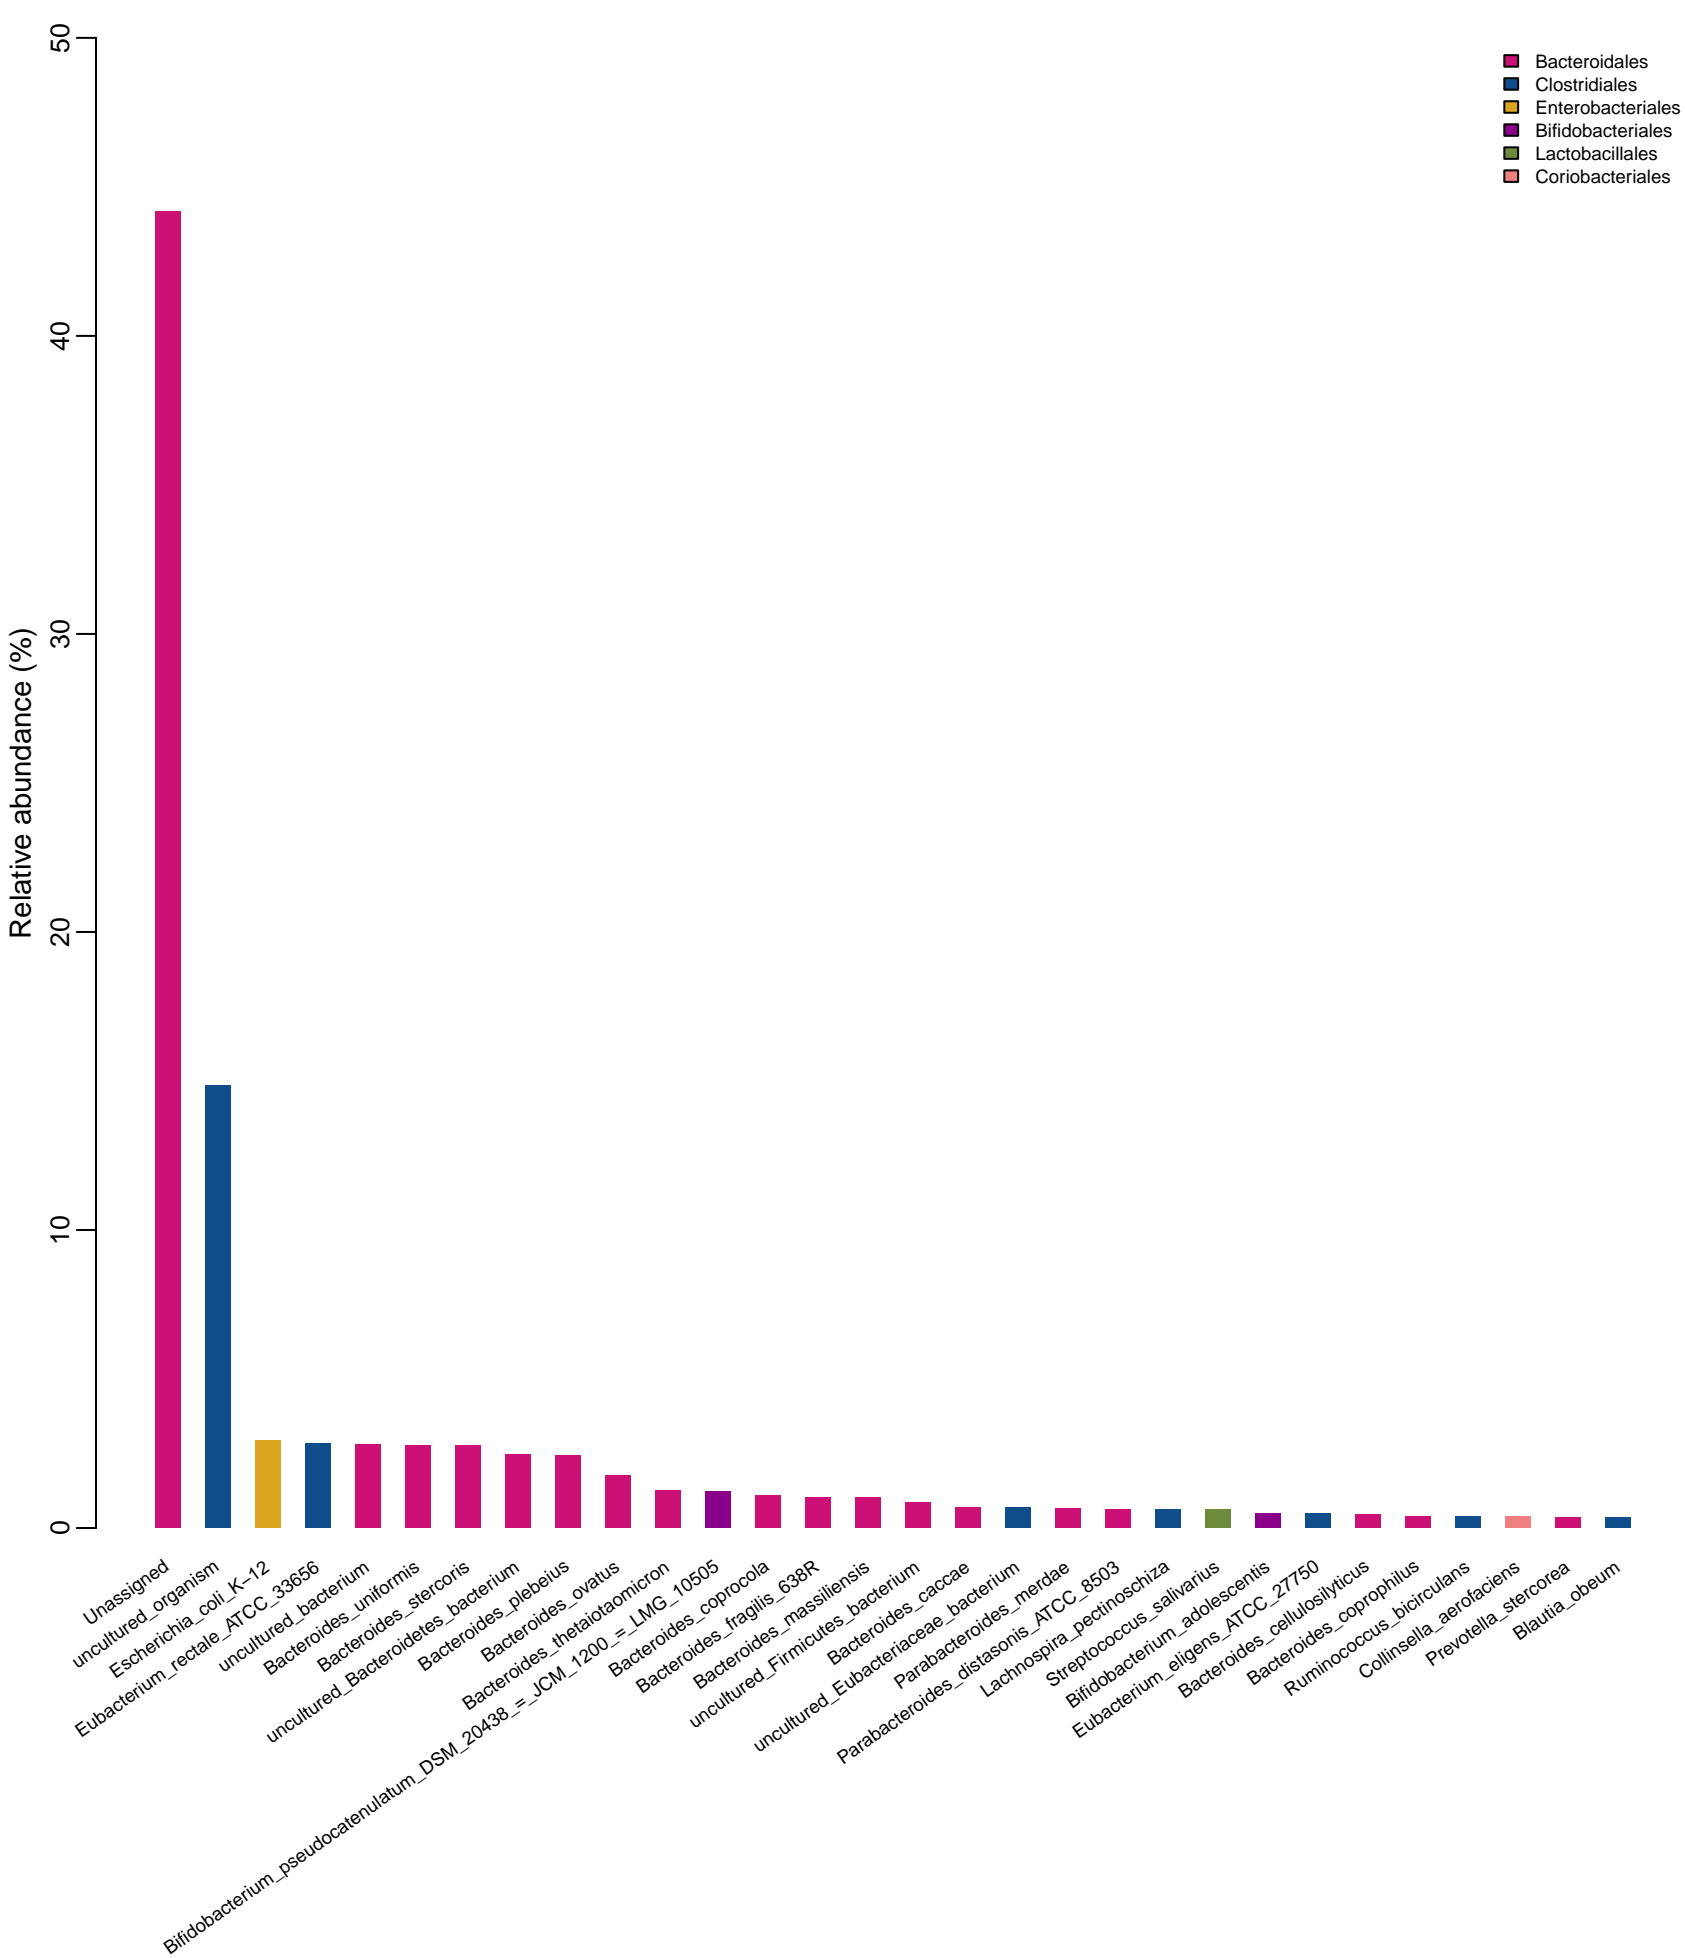

Supplement: data.zip [file data.zip]

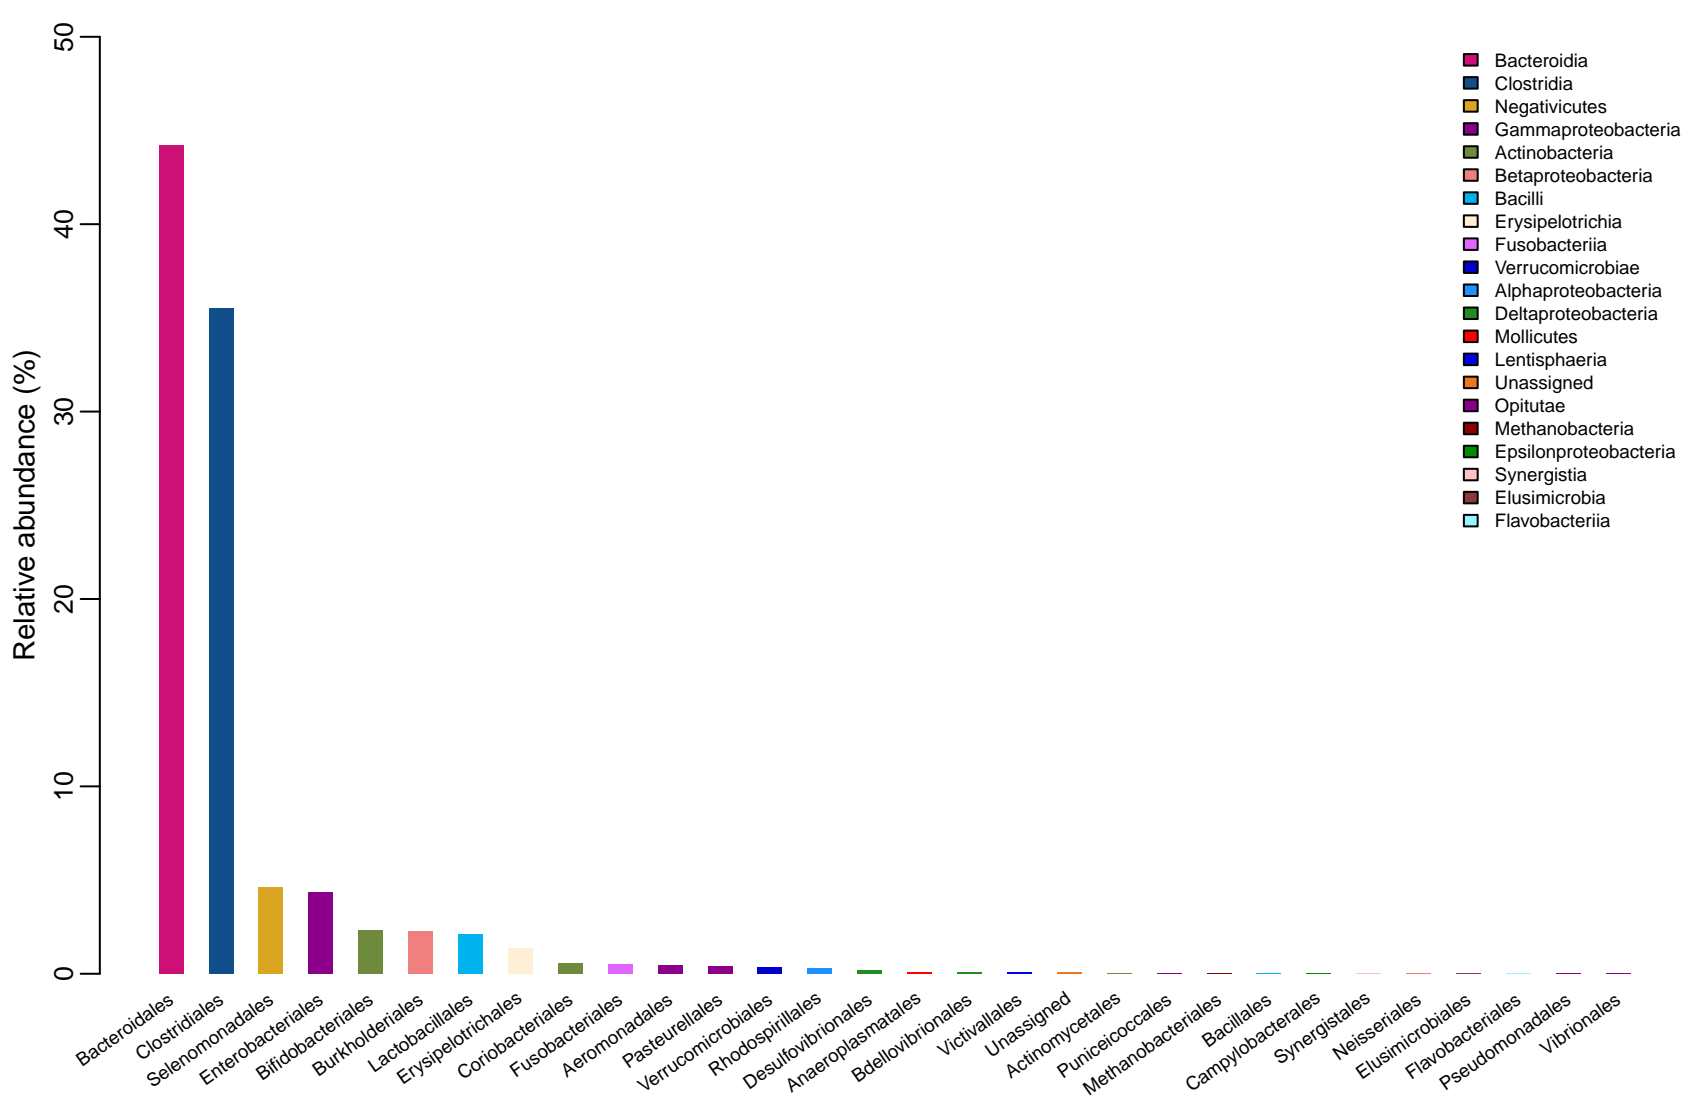

Supplement: data.zip [file data.zip]

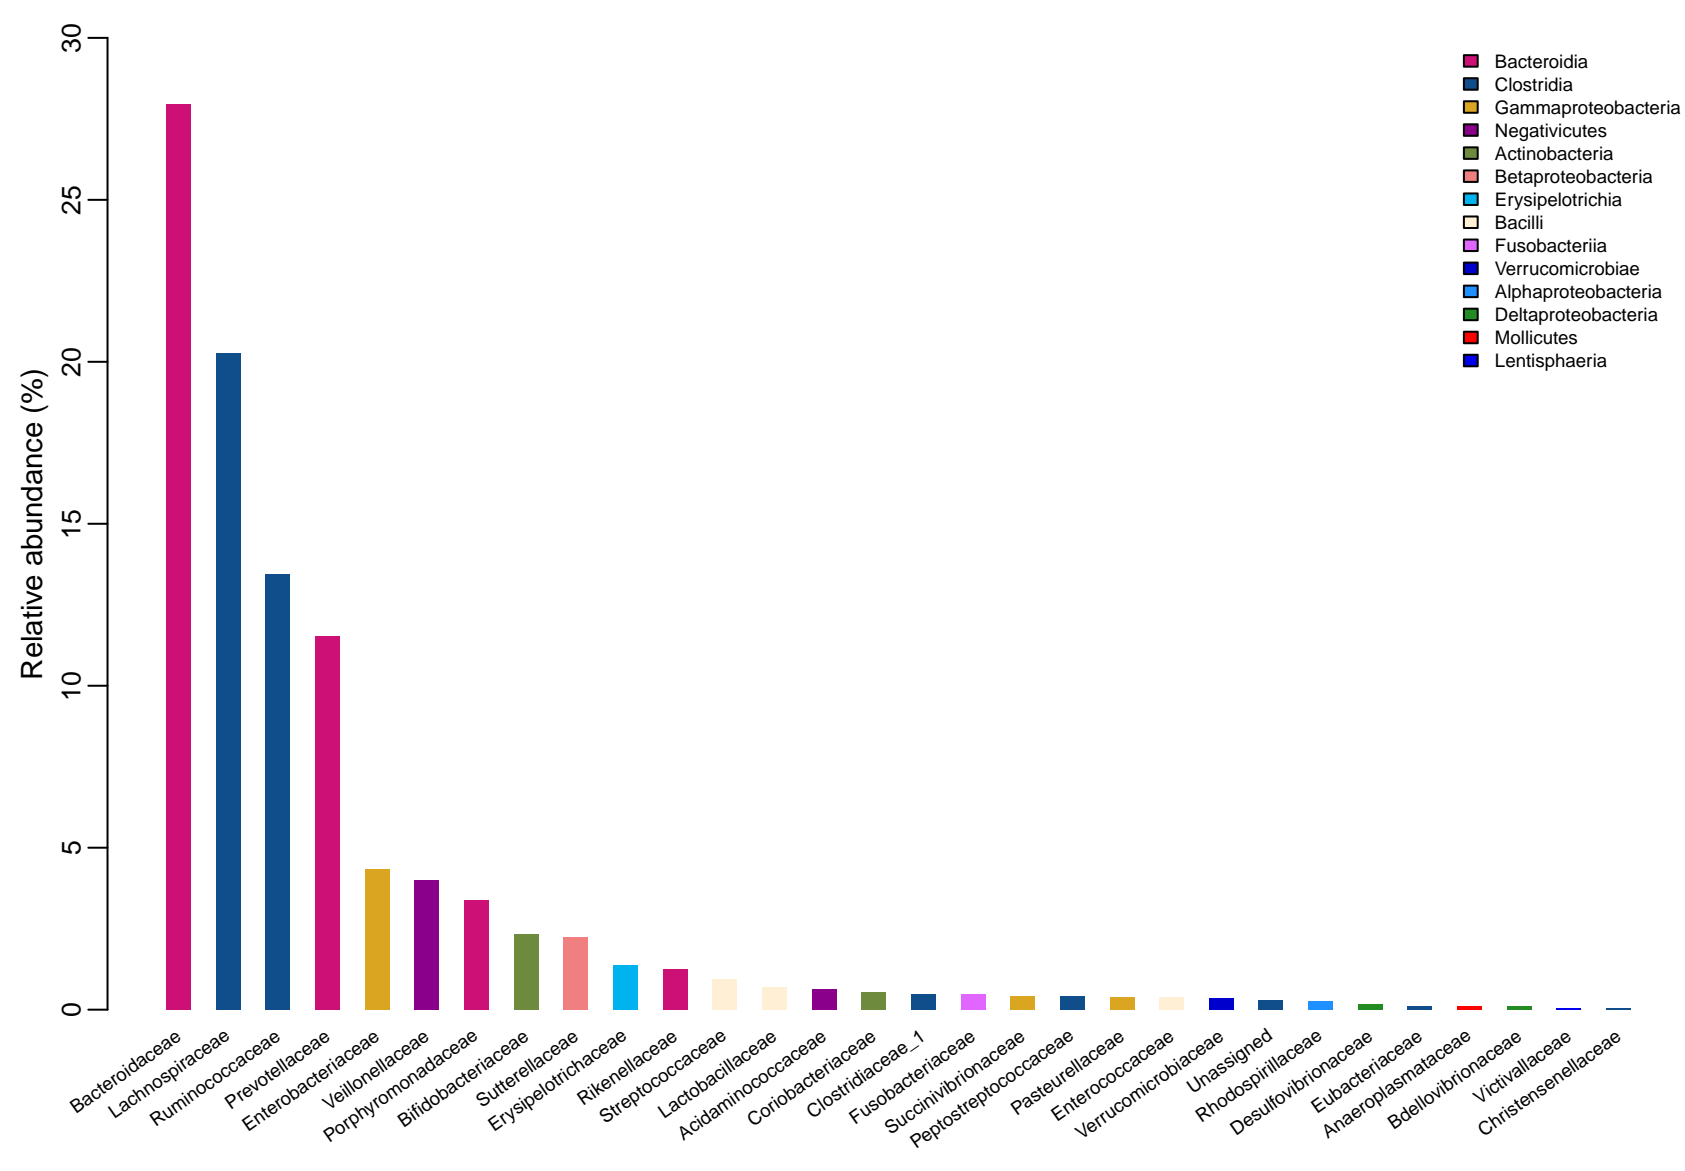

Supplement: data.zip [file data.zip]

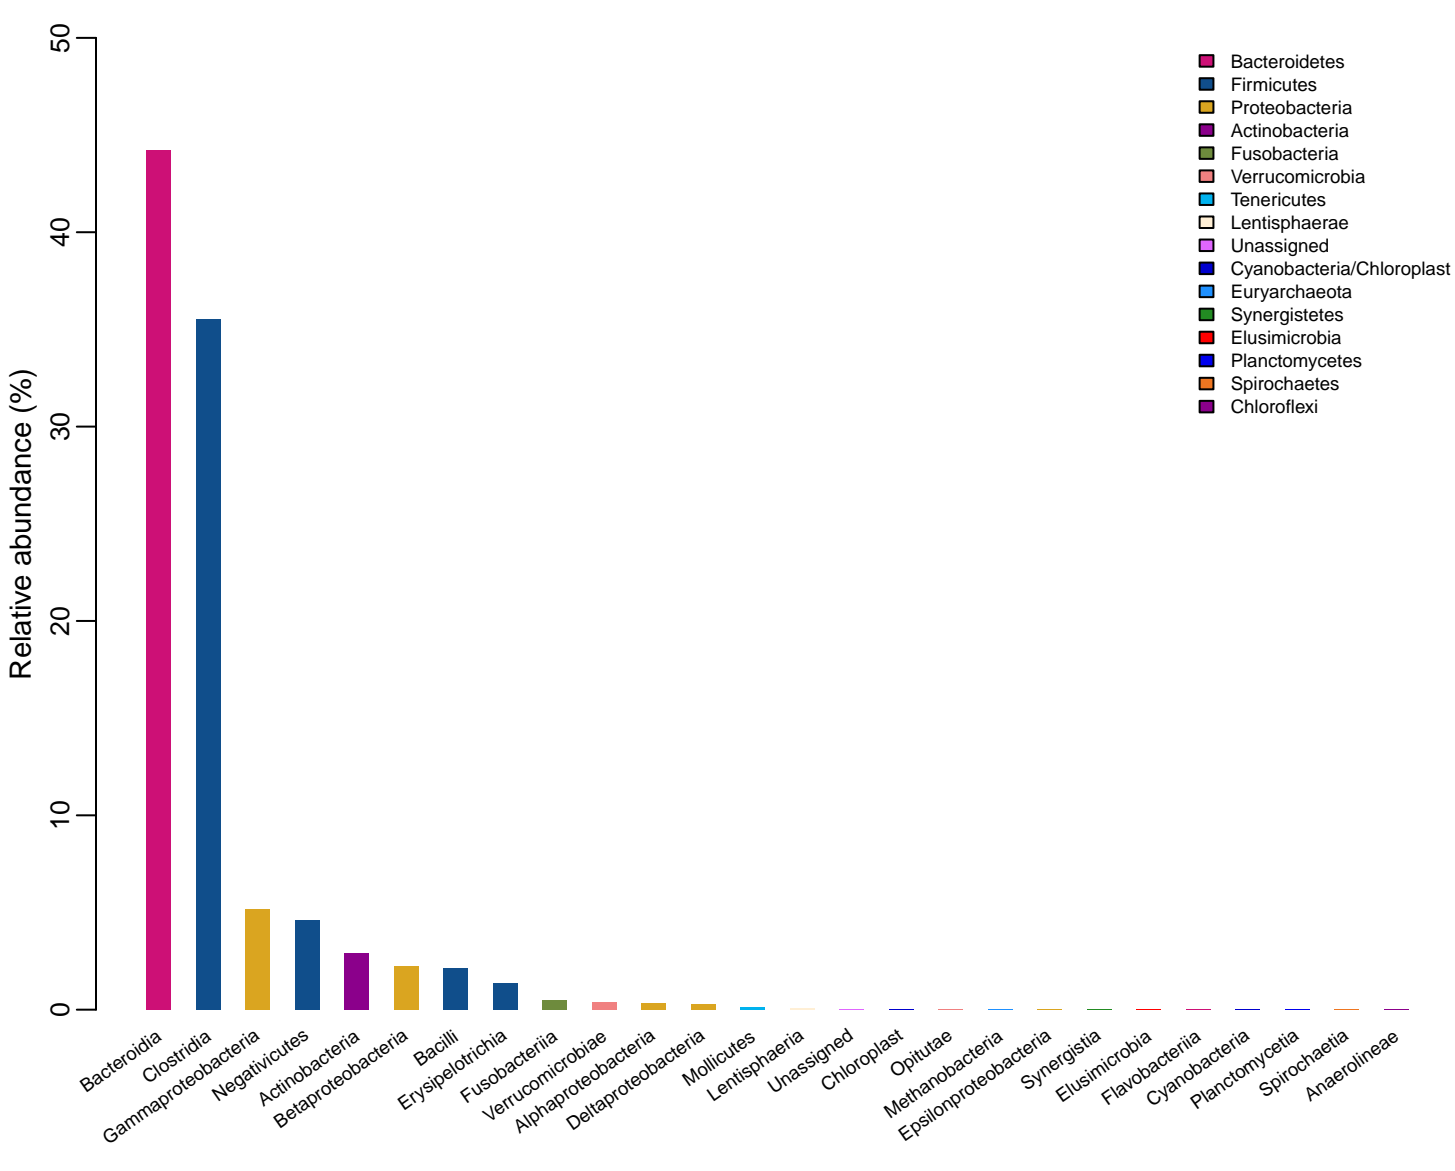

Supplement: data.zip [file data.zip]

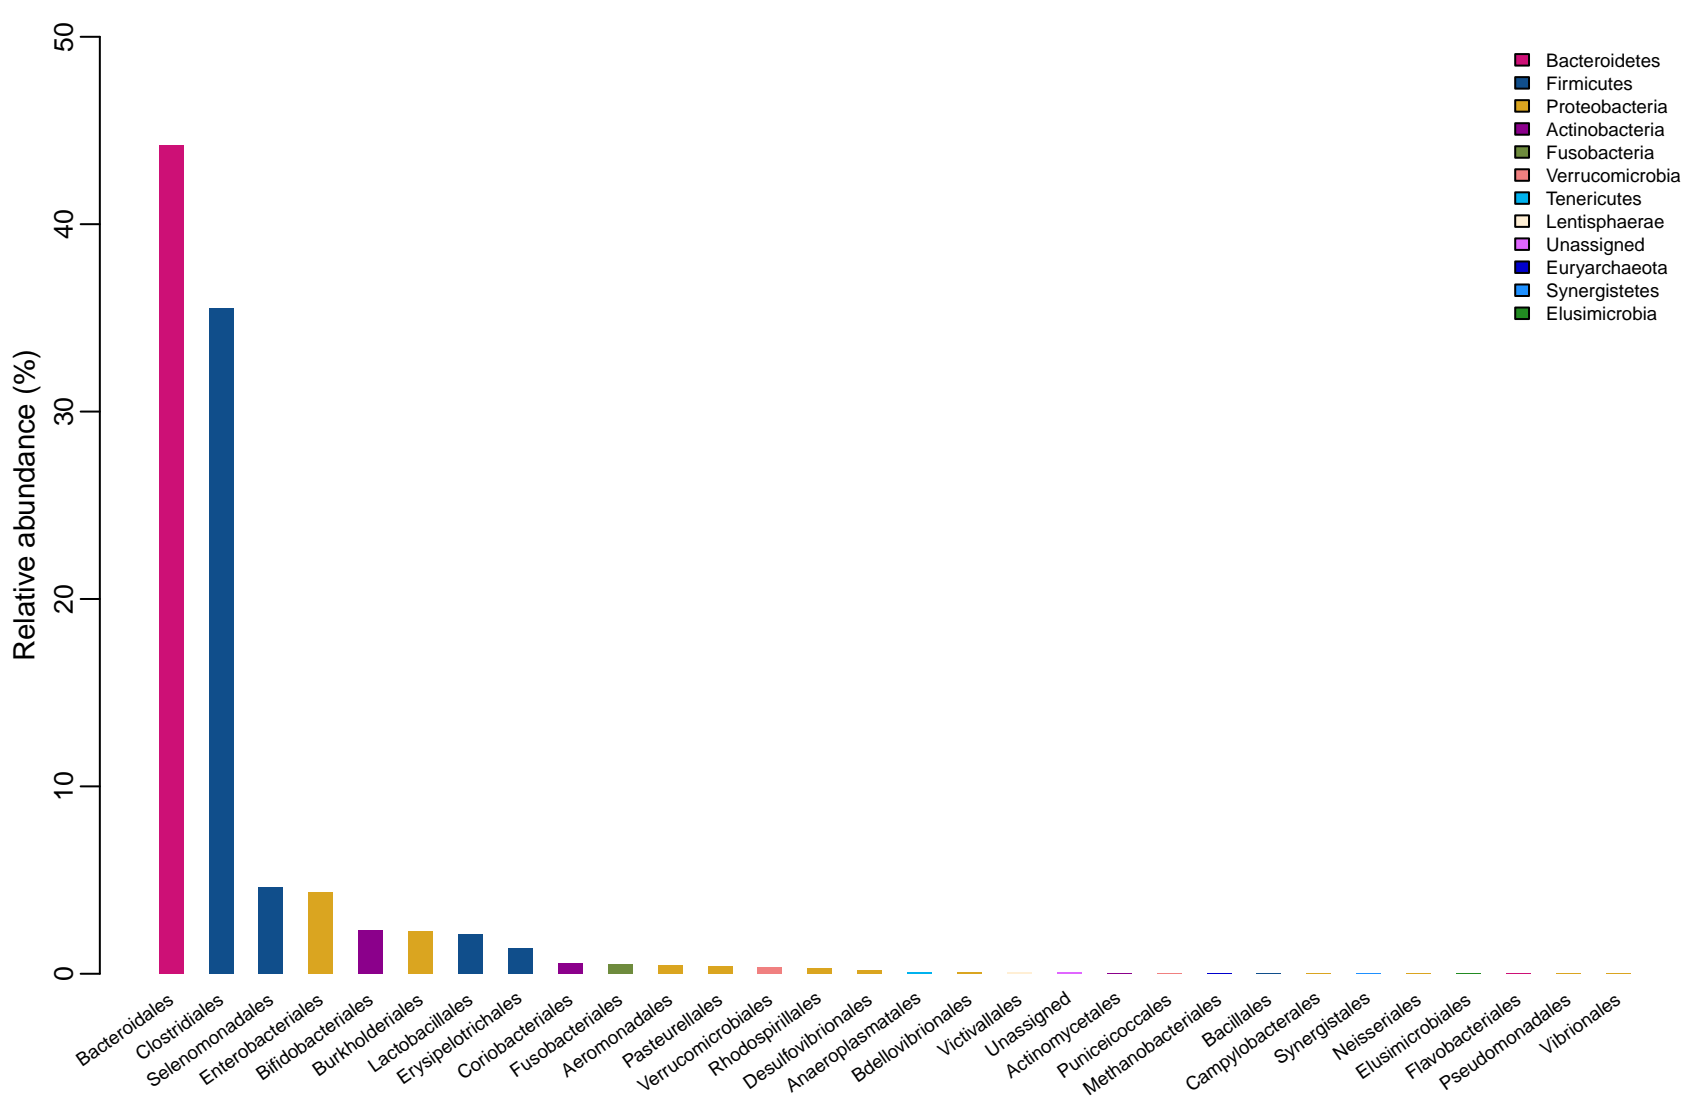

Supplement: data.zip [file data.zip]

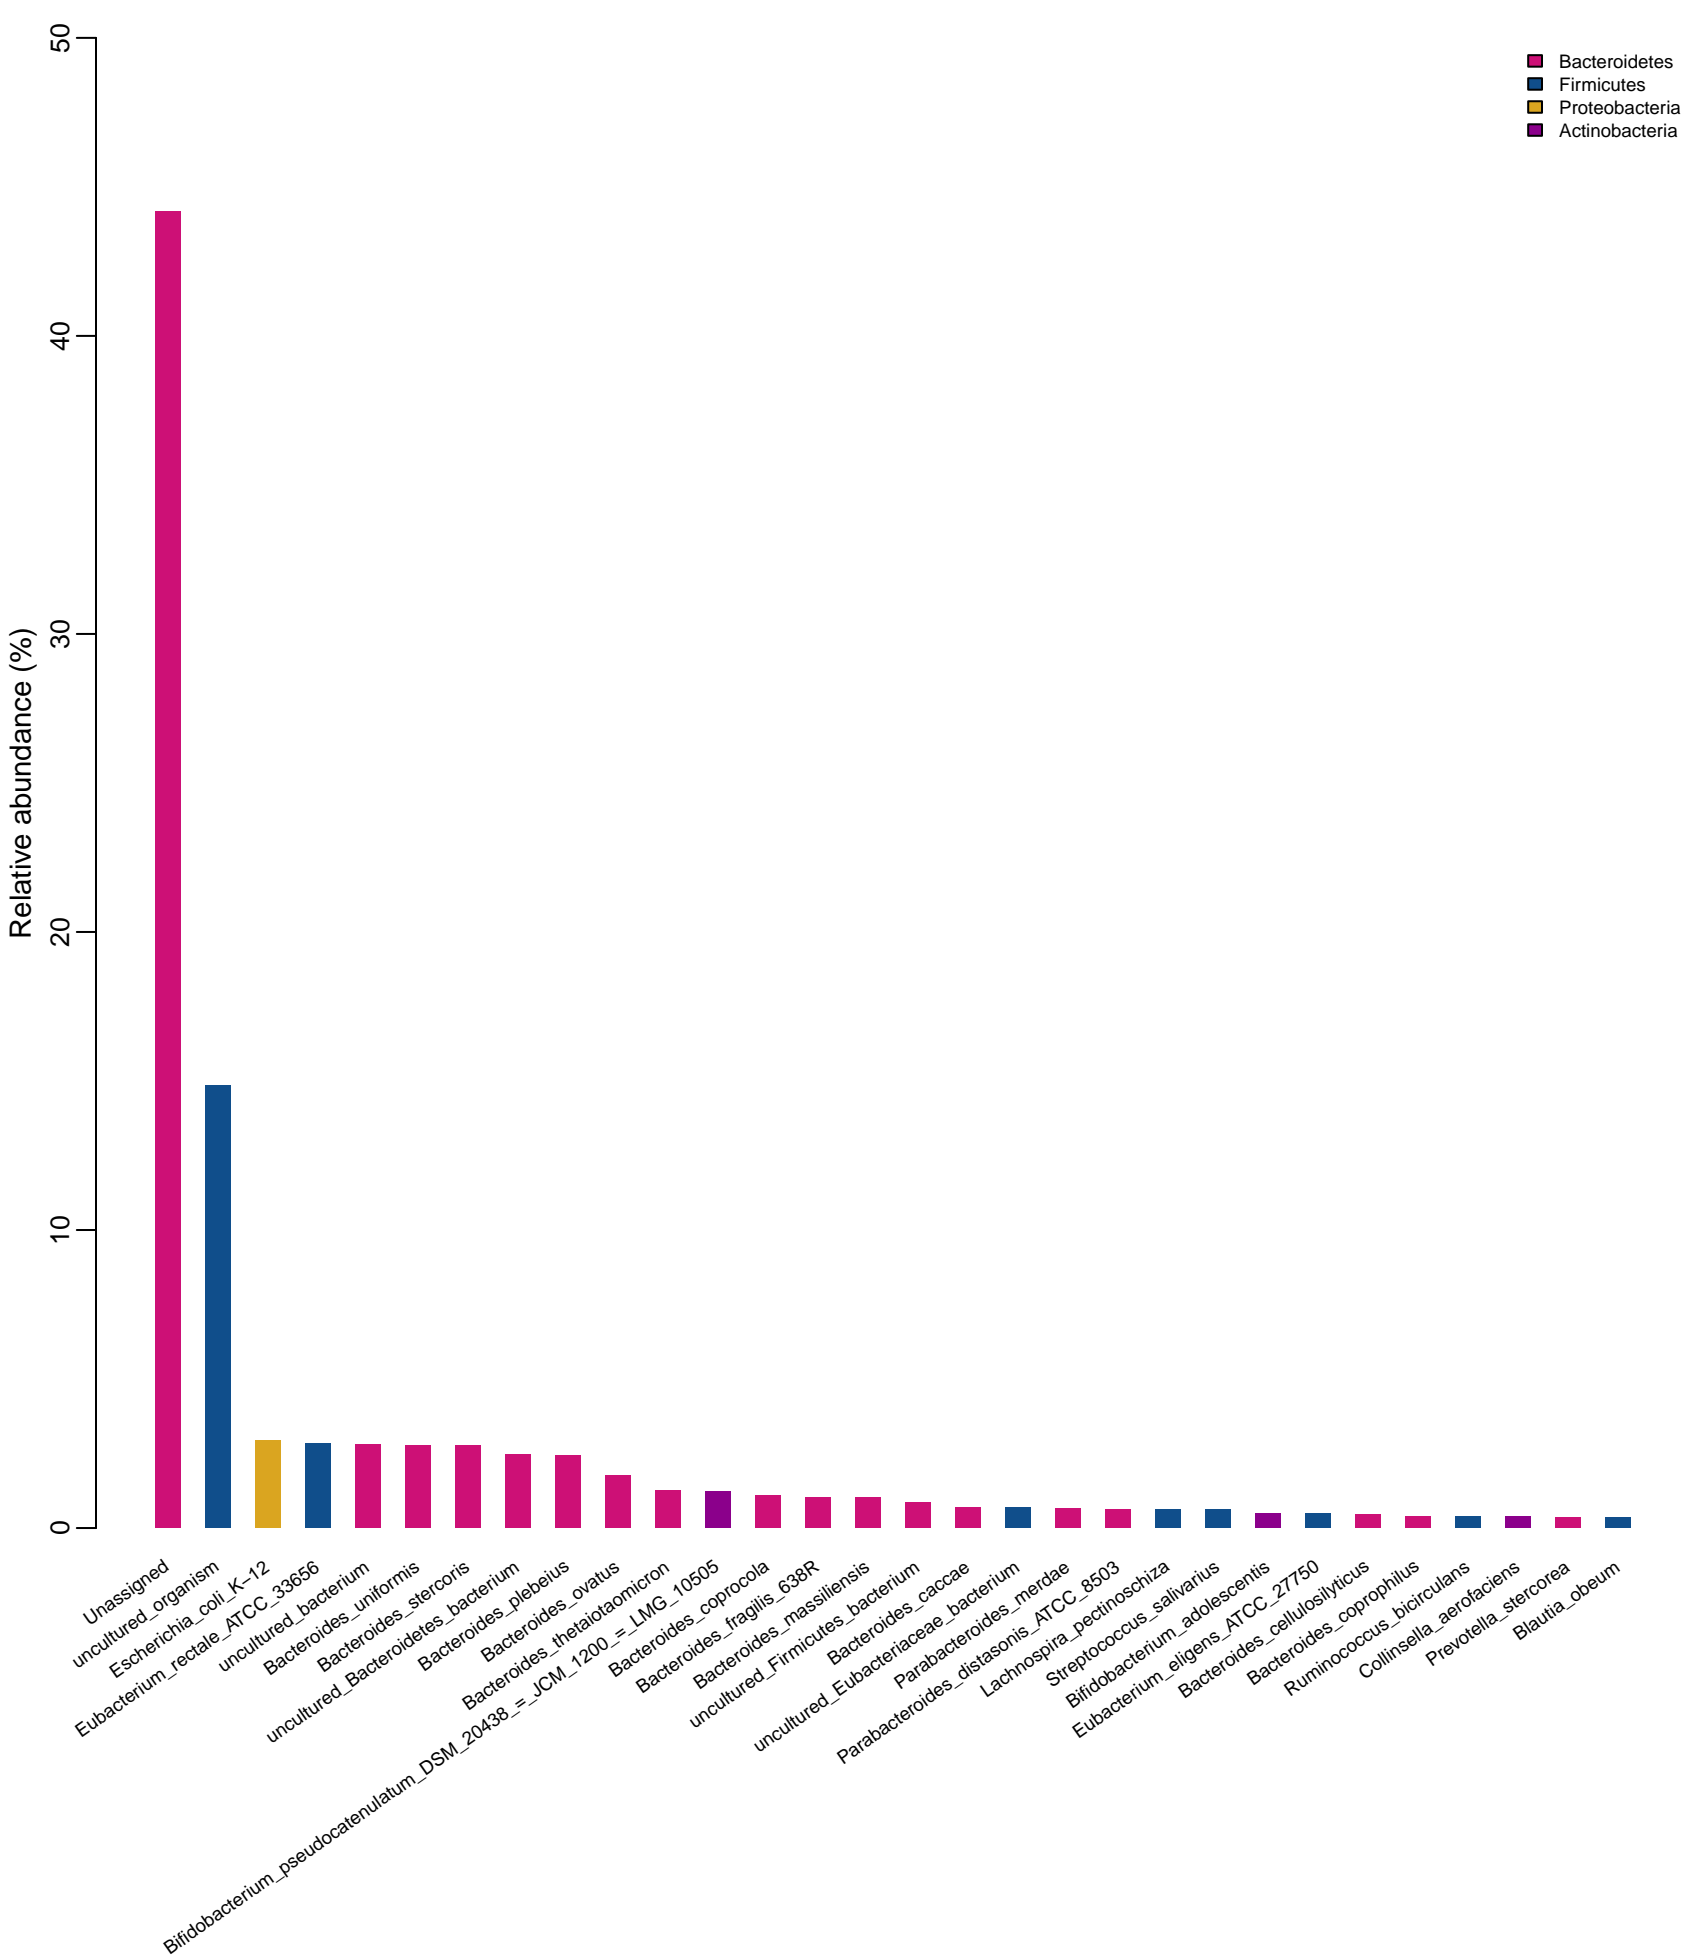

Supplement: data.zip [file data.zip]

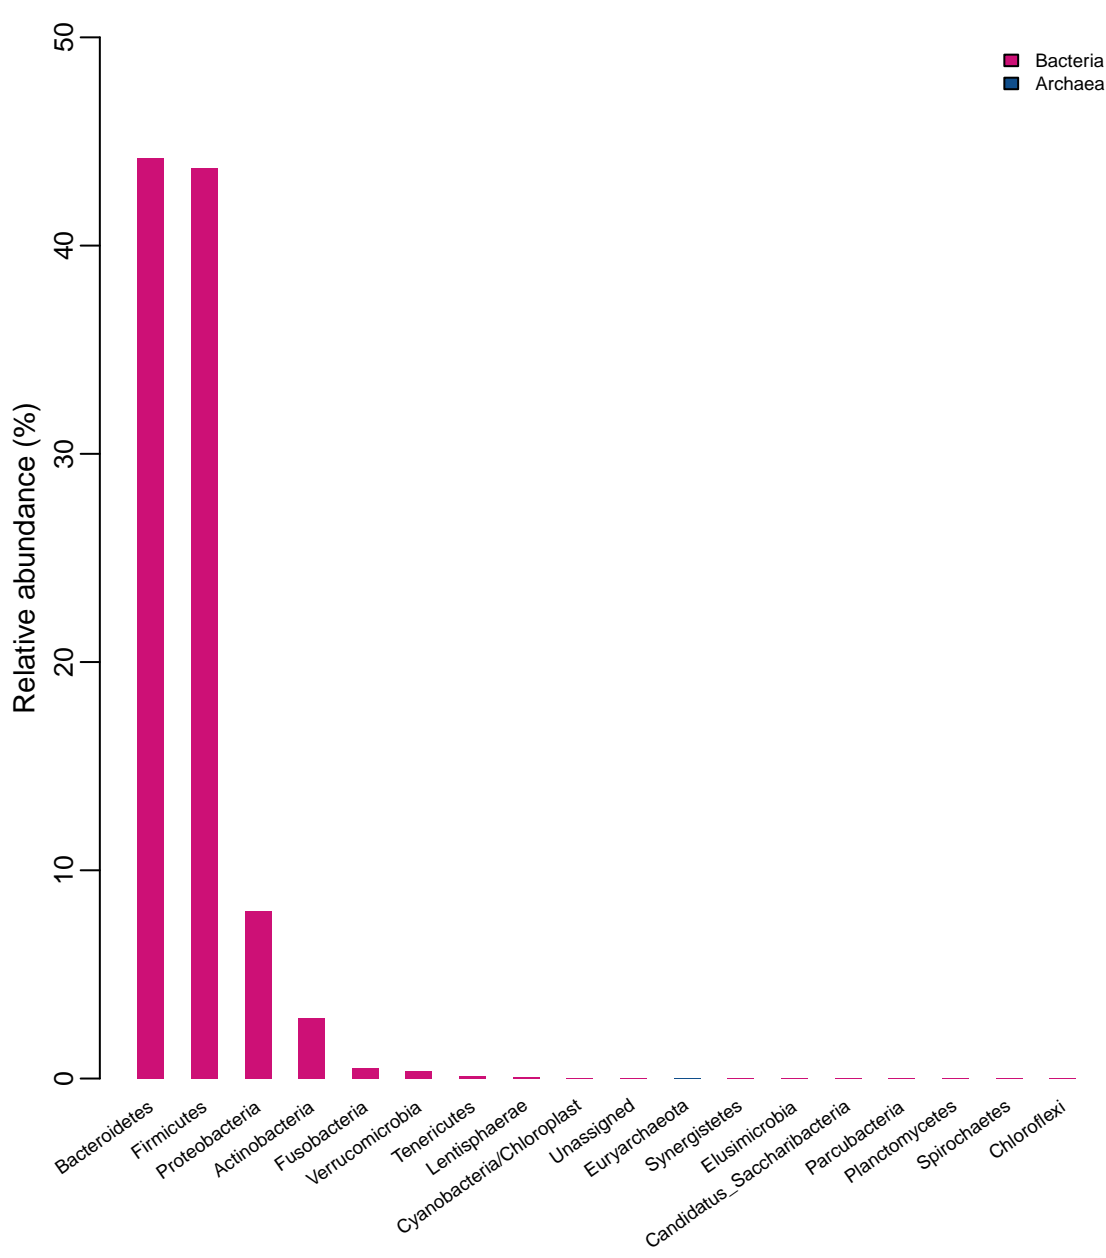

Supplement: data.zip [file data.zip]

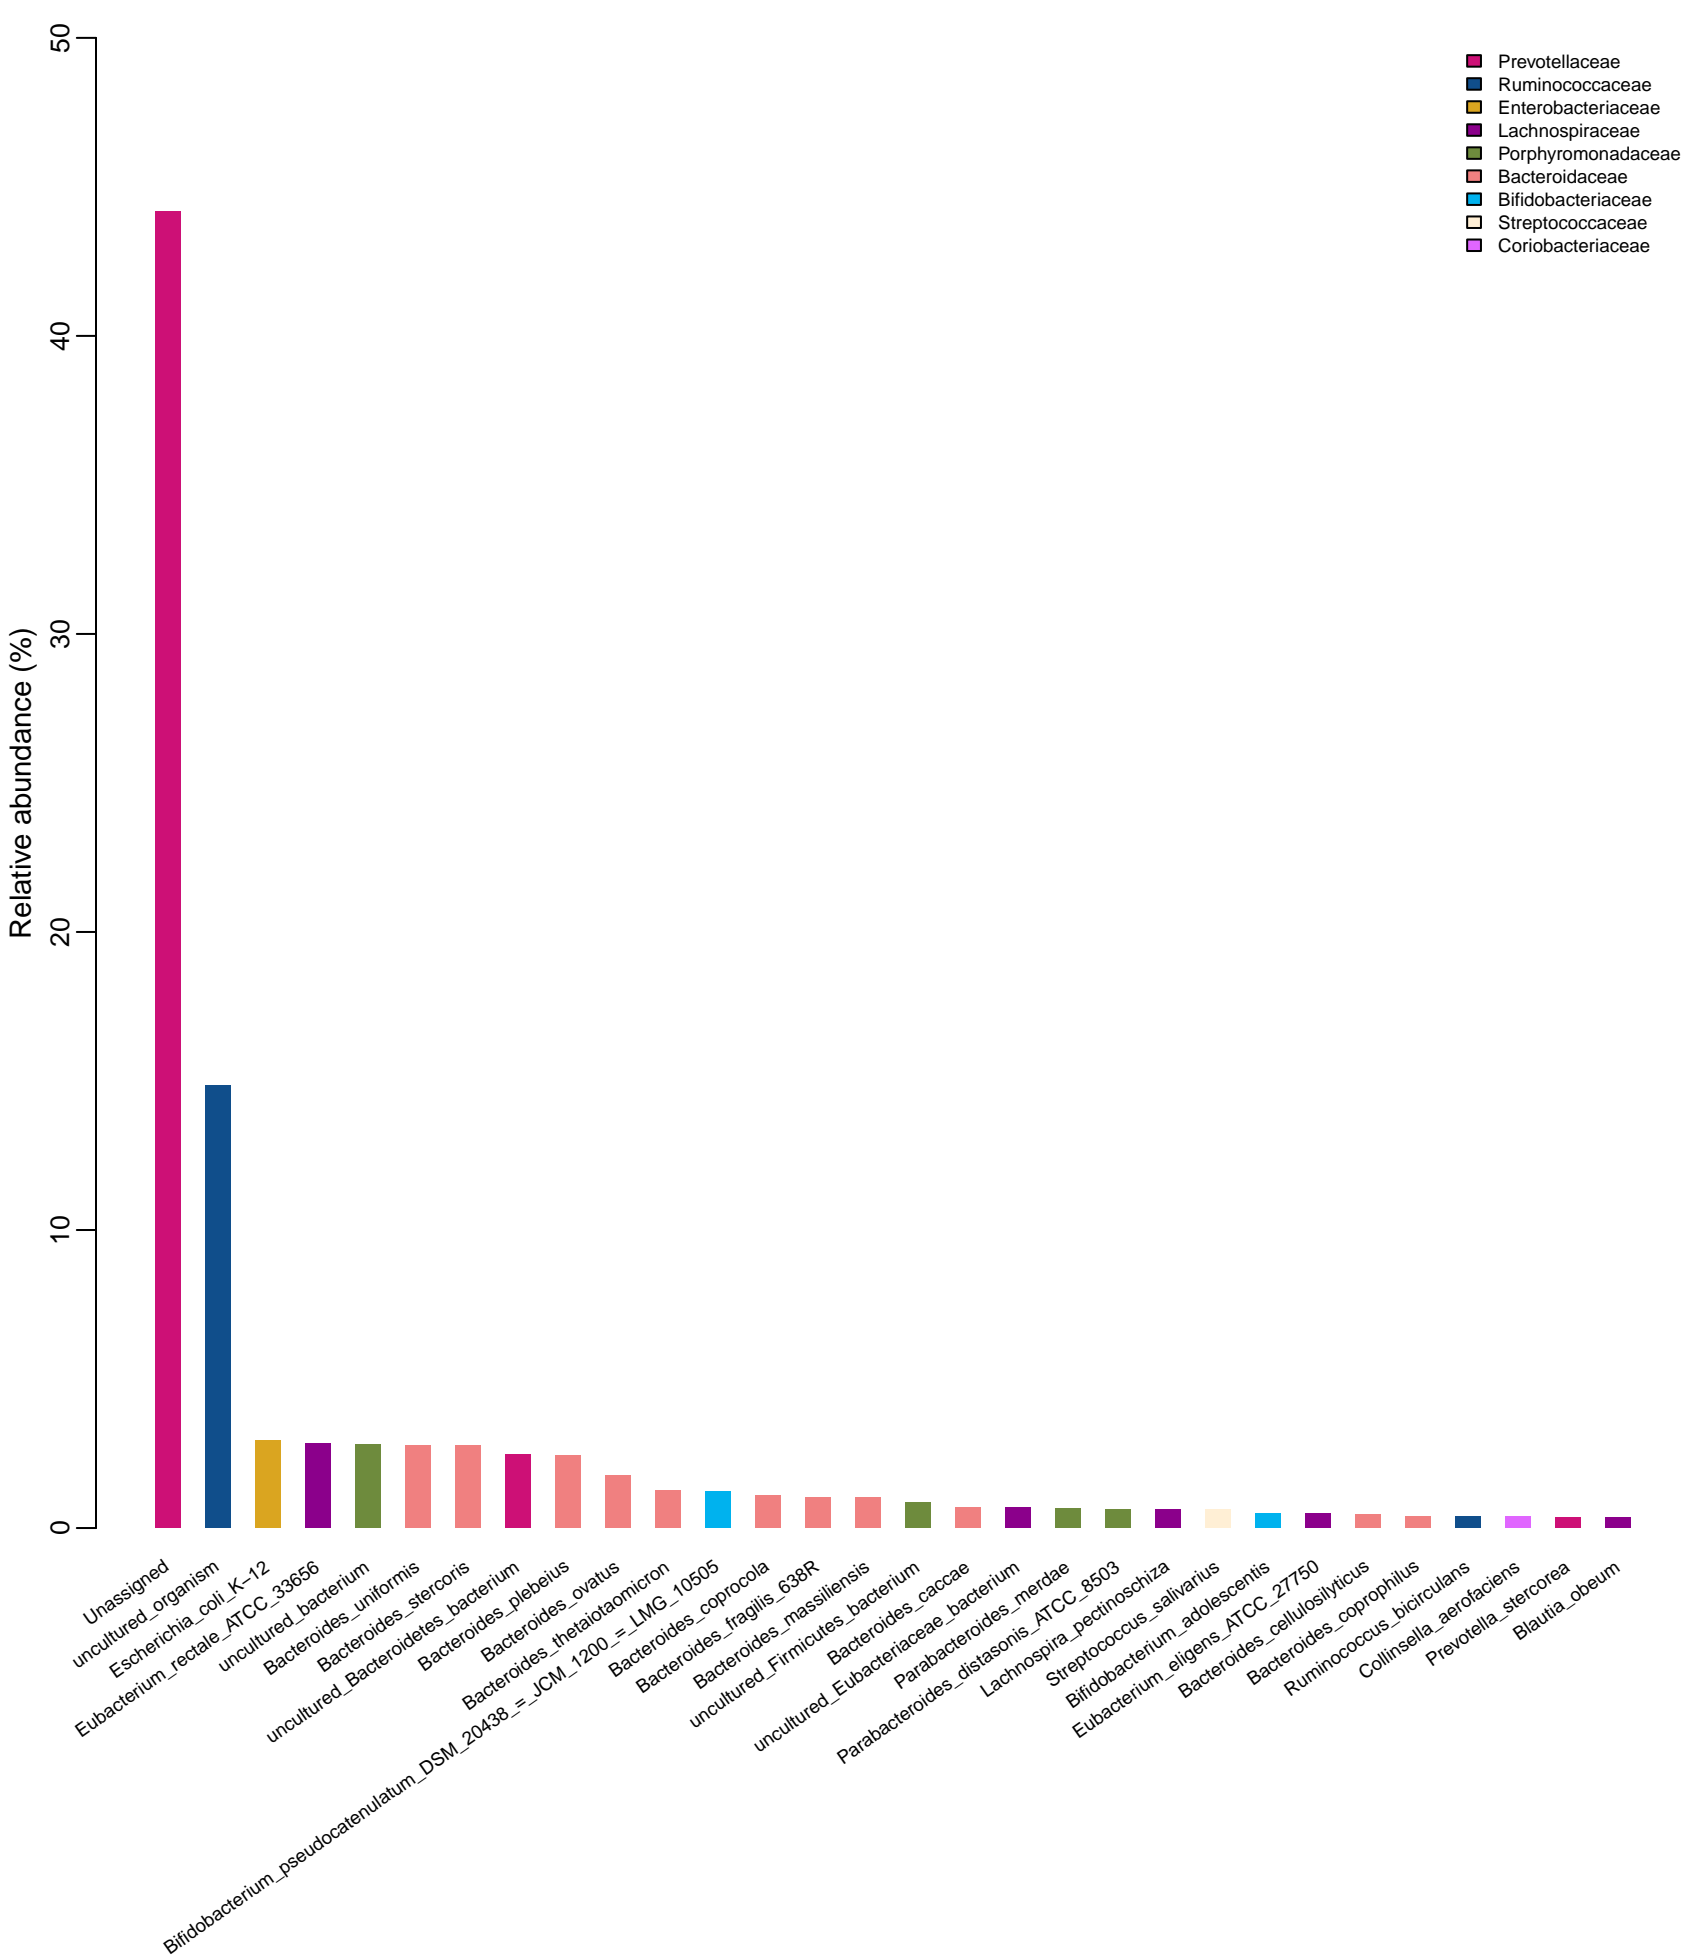

Supplement: data.zip [file data.zip]

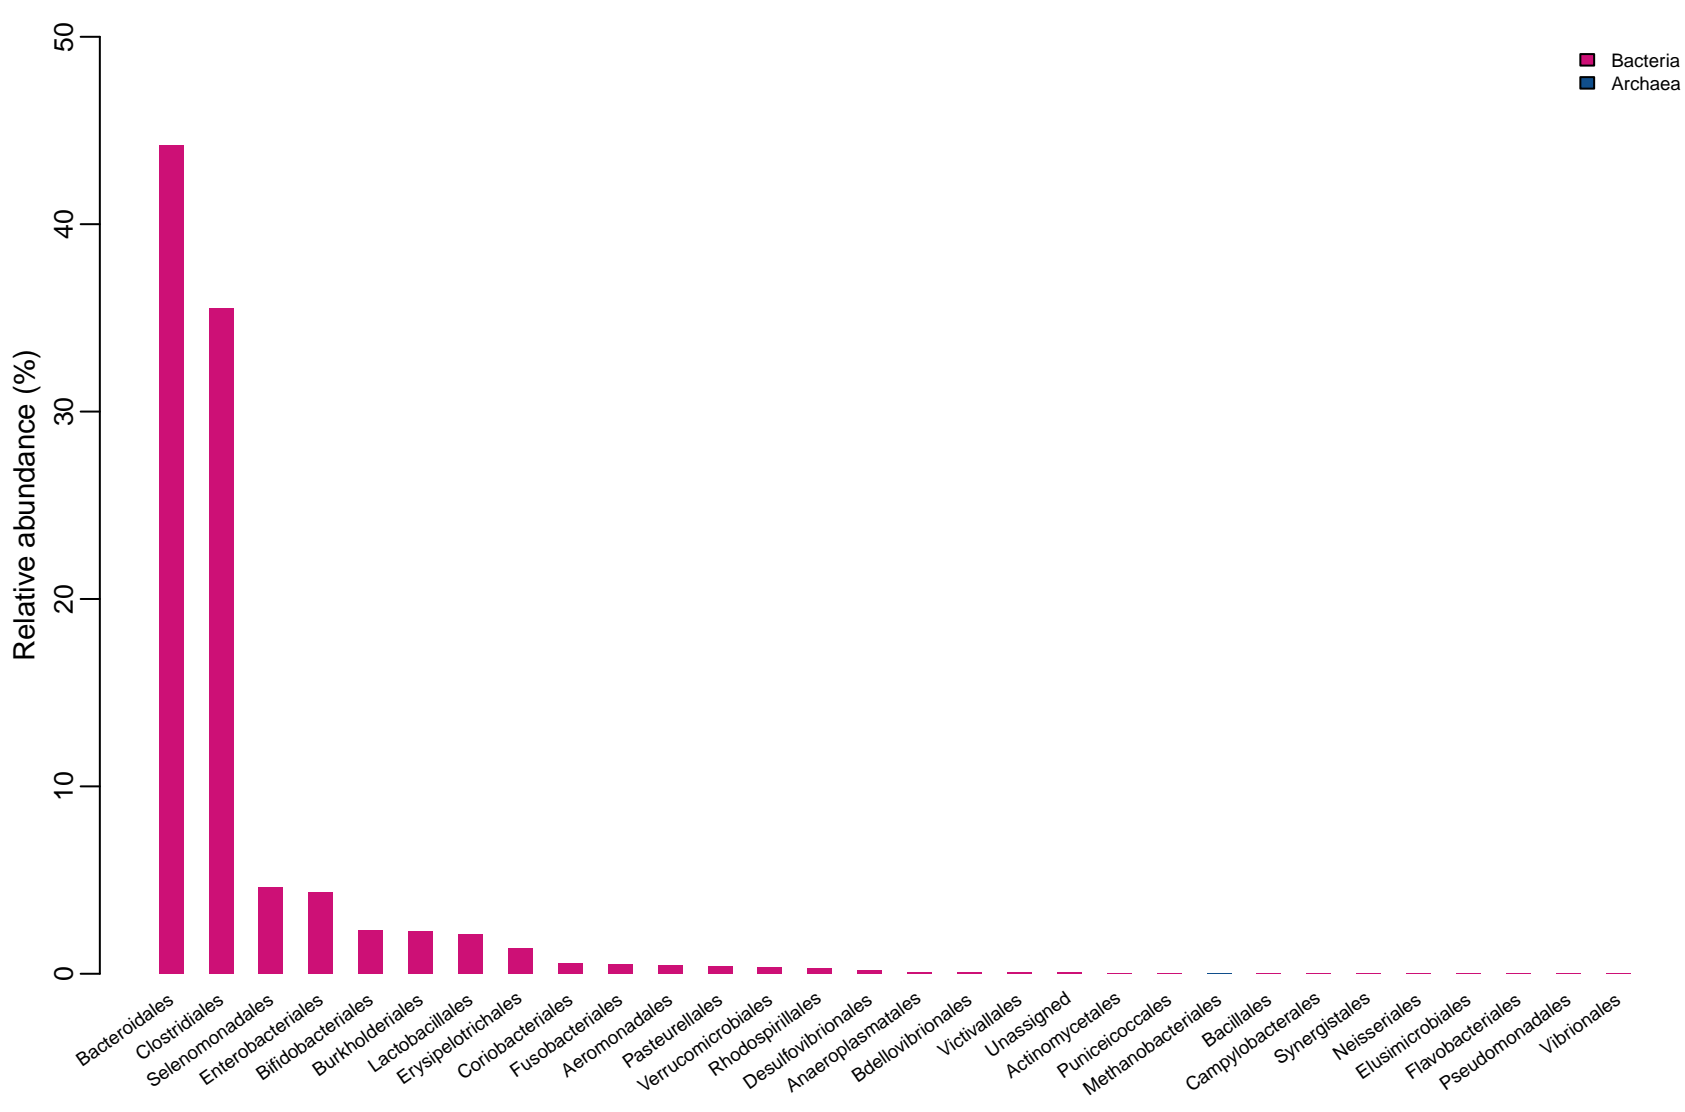

Supplement: data.zip [file data.zip]

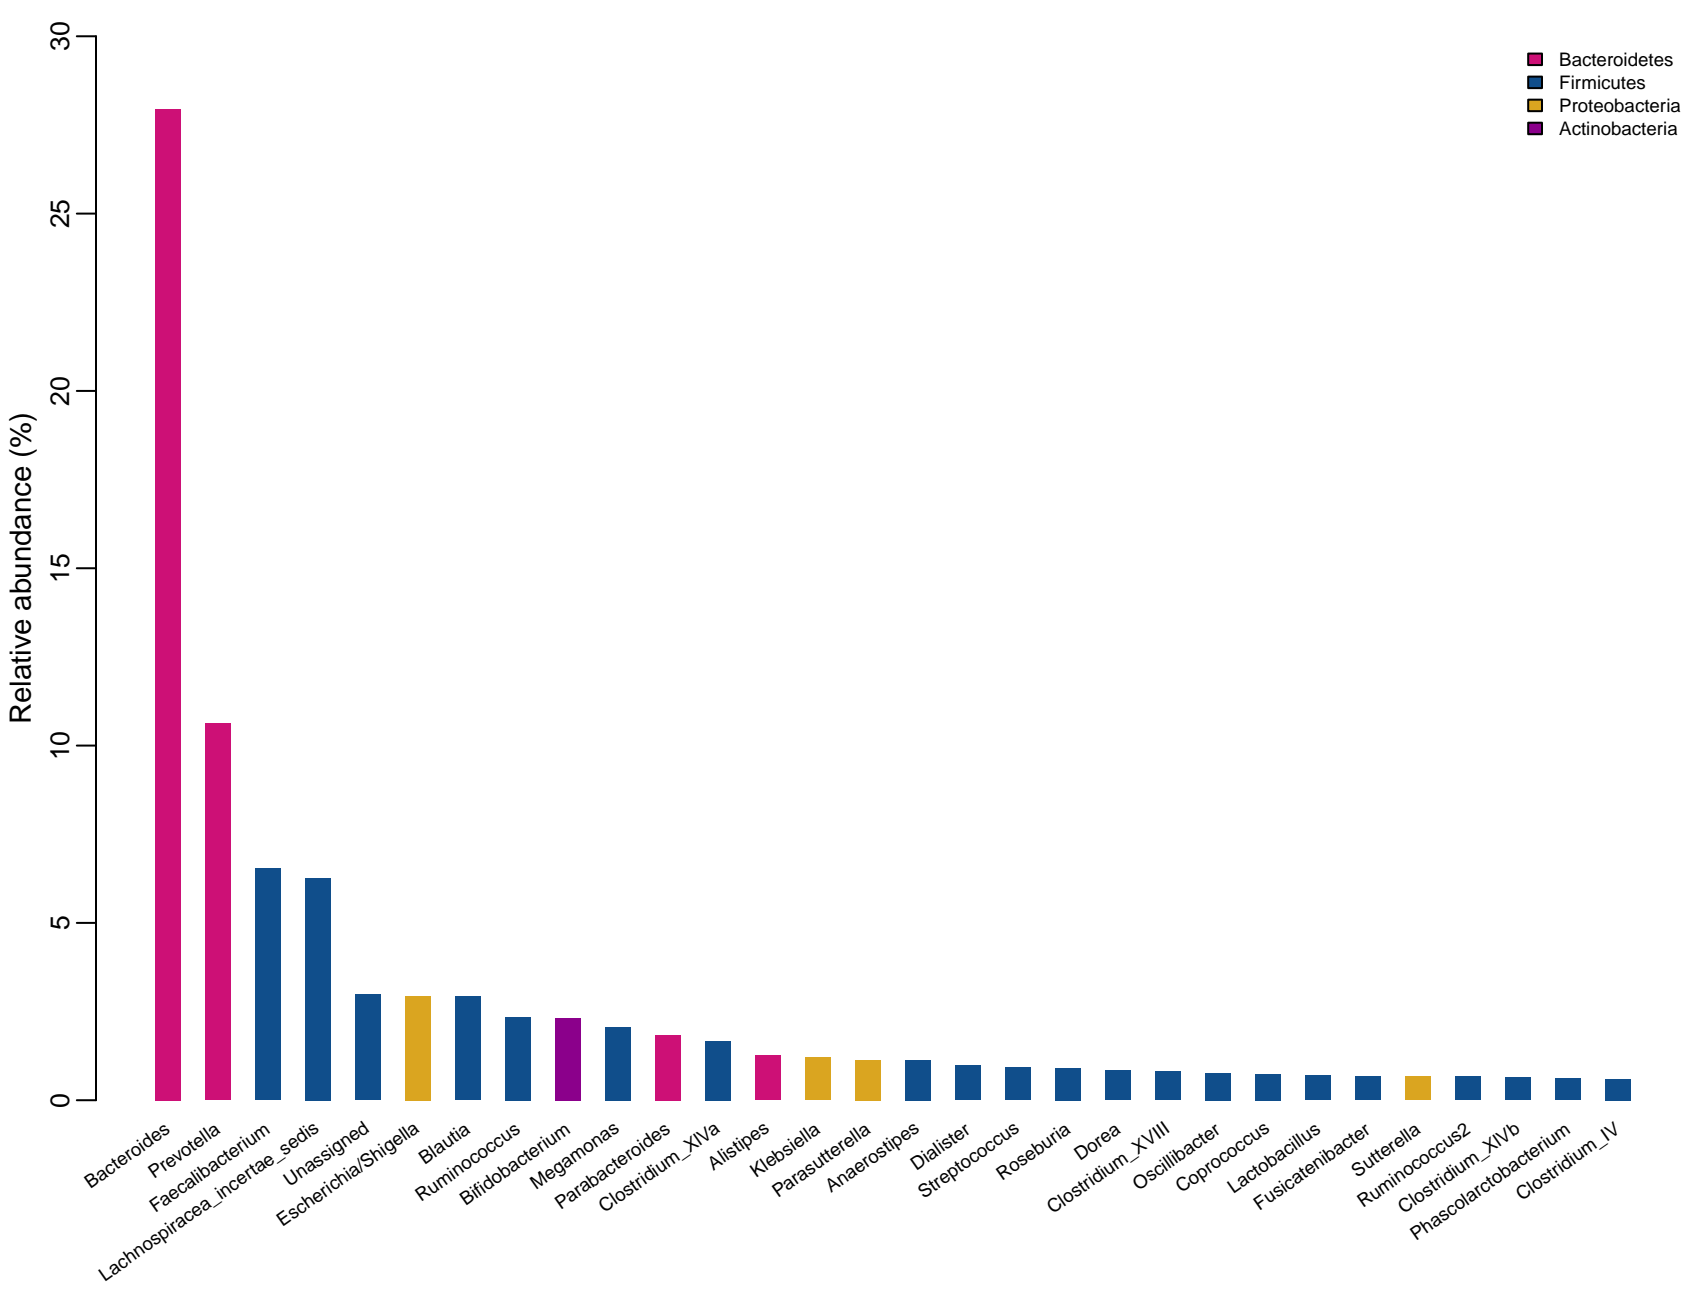

Supplement: data.zip [file data.zip]

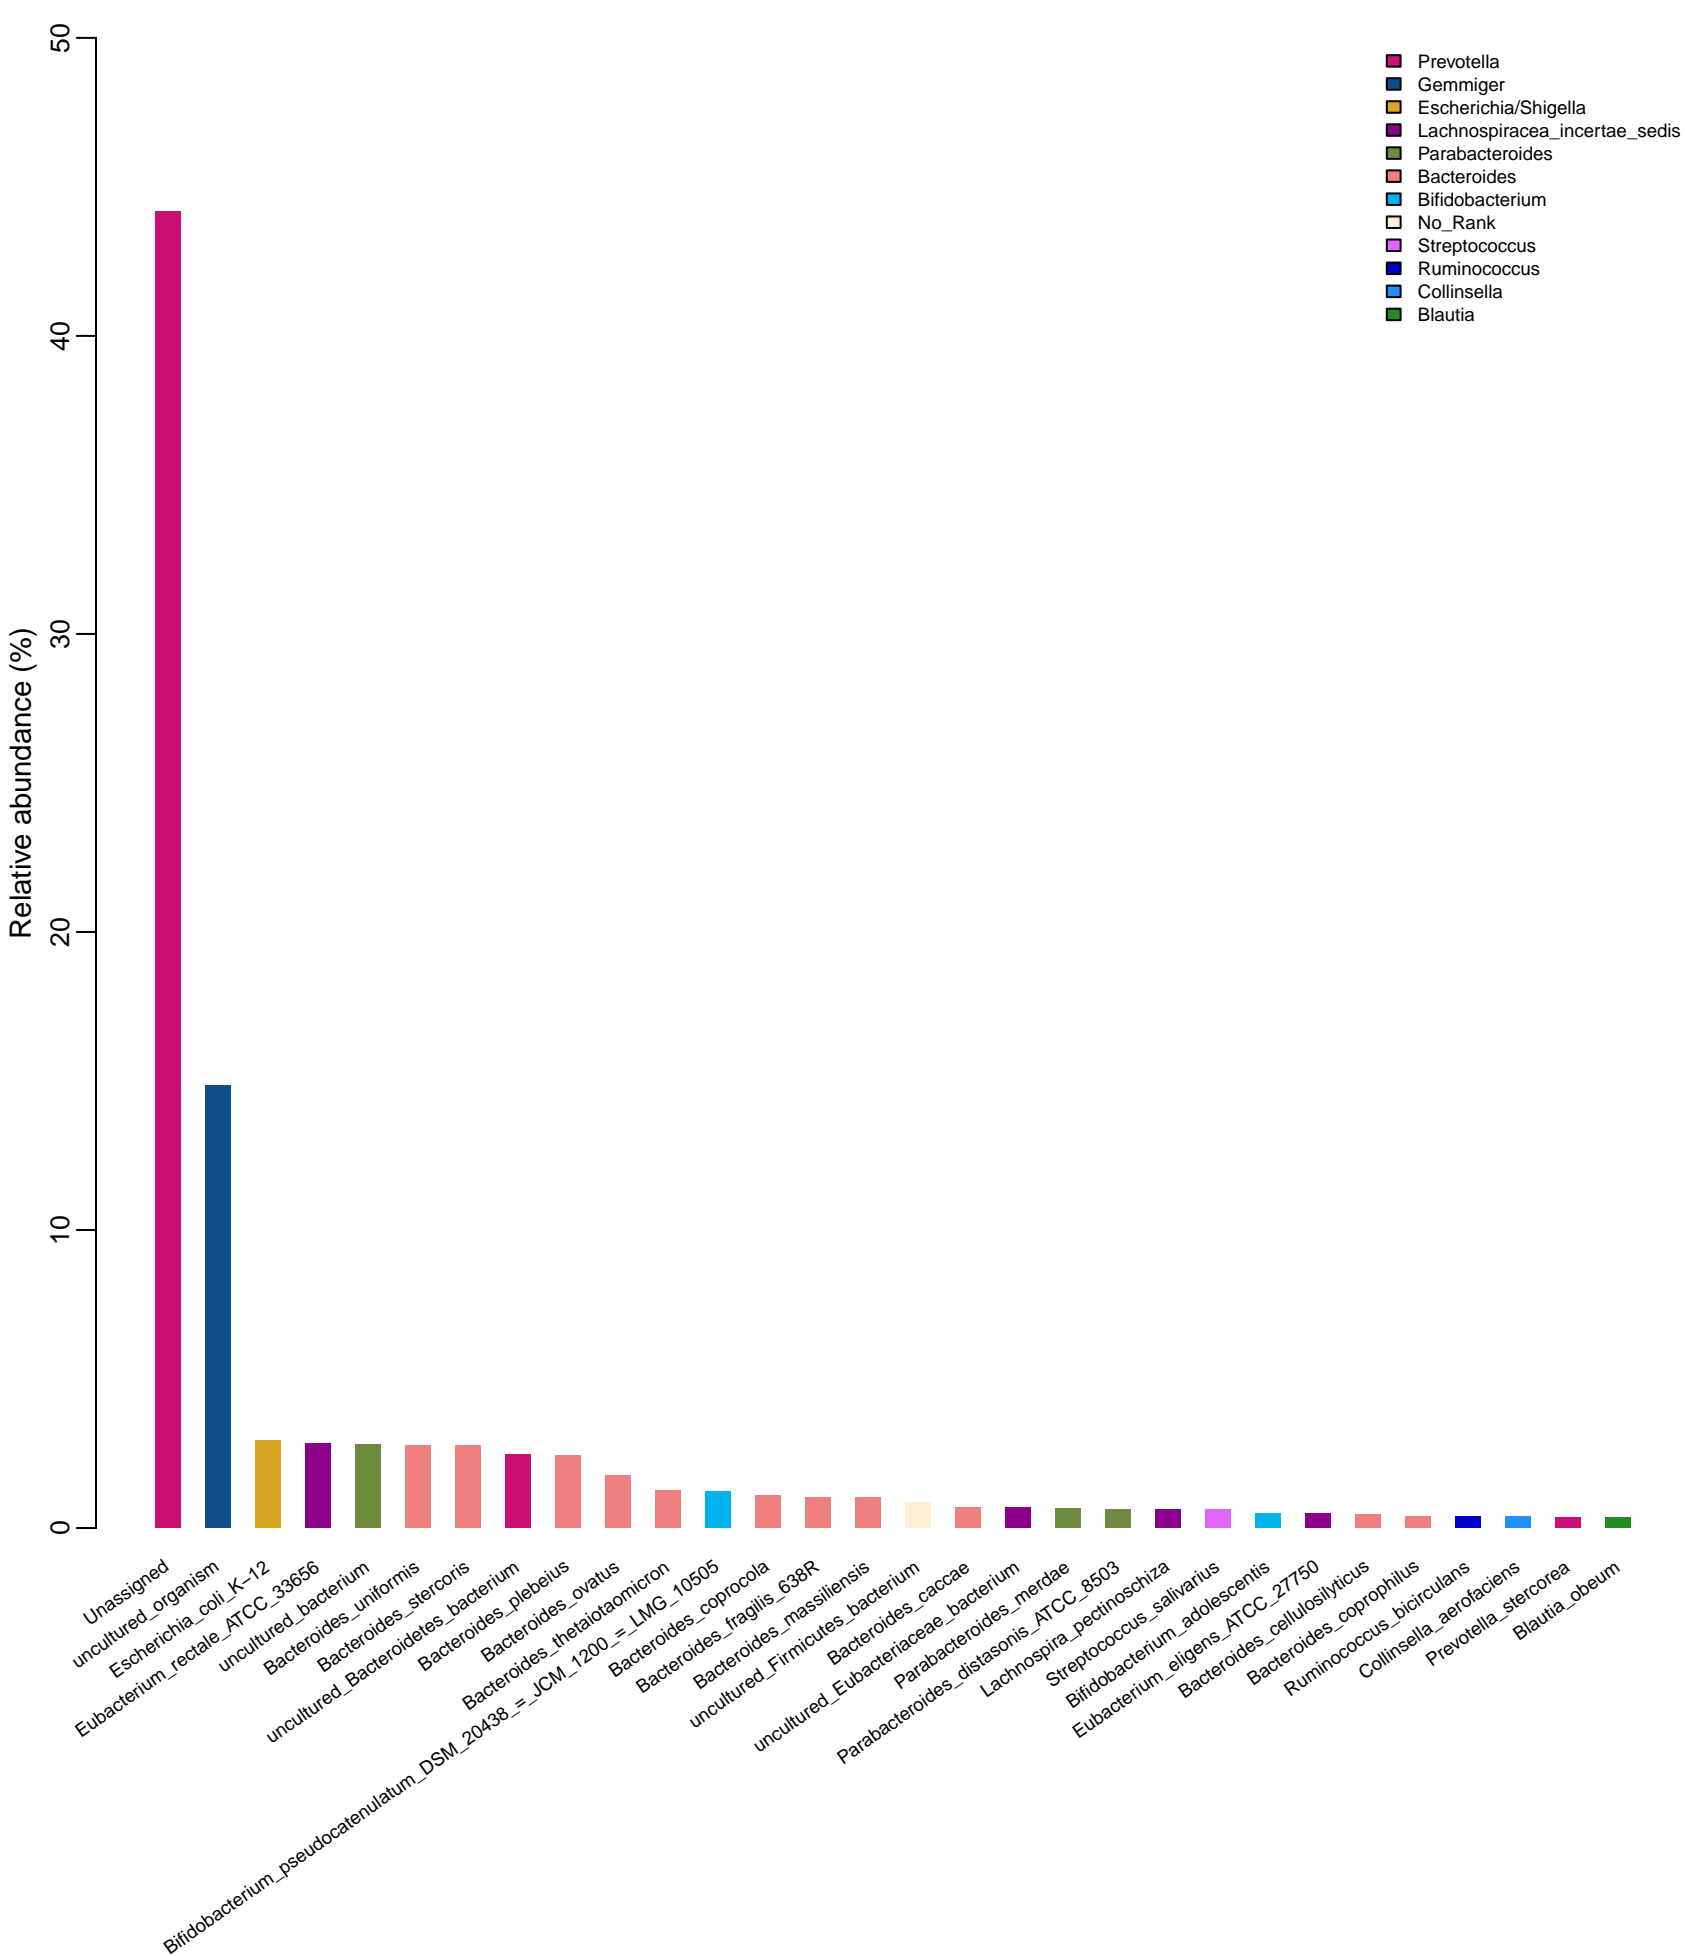

Supplement: data.zip [file data.zip]

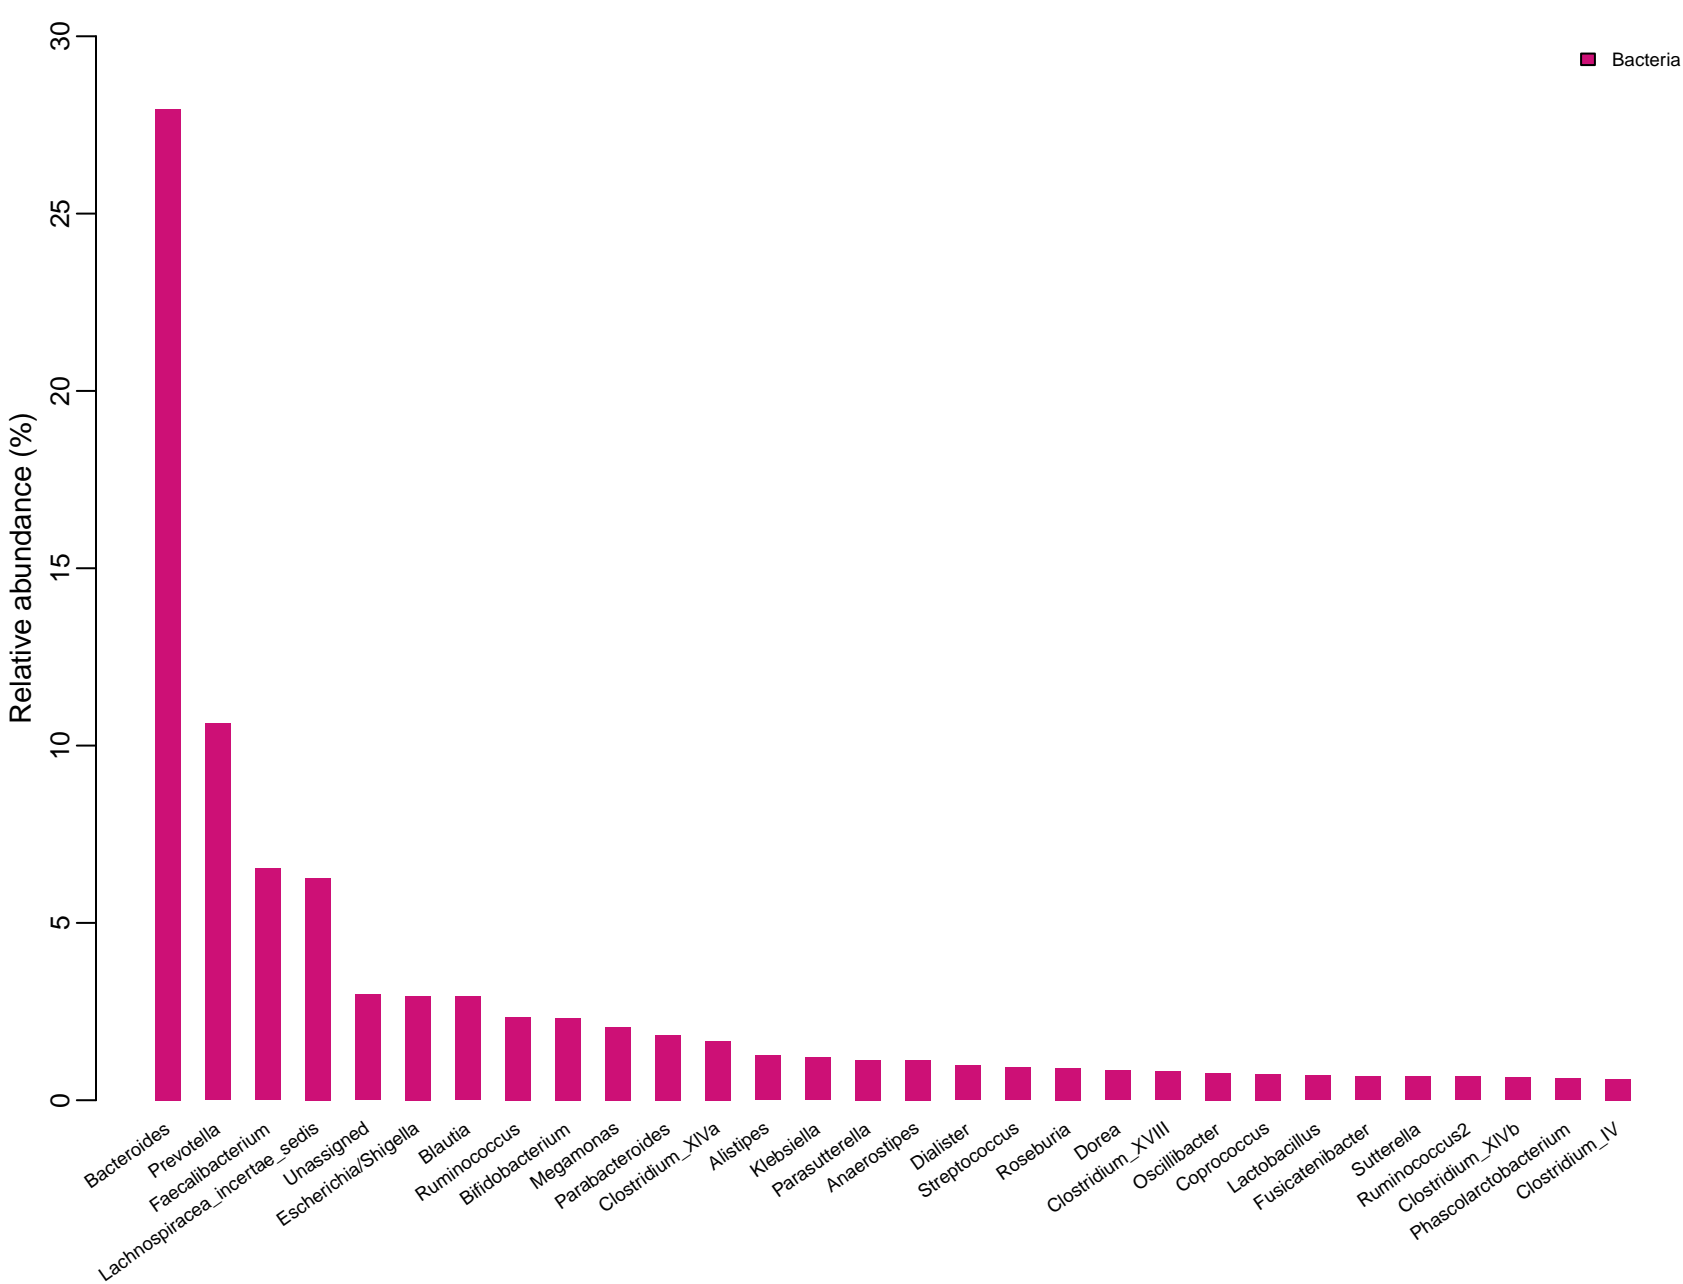

Supplement: data.zip [file data.zip]

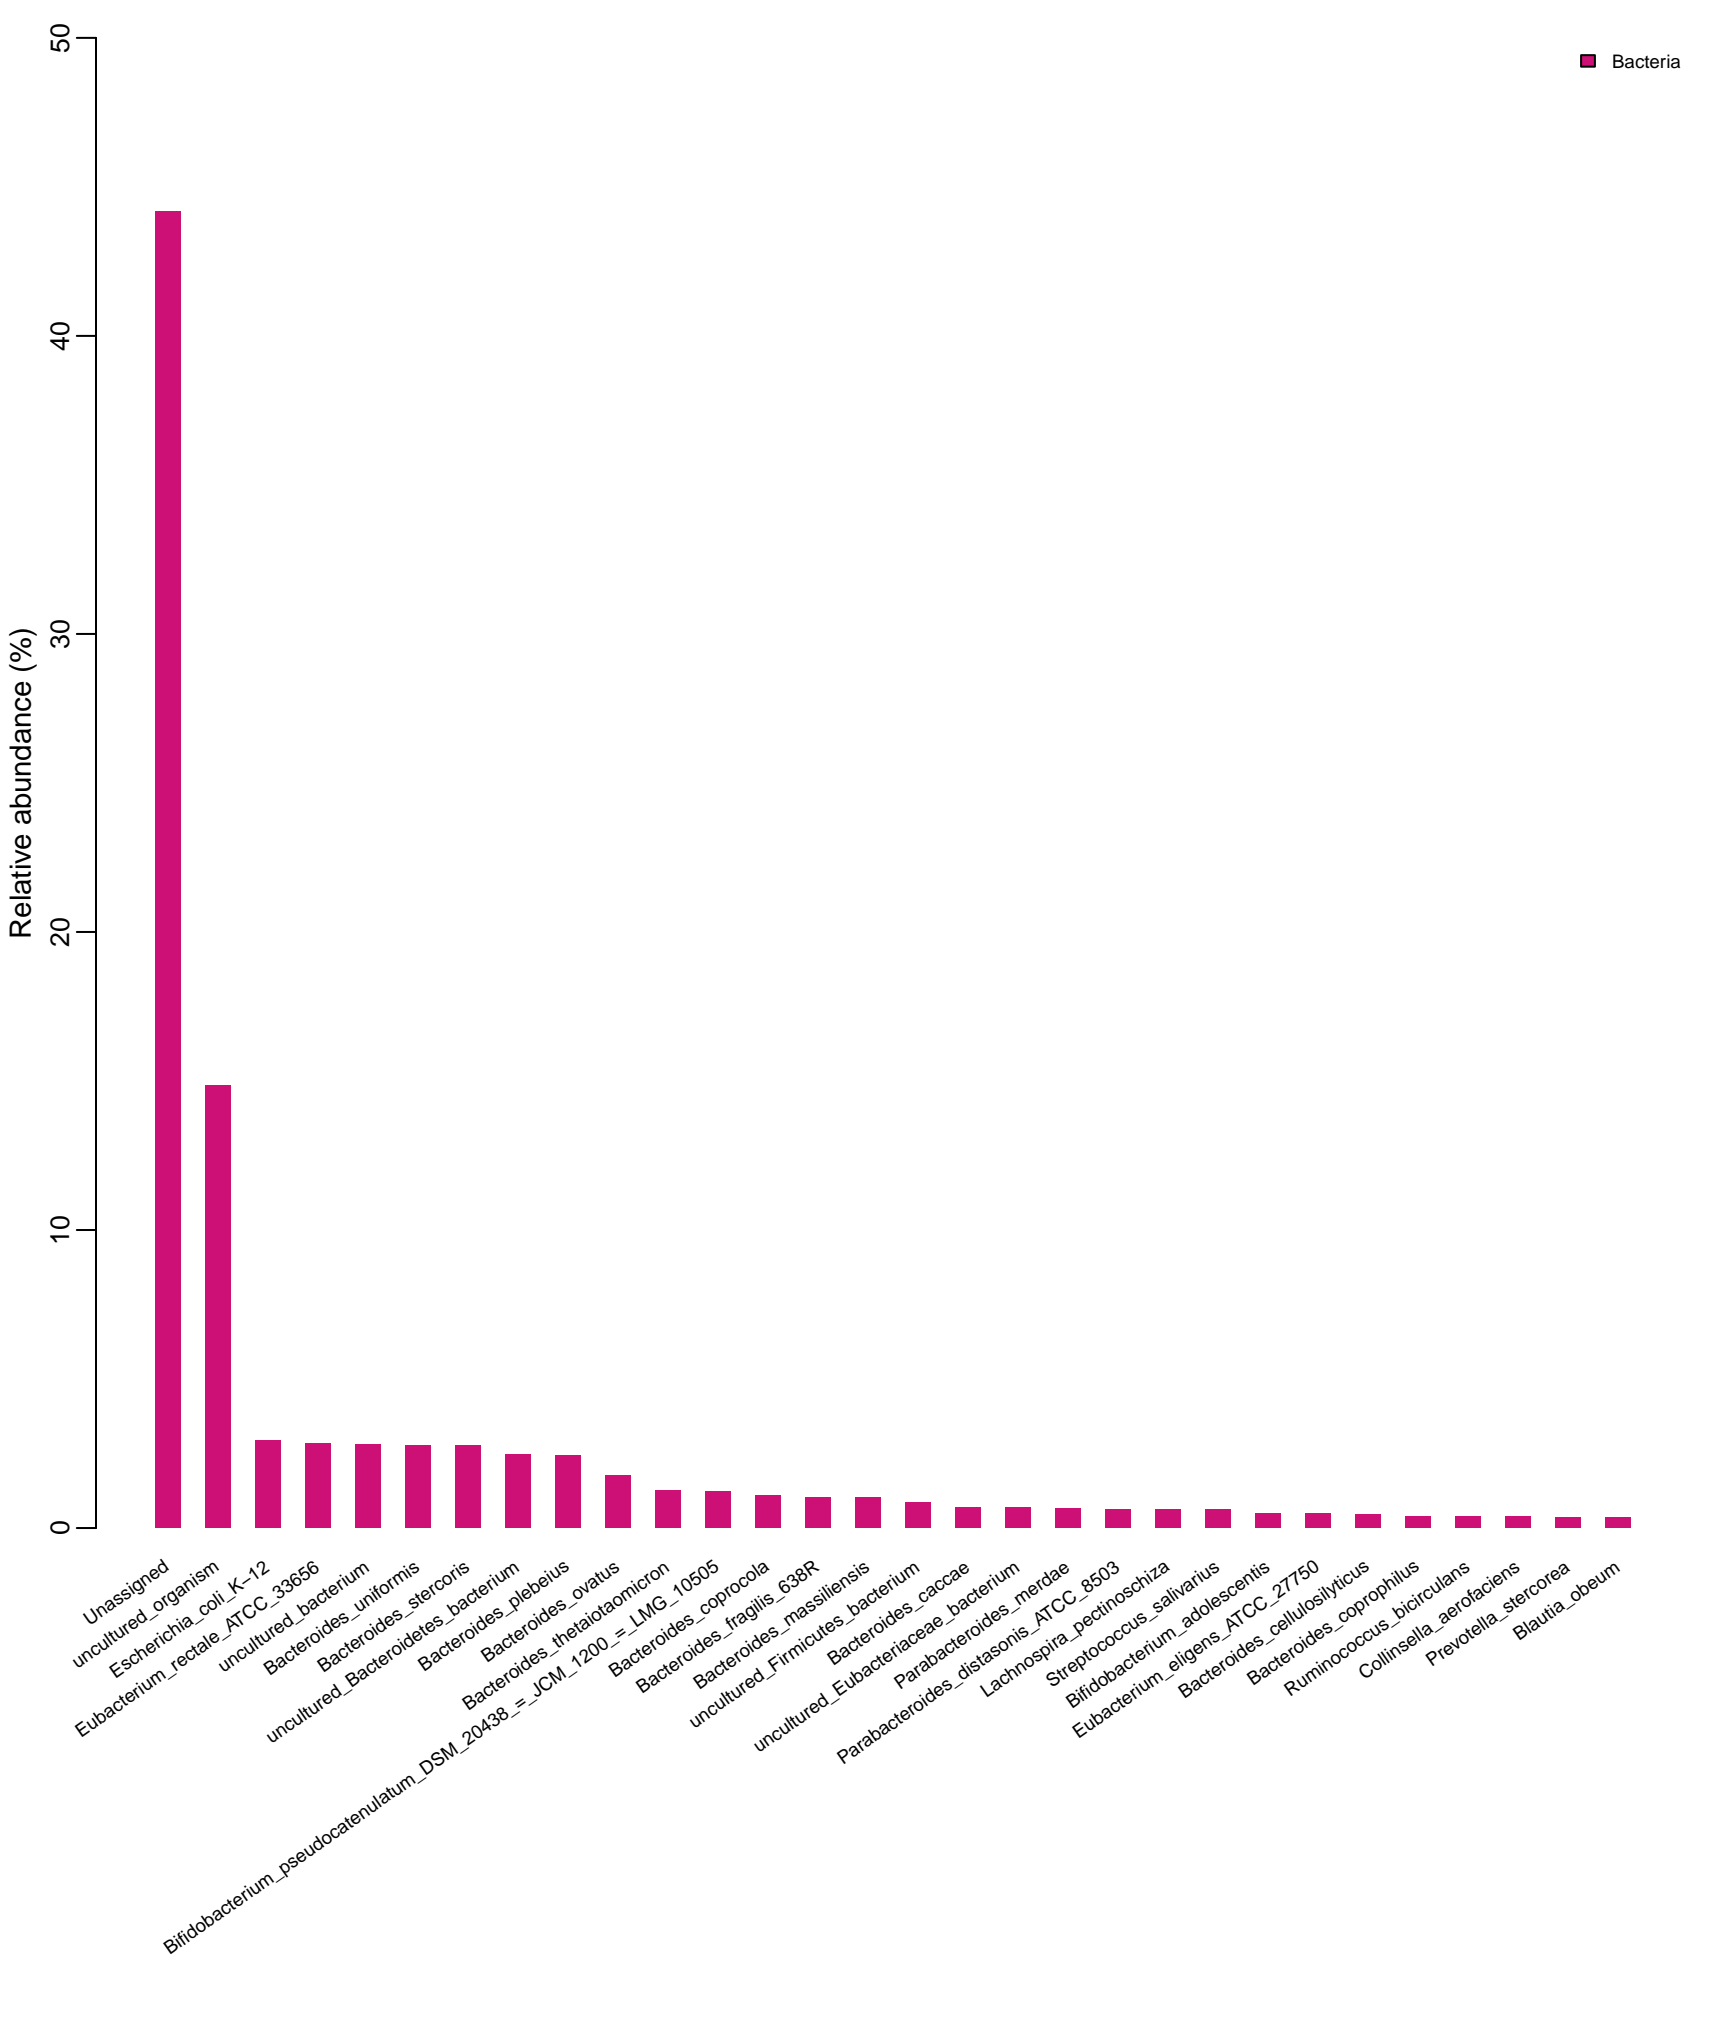

Supplement: data.zip [file data.zip]

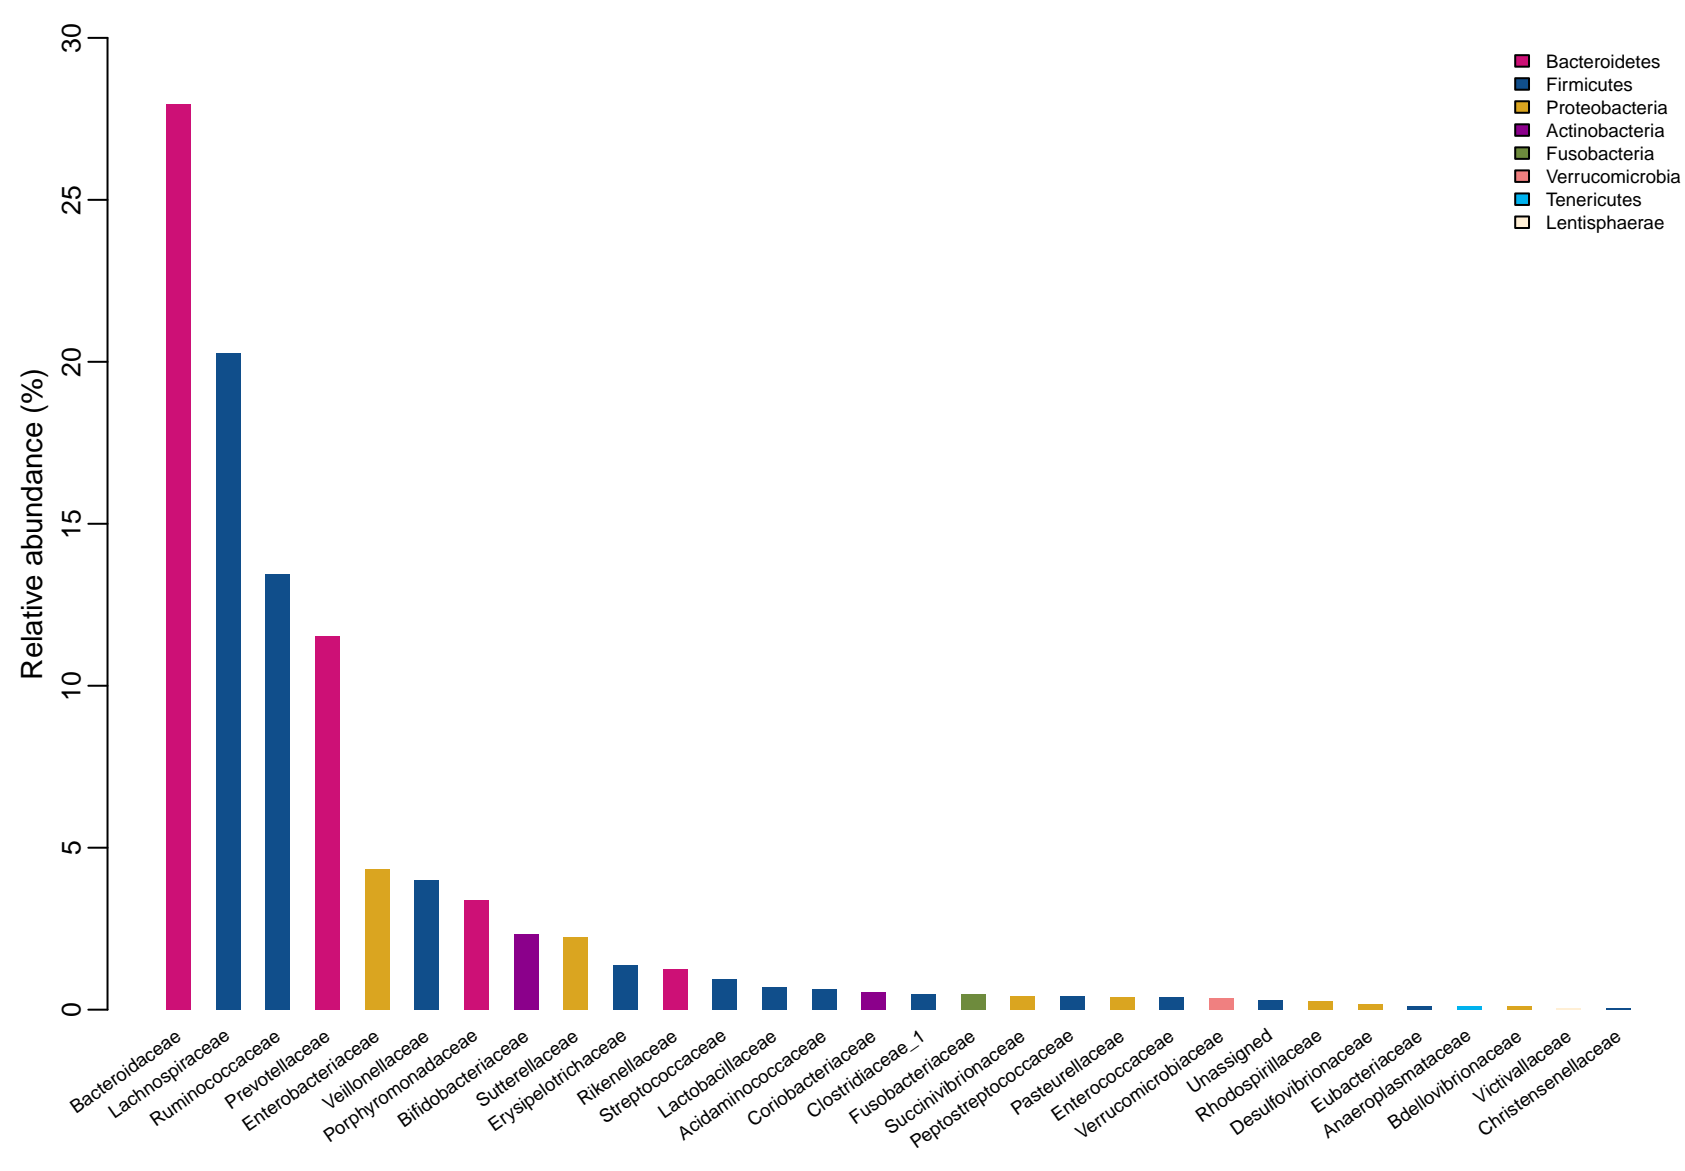

Supplement: data.zip [file data.zip]

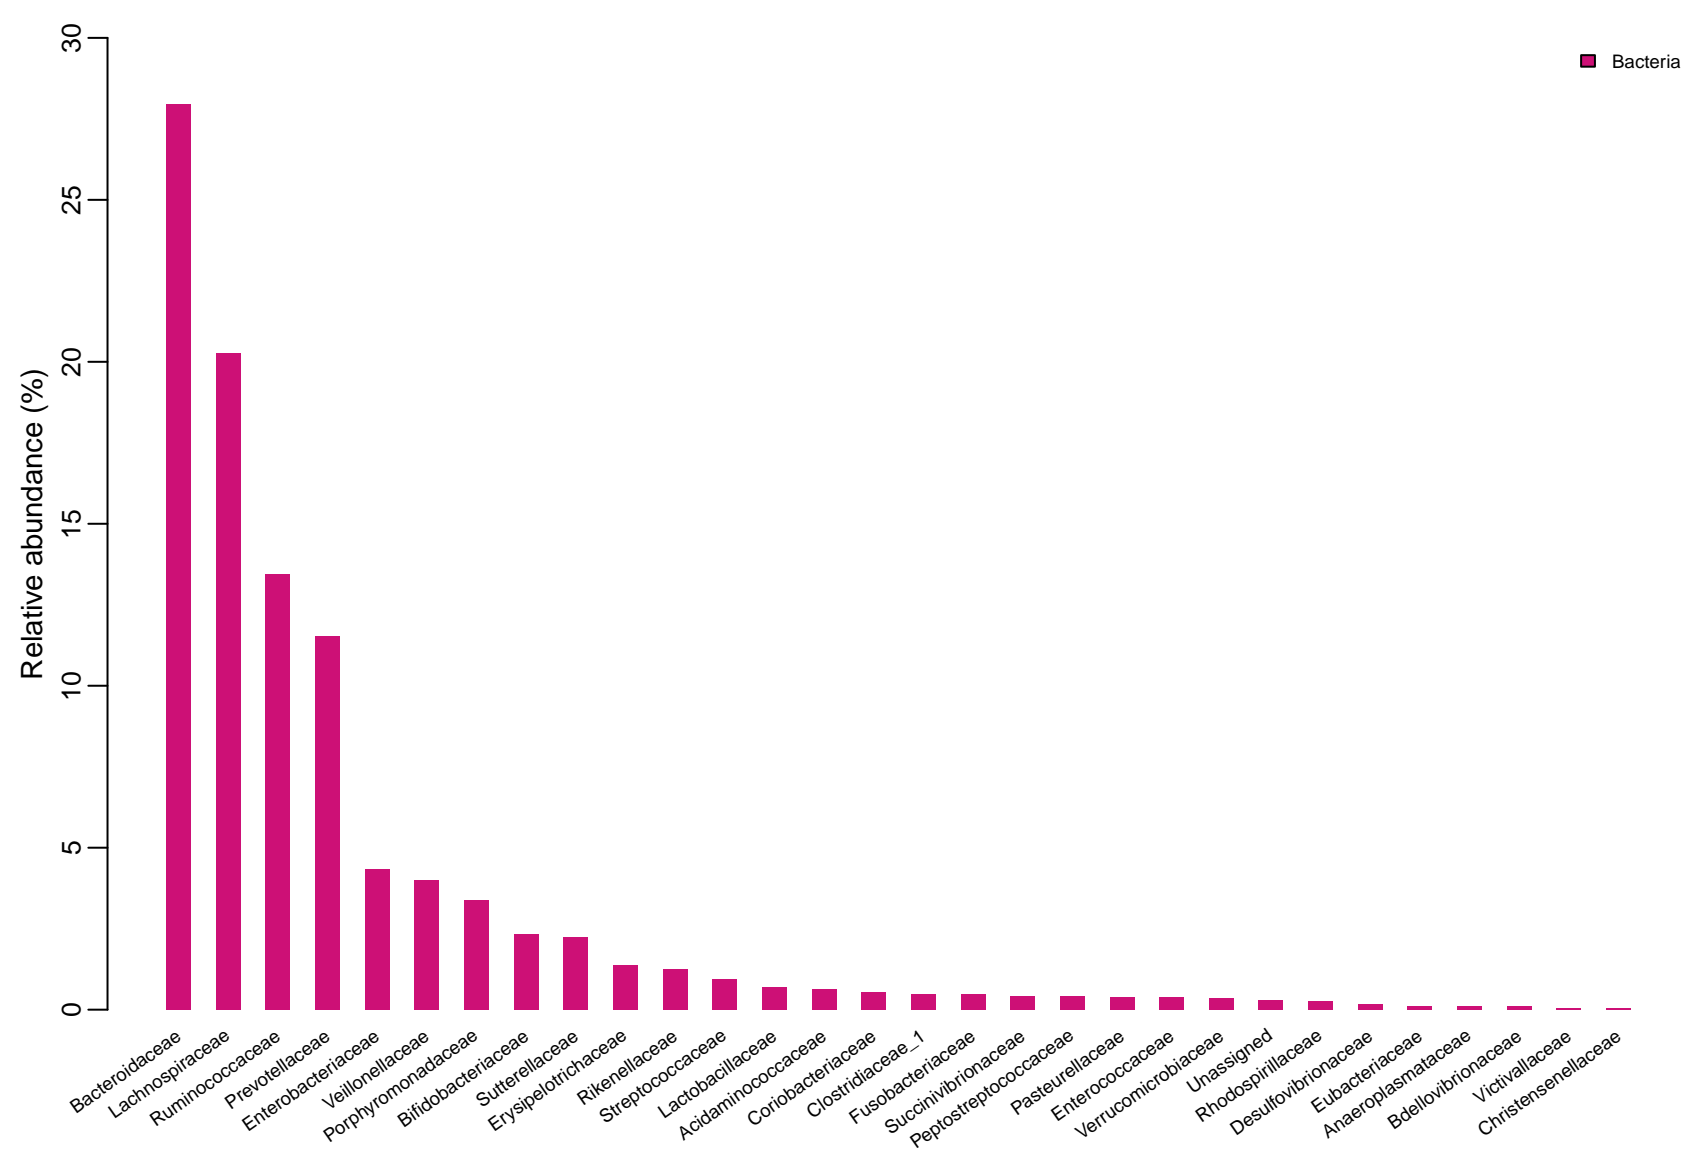

Supplement: data.zip [file data.zip]

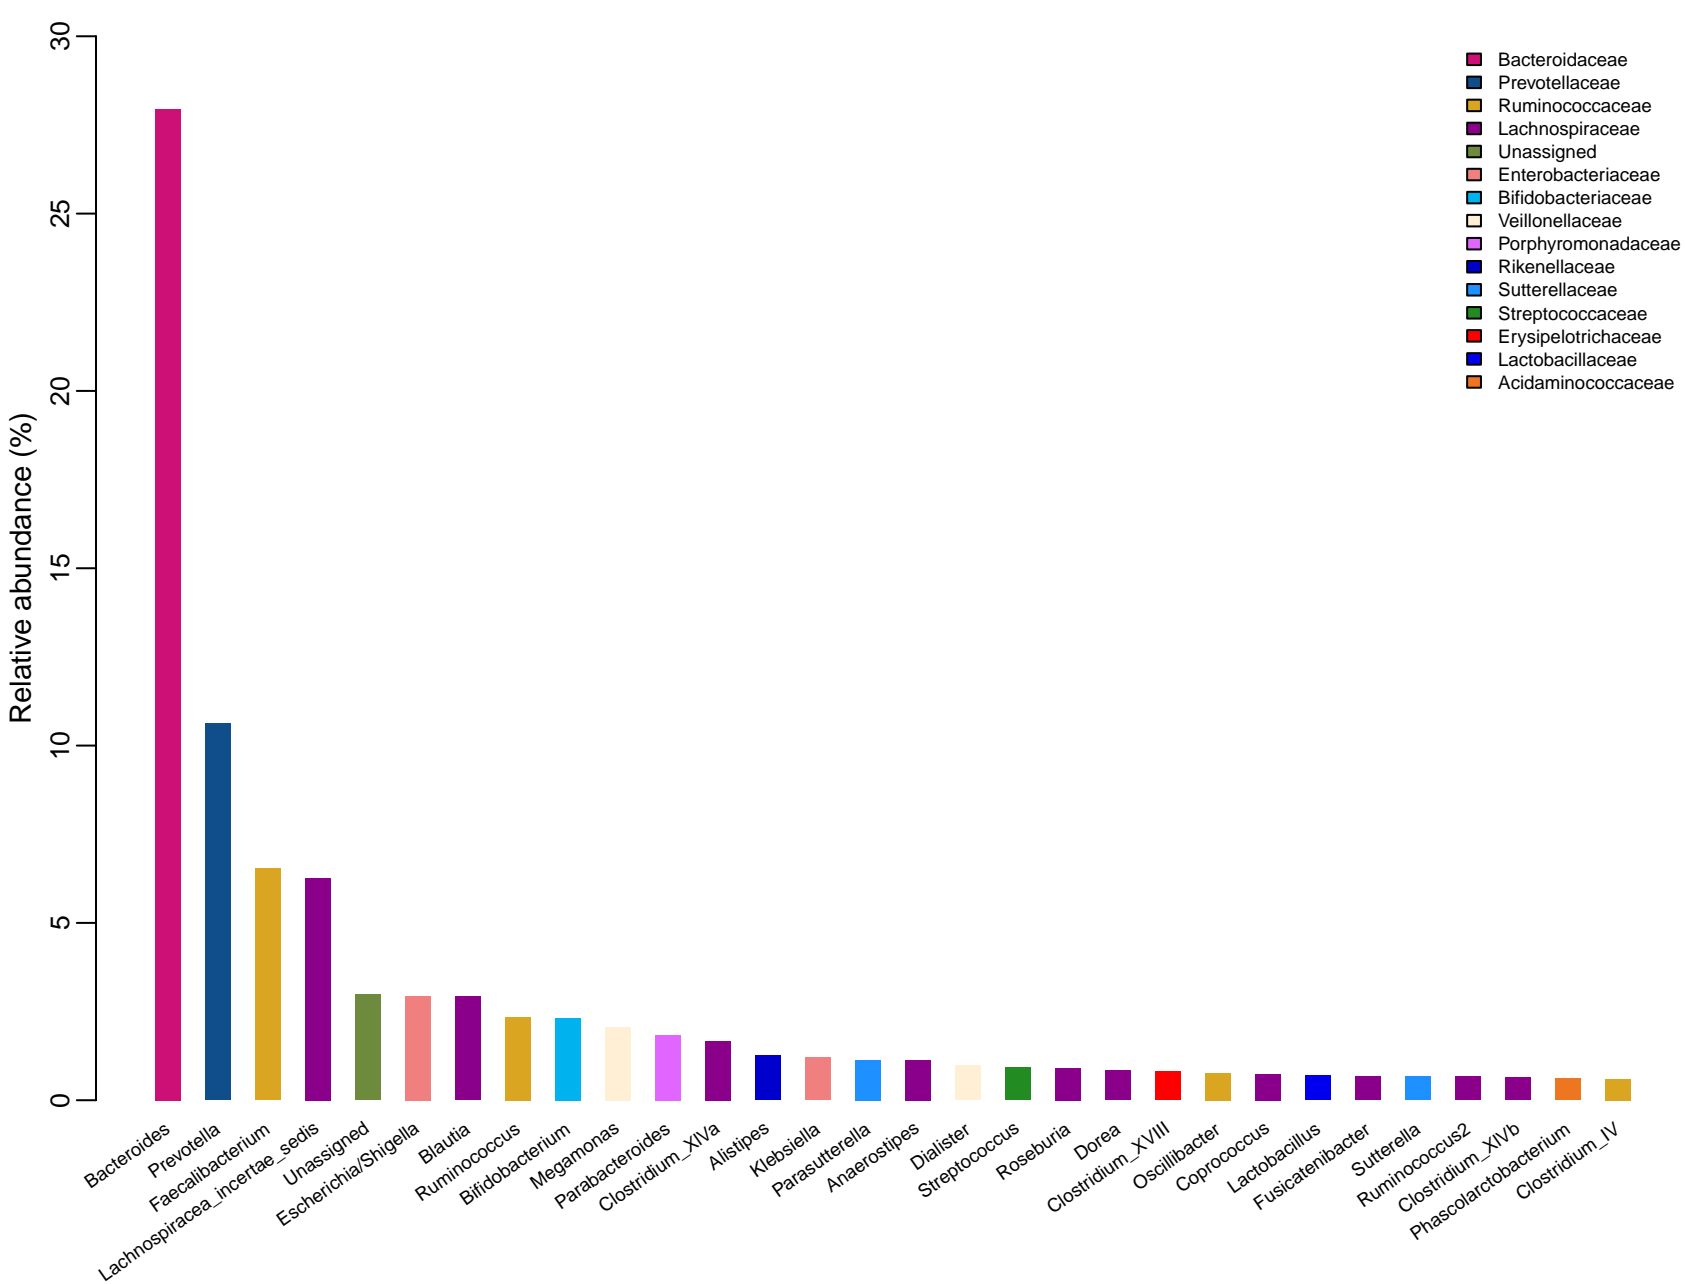

Supplement: data.zip [file data.zip]

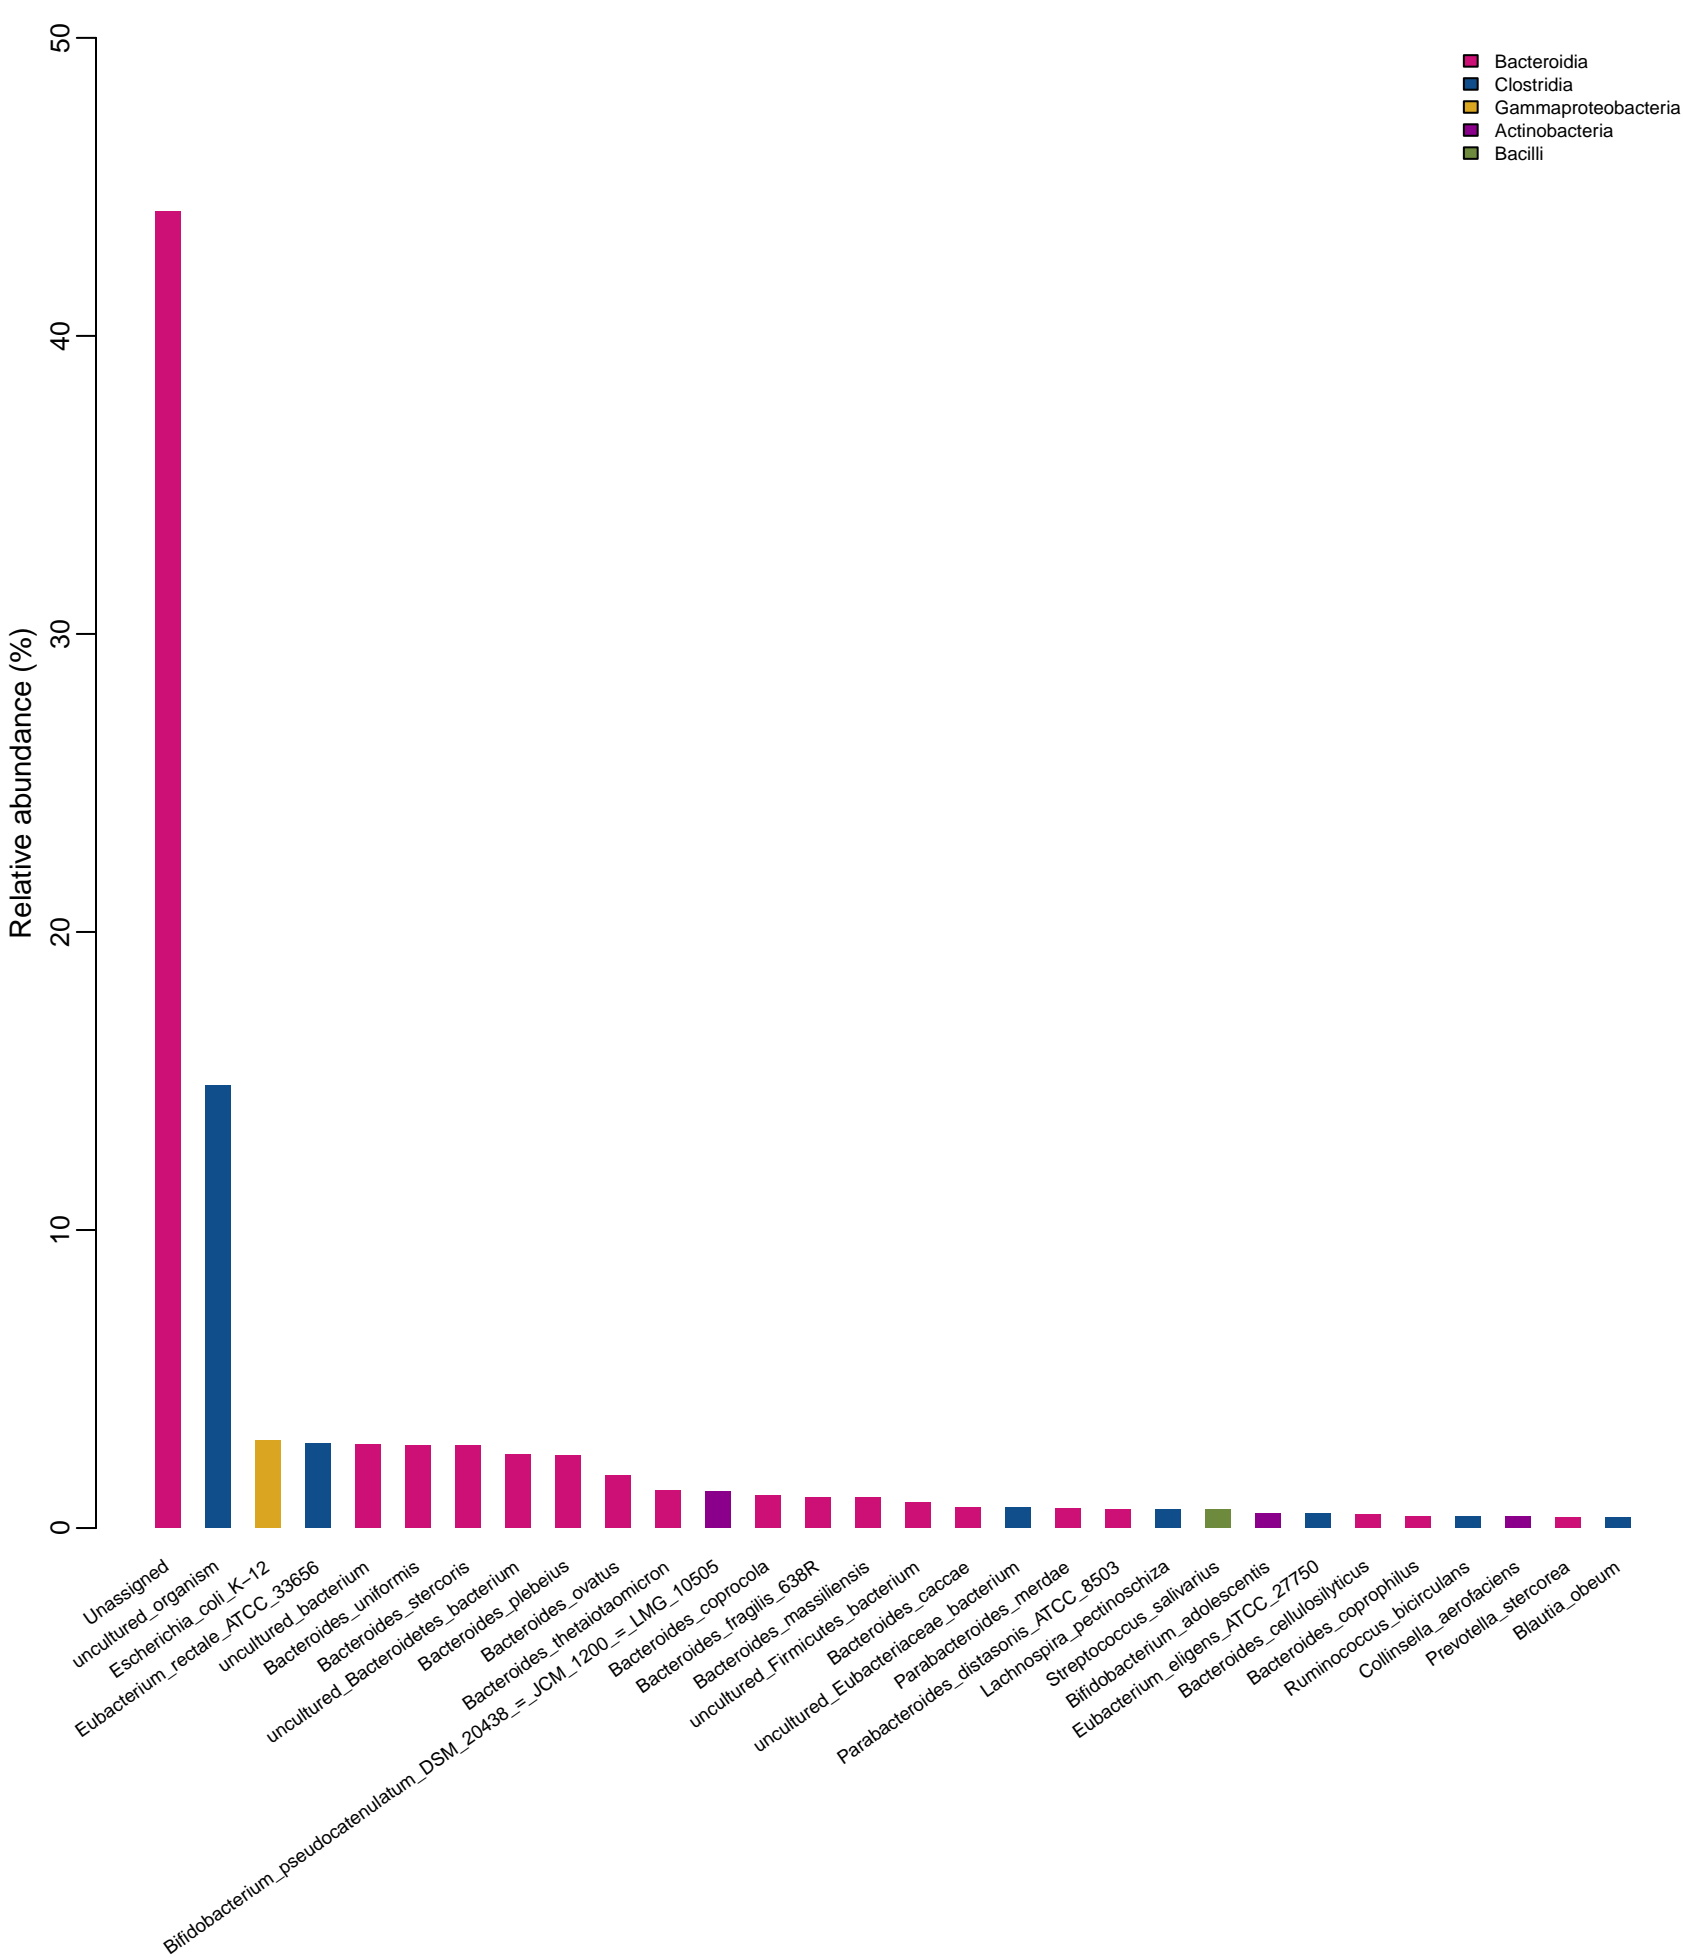

Supplement: data.zip [file data.zip]

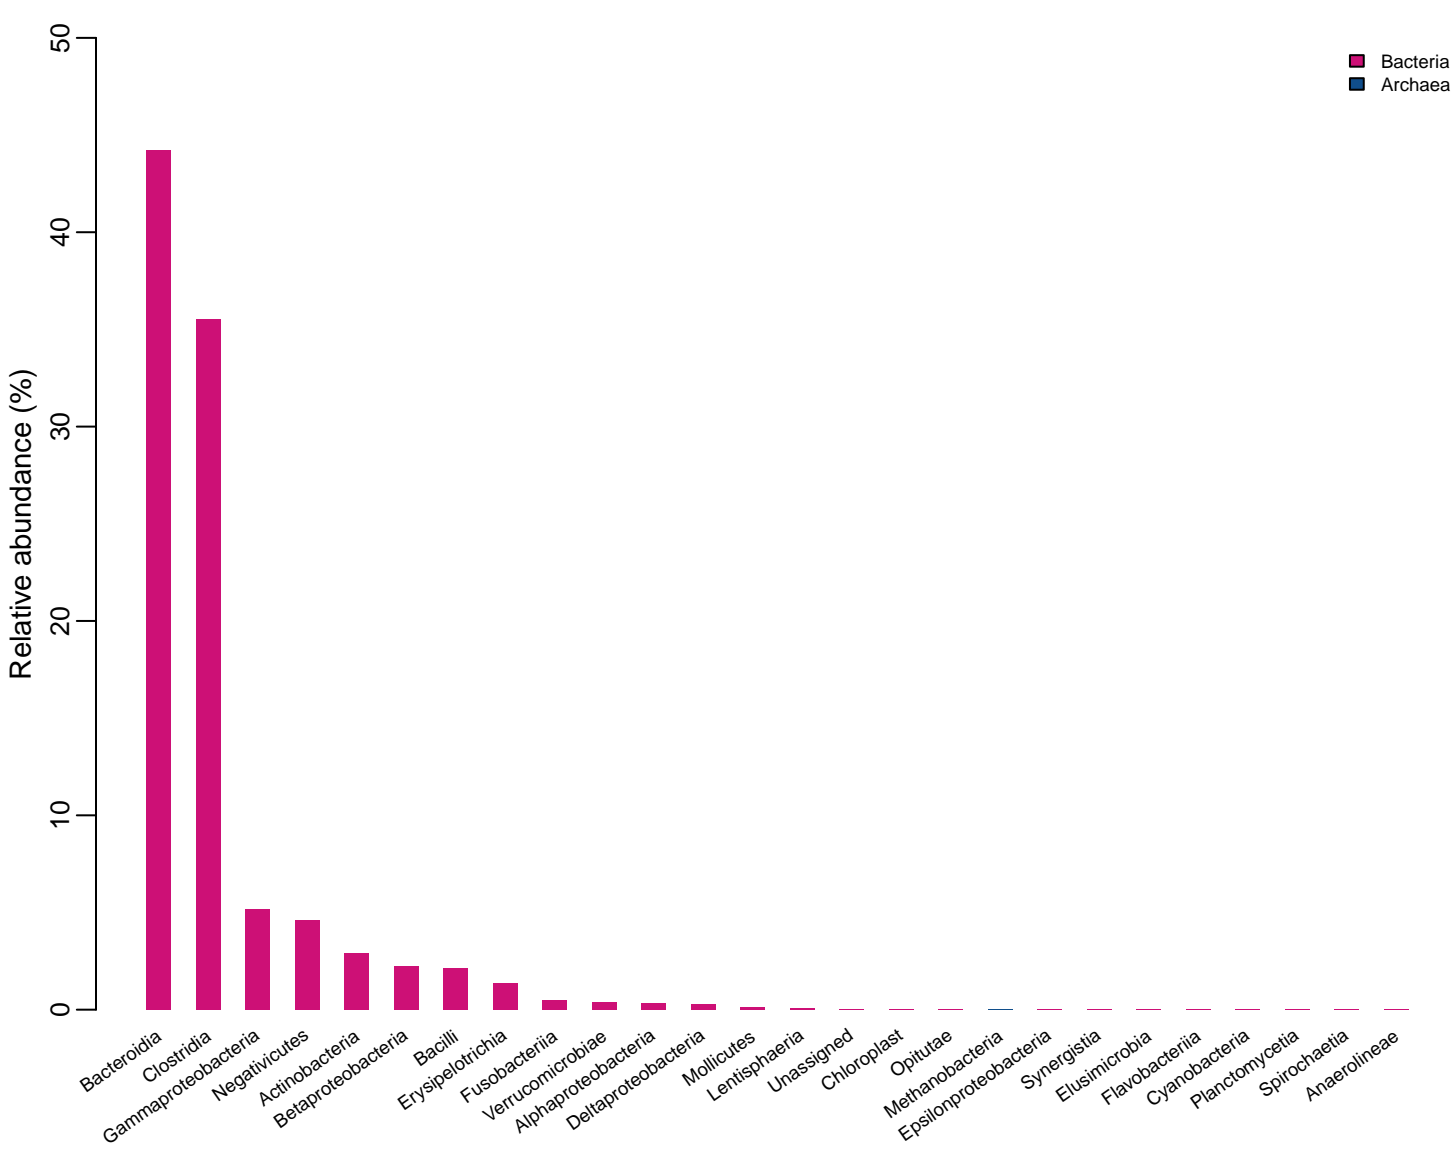

Supplement: data.zip [file data.zip]

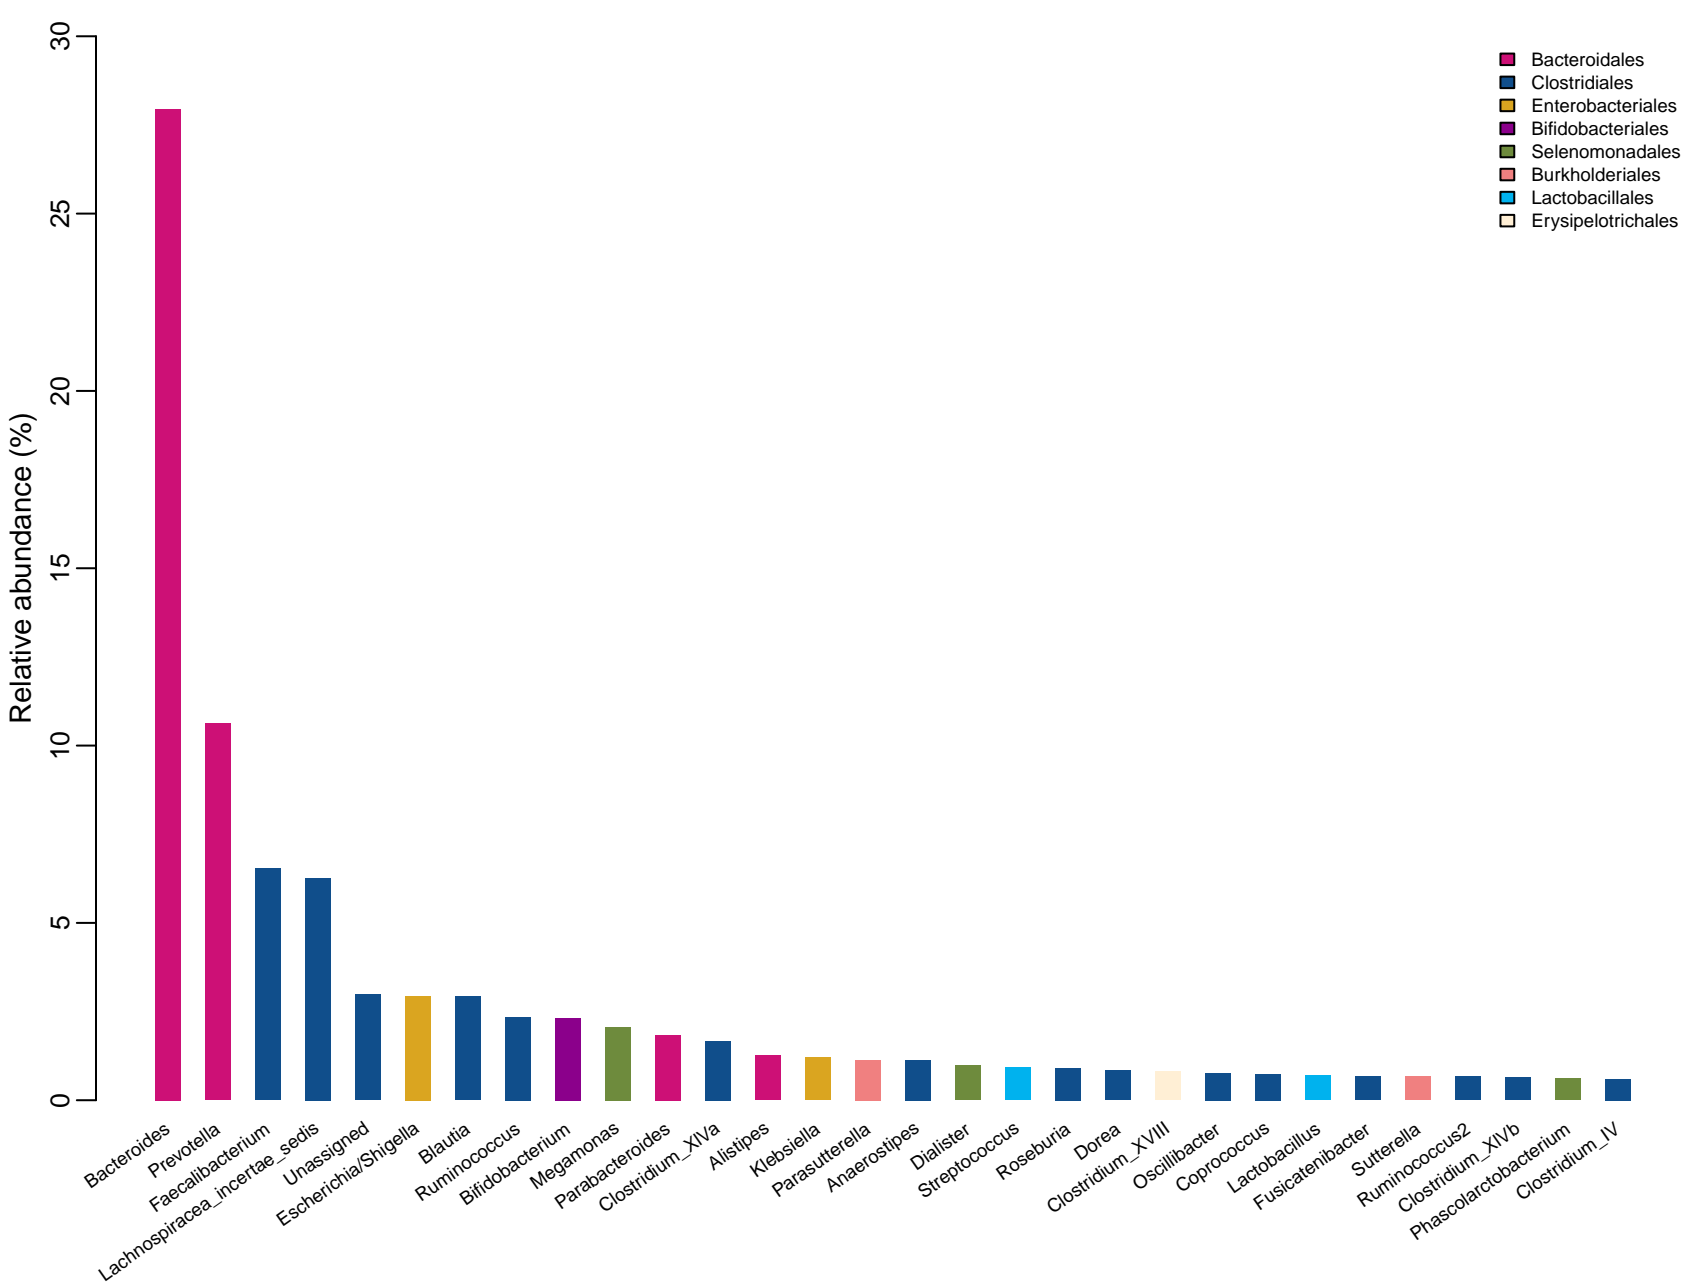

Supplement: data.zip [file data.zip]

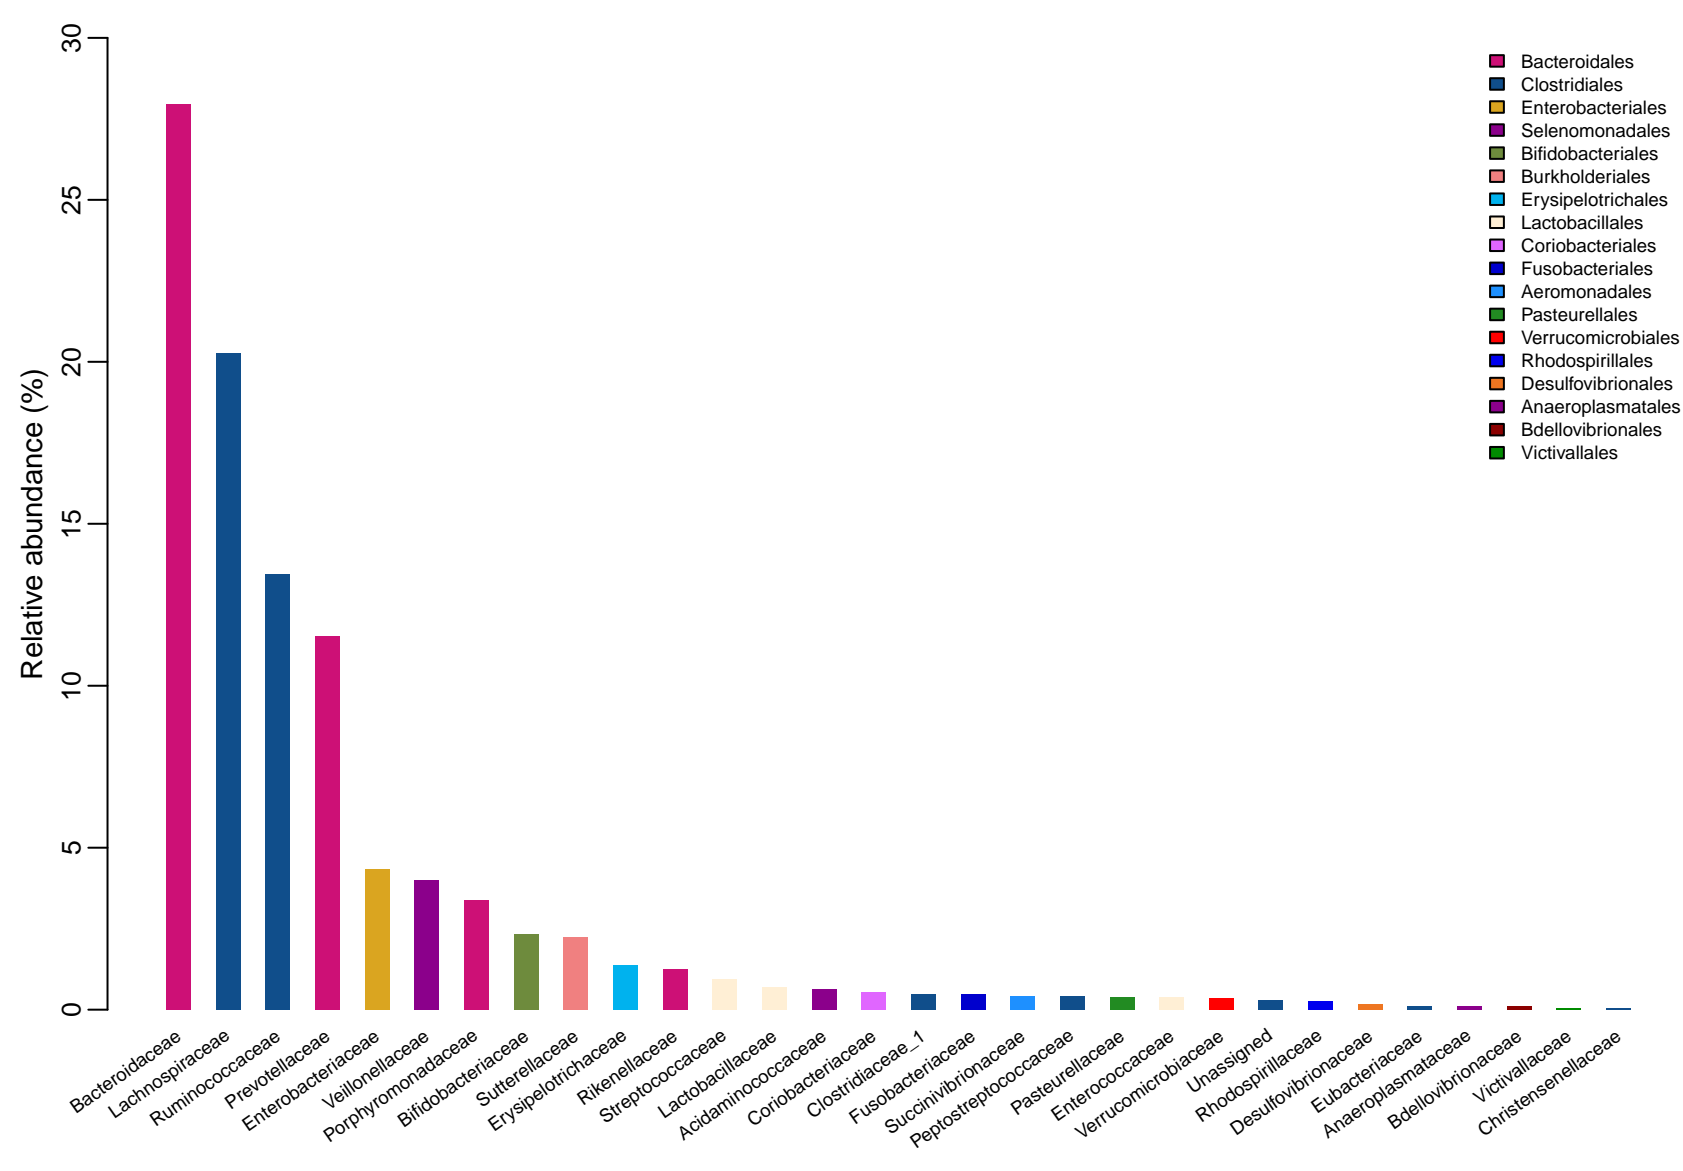

Supplement: data.zip [file data.zip]

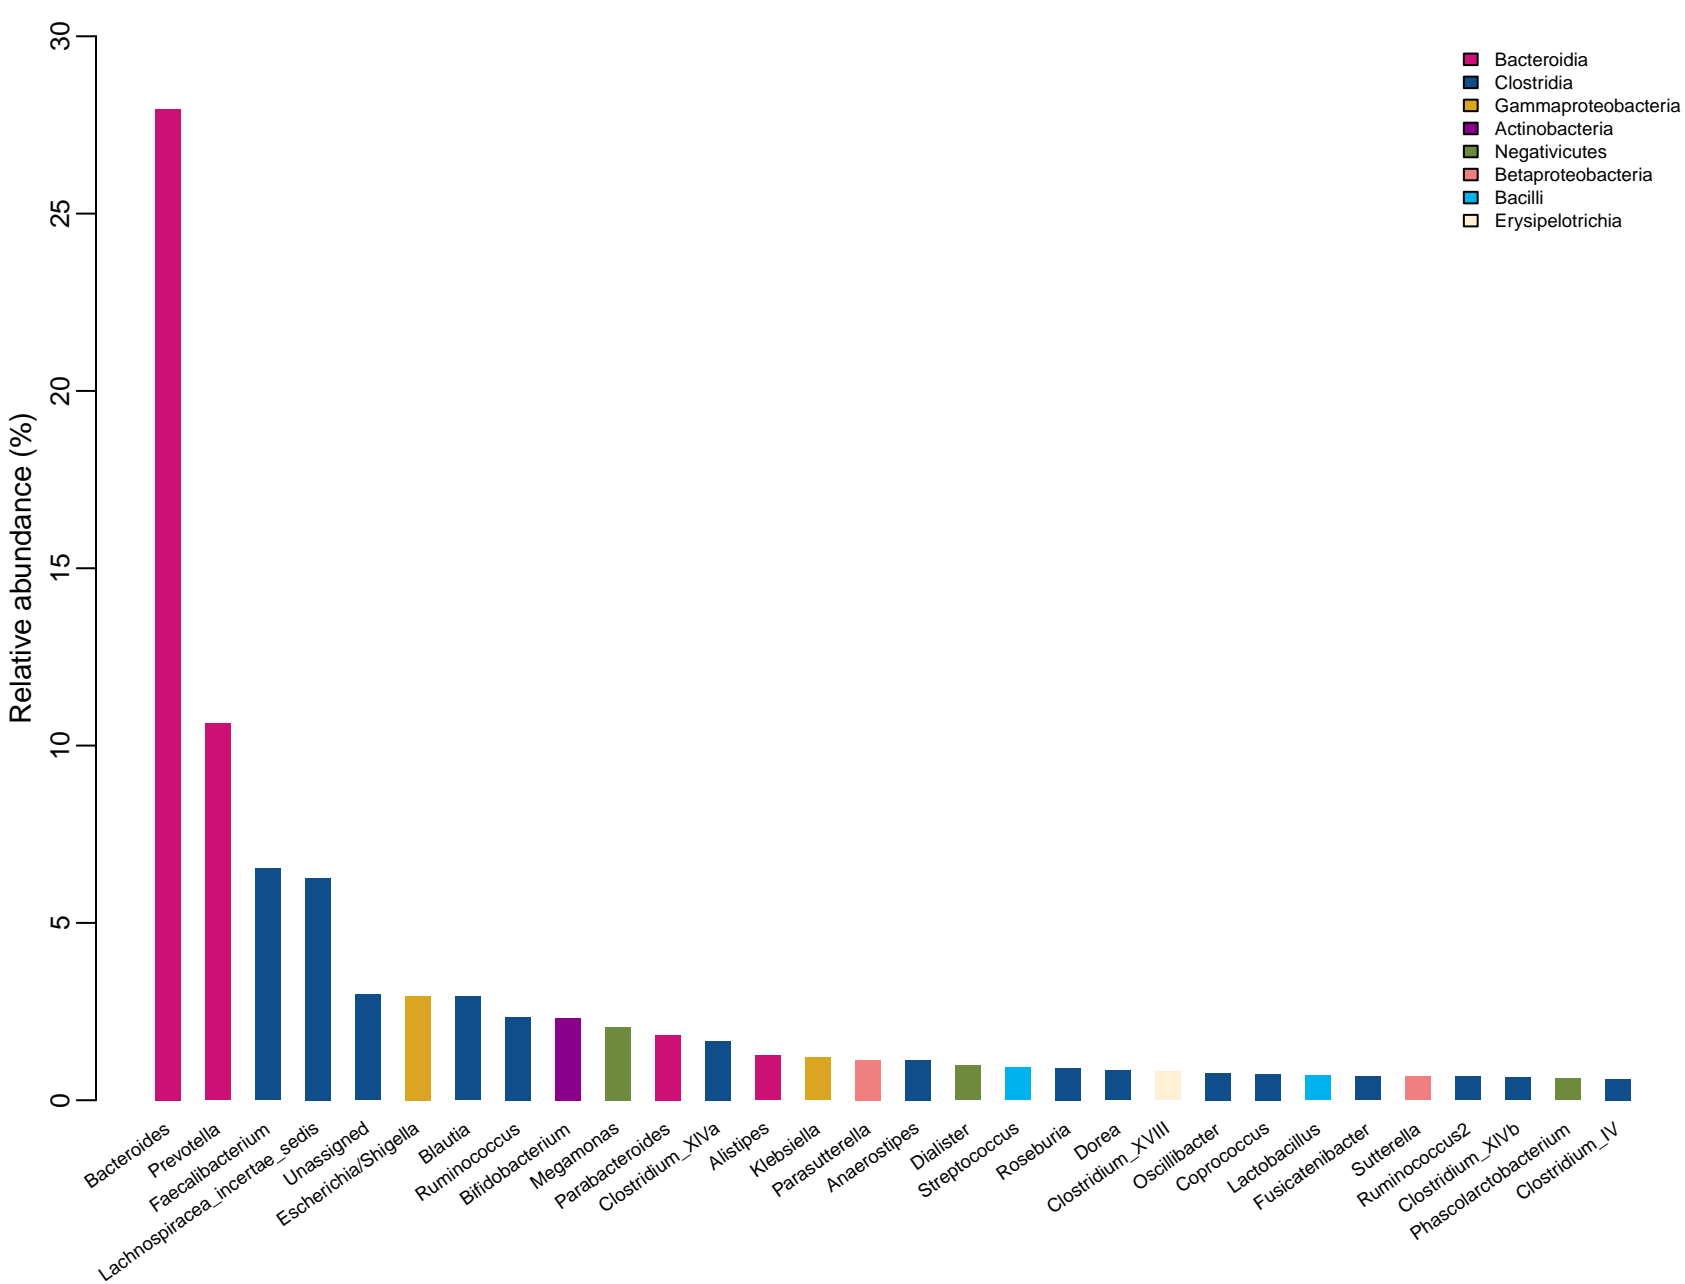

Supplement: data.zip [file data.zip]

Sequence length distribution

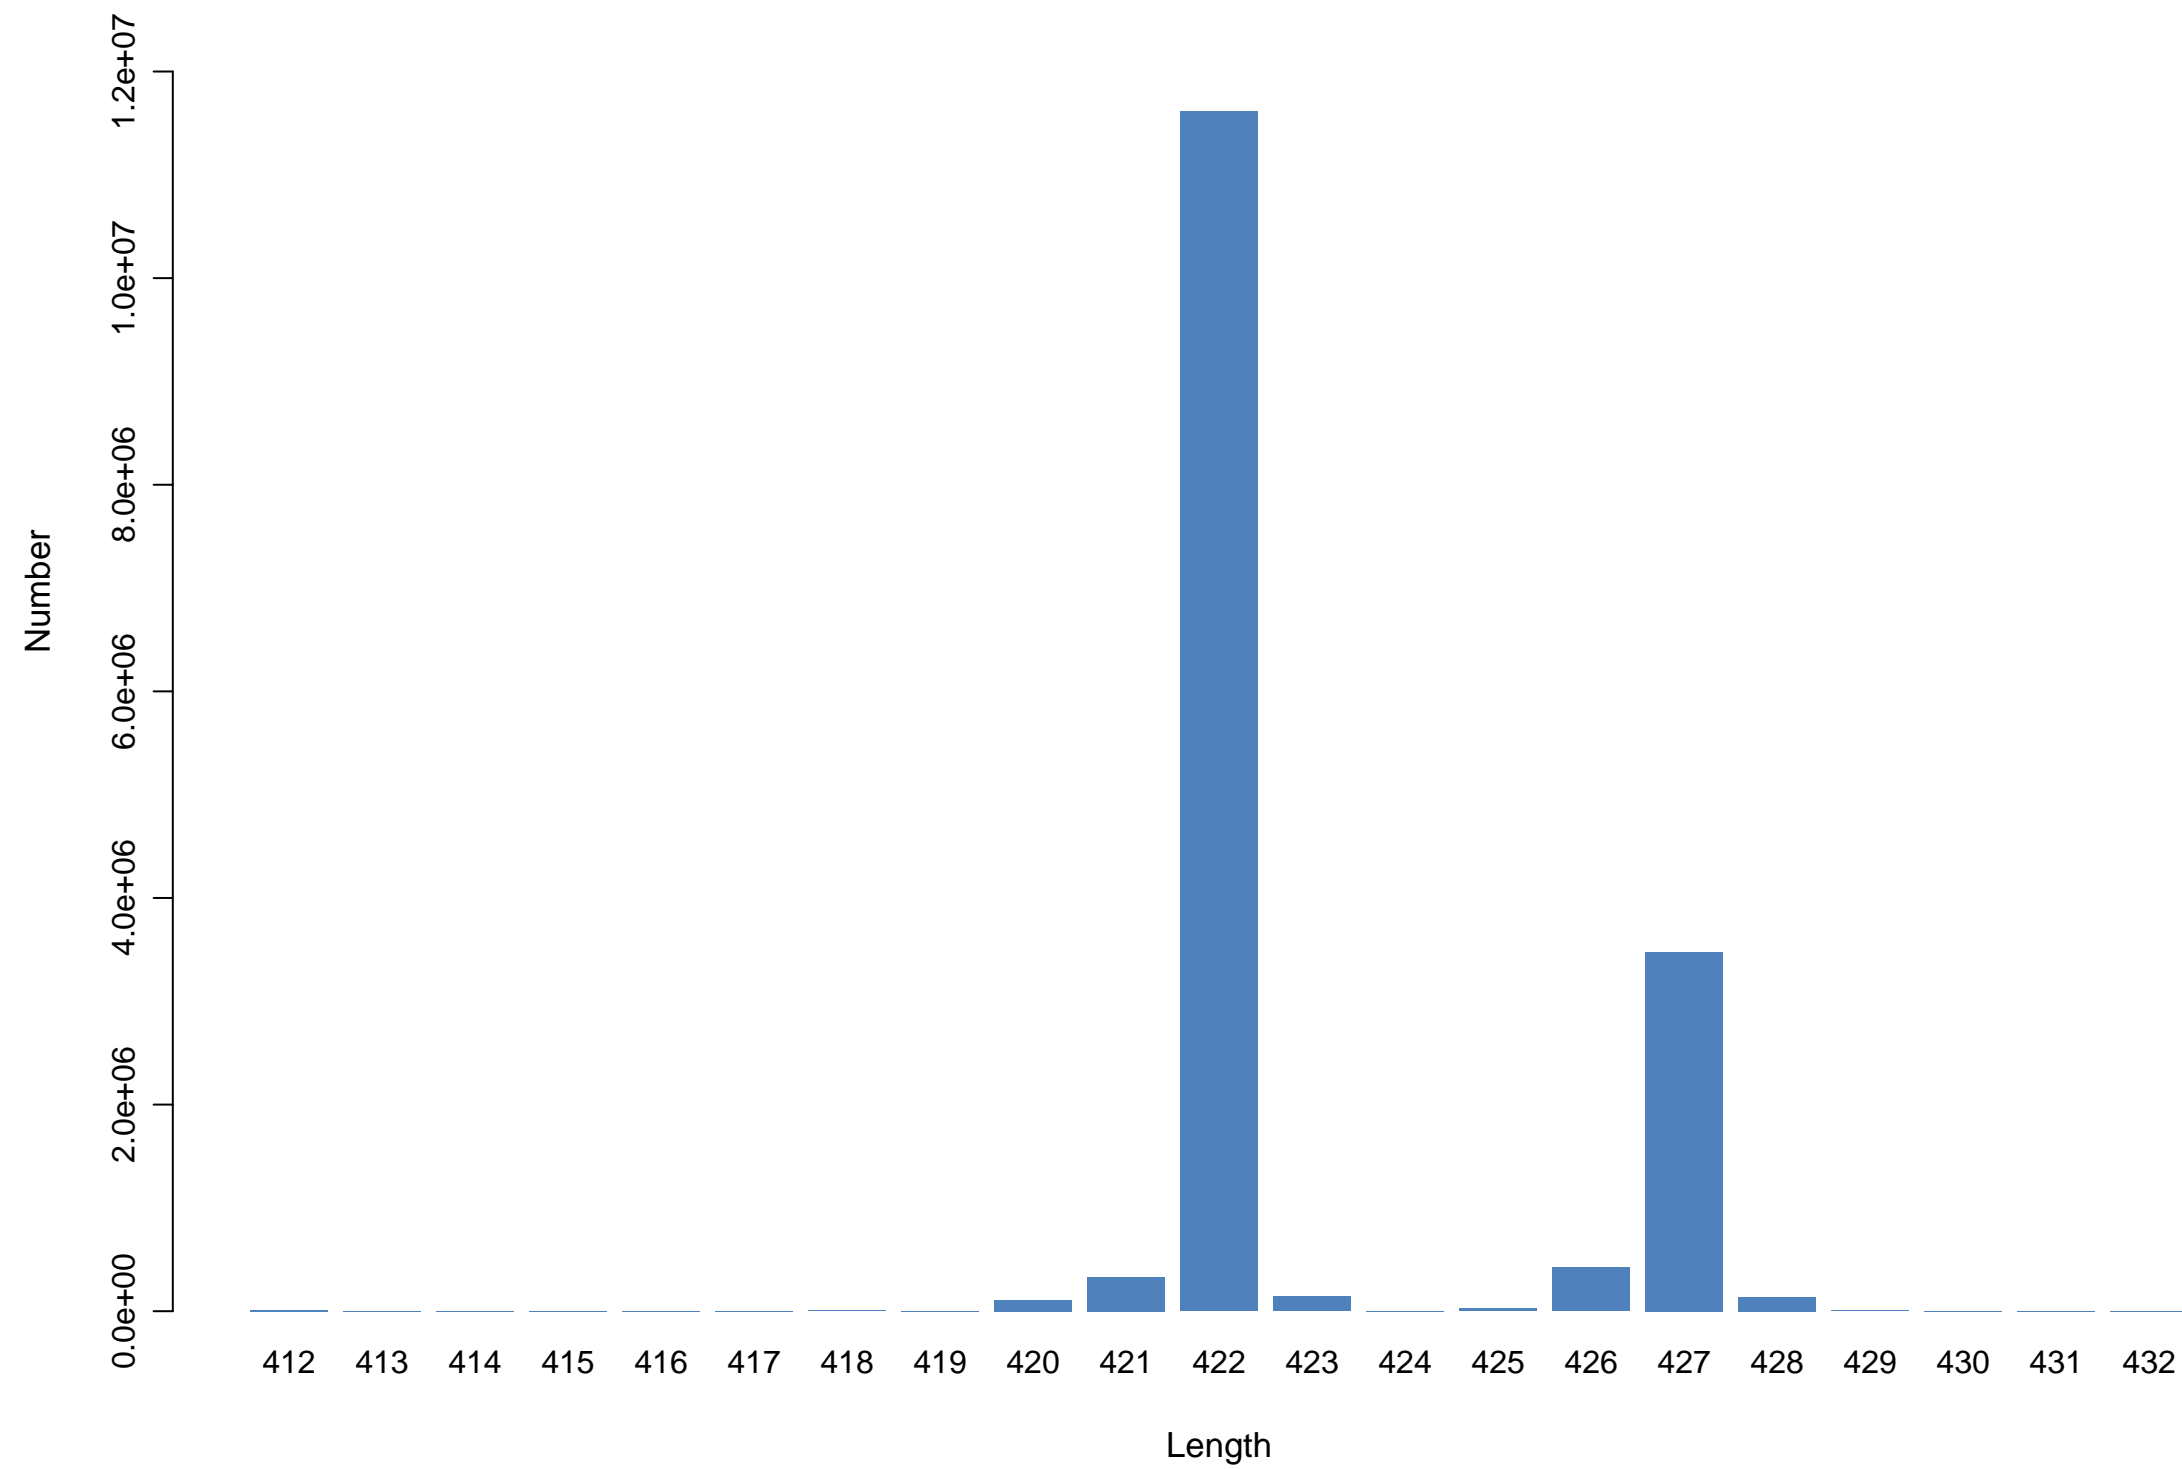

Supplement: sequence.zip [file sequence.zip]
